# Supplementary material for: A proteome-wide map of 20(S)-hydroxycholesterol interactors in cell membranes
Source: Research Square preprint supplement (doi:10.21203/rs.3.rs-258030/v1), 2021-02-22
Supplement: Supplementary file 2 [file 6da7f197d3745c0c1e432733.xlsx]

## Sheet: Fig_3B
Gene_Symbol	log2_fold_change	p_val
Myof	2.10565	0.0648508
Hspd1	2.34891	0.00625193
Pcx	0.501961	0.550227
Hsp90b1	2.44388	0.0129899
Lrp1	2.33562	0.0042658
Pdia3	2.14899	0.00381024
Atp5a1	2.39071	0.00600792
P4hb	2.39839	0.00799721
Lrpprc	2.13774	0.0519269
Calr	2.41263	0.0158031
Idh2	2.34577	0.0172577
Atp5b	2.68162	0.00478046
KRT1	0.397823	0.424288
Serpinh1	2.28811	0.0142888
Hspa9	2.16751	0.0138426
Anxa2	2.13903	0.0106333
Mdh2	2.47355	0.0118611
Hsp90ab1	2.43973	0.0147823
Slc25a4	2.03283	0.0197254
Flna	1.73593	0.0968989
Eef1a1; LOC101056619	2.11176	0.0104775
Tuba1b	2.45977	0.0347172
Rpn1	2.60875	0.0108726
Atp2a2	2.8109	0.0145532
Hspa8	2.50522	0.0178434
Hspa5	2.01266	0.00705925
Anxa1	2.24439	0.0157146
Pkm	2.15951	0.0303631
Actb	2.25529	0.0186801
KRT9	0.692482	0.433491
Pcca	0.406475	0.645522
Anxa6	2.2564	0.0275774
Aco2	1.90628	0.0368417
Nnt	2.60029	0.00843824
Maoa	2.14735	0.0218734
Shmt2	2.31019	0.0204288
Gapdh; Gm20899; LOC100042025; Gapdh-ps15; Gm12033	2.28381	0.00721884
Lgals3	2.60159	0.00486579
Eef1g	2.44311	0.0140975
Eno1; Gm5506; Eno1b	2.00151	0.010163
Atp1a1	2.68074	0.0141363
Eef2	2.38506	0.0289673
Tfrc	2.61406	0.00265701
Slc25a3	3.08846	0.0072518
Mthfd1l	2.13303	0.0235834
Ptgs1	2.2795	0.00749645
Pdia4	2.19739	0.0123237
Vcp	1.96864	0.0983061
Igf2r	2.90542	0.00298574
Tubb5	2.35037	0.0341426
Slc25a5	1.97434	0.0150162
Cyp51	2.70663	0.00804466
Cltc	1.59028	0.183584
Syncrip	1.42677	0.068253
Cyb5r3	2.93834	0.00399606
Got2	2.35019	0.0111564
Ganab	2.4225	0.0109423
Anxa5	2.47736	0.0039029
KRT2	0.364347	0.602366
Lgals1	2.31009	0.0138689
Phb2	2.18509	0.00337752
Cspg4	2.47783	0.00204358
Rpl7	2.29239	0.00880596
Oat	2.28895	0.0144486
Cs	1.95861	0.019647
Canx	2.76919	0.00289707
Ppib	2.86862	0.00207473
Ogdh	1.95374	0.0896374
Aldh2	2.27769	0.0101152
Pdhb	2.36402	0.0179142
Nedd4	2.16112	0.0364264
Uggt1	2.21137	0.0127018
Actn1	1.7475	0.0892823
Rpn2	2.62779	0.00472719
Hnrnpf	1.92286	0.0382132
Atl3	2.62861	0.0122263
Rab7	3.05217	0.00283504
Hadha	2.10948	0.0429732
Pla2g4a	2.64733	0.0124308
Ncl	2.31252	0.0179212
Gnb2l1; Rack1	2.41532	0.0219953
Rab2a	3.17855	0.00750648
Hyou1	2.04849	0.00218101
Ppia	2.51745	0.0164318
Prdx1	2.75694	0.00364914
Lrrc59	2.11222	0.0451267
Msn	2.27274	0.00558801
Dlat	1.6469	0.0472574
Rps2; Rps2-ps13	2.27358	0.0103271
Gpd2	2.60683	0.014768
Ldha	2.48135	0.014326
Rpl23a	1.78631	0.0175852
Eif4a1	2.68863	0.0104769
Itgb1	2.63713	0.00293155
Mccc1	0.538373	0.425272
Vat1	3.27773	0.002363
Rps27a; Rps27a-ps2; LOC100042019	2.8716	0.00944589
Sdha	2.39958	0.0278129
Rps13; Rps13-ps1; LOC102642137	1.55742	0.0168114
Arl8b	3.02296	0.017
Sucla2	2.40332	0.0070345
Pgk1	2.65365	0.00606459
Dld	2.0219	0.00969493
Gfm1	2.06062	0.0332152
Slc25a24	2.54195	0.0203687
Uqcrc2	2.34262	0.0124949
Psap	3.28089	0.000218504
Anxa4	2.52555	0.00471291
Hsd17b4	2.10112	0.00532763
Eif5a	2.76158	0.024373
Hsd17b12	2.79724	0.0139664
Atp2b1	2.85064	0.00929039
Ywhae	2.9636	0.00652566
Trap1	2.18937	0.0159664
Hnrnpk	1.87908	0.0194224
Slc3a2	3.4629	0.00169779
Vars	2.09771	0.0667054
Psat1	2.72623	0.00909775
Vps35	2.2594	0.0347937
Lnpep	2.6625	0.00199132
Acadl	2.23008	0.0353158
ALB	1.89189	0.104085
Rplp0	2.29542	0.0221935
Rpl27; LOC108167922	2.30642	0.00707625
Nomo1	2.20837	0.0120351
Rpl14	2.12268	0.0191577
Rab1b	3.00289	0.00376305
Stt3a	2.87379	0.0104437
Vdac2	4.83086	0.000419699
Rpl4	2.13026	0.0222424
Tomm40	3.10456	0.00296781
Por	2.77019	0.00808483
Steap3	3.04289	0.00386586
Zmpste24	3.26716	0.00238078
Kpnb1	2.62757	0.0187293
Etfb	2.08818	0.0129582
Pzp	1.77351	0.00560612
Pitrm1	2.2035	0.0373585
Eci1	2.30531	0.0194541
Aldh1l2	2.25643	0.0290391
Gls	2.71252	0.0295714
Oxct1	2.46613	0.0198041
Atp5c1	2.51772	0.00275498
Ckap4	2.47844	0.00484882
Phb	3.04462	0.00301811
Tmed2; Gm21540; LOC100862175; Gm10698	2.99518	0.00204039
Acadvl	2.3884	0.00789502
Ptgs2	2.45595	0.00614561
Rpl35	1.20733	0.132828
Vdac3	3.30134	0.00159771
Atp5o; LOC100047429; LOC102641678	2.88375	0.00241797
Mfge8	2.97514	0.00295247
Mlec	2.87798	0.00410919
Cct6a	1.75439	0.0955544
Vdac1	5.16028	0.000354989
Ergic1	2.84494	0.010497
Lman2	2.87158	0.00288532
Nme1	2.41172	0.0153031
Copb2	1.8157	0.149279
Aifm1	2.37669	0.00485073
Prdx5	3.00187	0.00268918
Rab14	3.26104	0.0044891
Rap1b	3.01442	0.00500973
Atp5h	2.62821	0.00981899
Ddost	2.93113	0.00252239
Rps3	2.52902	0.0114249
Hspe1	2.11716	0.00208616
Dlst	2.23028	0.00633149
P4ha1	2.42595	0.0171534
Slc25a12	2.24054	0.0289503
Hnrnpd	2.39122	0.0162611
Hsp90aa1	2.28892	0.0198264
Lss	2.44572	0.0248861
Nexn	2.24612	0.0240831
Ephx1	4.91923	0.000744929
Inf2	2.44319	0.0312194
Atp5f1	2.53404	0.0126432
Tcp1	2.02736	0.0595034
Ap2b1	1.98014	0.0756853
Cct8	1.90392	0.0771568
Acaa2	2.49156	0.0132469
Pfn1	2.98389	0.00891408
Acat1	2.38383	0.0121186
Aldh18a1	2.33139	0.0417763
Tufm	2.05977	0.0412977
Flnb	2.04933	0.0384181
Tmed10	2.99112	0.00543664
Rps3a; Rps3a1	1.72462	0.0536076
Txndc5	2.41006	0.0126782
Grpel1	2.2896	0.0083425
Aldoa	2.18342	0.0442921
Slc25a13	2.28126	0.0194146
Anxa7	2.76026	0.00335276
Fads2	2.75551	0.0274524
Uqcrc1	2.54892	0.0144136
Vapa	2.67374	0.0153415
Anxa11	2.56549	0.00591679
Gba	2.95949	0.00168952
St13	2.41464	0.0202109
Far1	2.24118	0.043984
Man2a1	2.61605	0.0105571
Rps9	2.57544	0.0135258
Ddx39	2.57433	0.0102586
Eef1b2	2.25331	0.0210101
Lbr	1.99395	0.023124
Rpl12	2.38626	0.0319229
Suclg2	2.53862	0.00731409
Hist1h1c	0.427093	0.212394
Arf3	2.63652	0.00487856
Pa2g4	2.21688	0.0143623
COX2	2.81192	0.00679493
Acot9	2.12404	0.0413134
Pabpc1	2.24226	0.0200932
Pgrmc1	2.71632	0.00069851
Cct7	1.88094	0.102868
Acad9	2.25591	0.017126
Lman1	2.16003	0.00769304
Fdps	2.46644	0.0156226
Scp2	3.06384	0.00302723
Itgav	2.29439	0.00640519
Cap1	2.42519	0.0149265
Hspa4	2.39207	0.0251322
Rps25	1.68716	0.0354454
Rpl23; LOC100044627; LOC100862455	1.71575	0.0507596
Cct3	1.95797	0.0675241
Prdx3	2.25727	0.014381
Pcyox1	3.08399	0.00317498
Tpi1	2.73185	0.027695
Rab18	2.87671	0.00606448
Stip1	1.91959	0.0243805
Rab21	3.11957	0.00766245
Lonp1	1.97475	0.0387348
LOC100045999; Ran; LOC102641332	2.79104	0.010576
Etfa	2.43684	0.0047613
KRT14	0.551978	0.142117
Cyp20a1	2.59149	0.01361
Slc25a10; 0610009L18Rik	2.60894	0.0196698
Acadm	2.10021	0.00631258
Cd109	2.52658	0.00308767
Acot13	2.2089	0.00608682
Bzw1	2.74627	0.00912133
Rps11	2.23673	0.0101796
Rpl34-ps1; Rpl34; Gm4705	1.60625	0.00664021
Atp6v0d1	2.93508	0.0142162
Cct4	1.85412	0.0750248
Cfl1	2.23106	0.0157863
Hk2	1.95484	0.0518018
Sgpl1	2.297	0.0558283
LOC100850059; HBB	2.77964	0.0115029
Prdx4	2.13022	0.0517658
Mrps30	2.04334	0.0150005
Sc4mol; Msmo1	3.38551	0.00890002
Pgrmc2	3.34245	0.00213277
Lclat1	2.57873	0.0174521
Khsrp	2.20652	0.00629513
Suclg1	2.31893	0.0271711
Copg; Copg1	2.00135	0.0760391
Nras	2.59987	0.0227232
Cyc1	2.62602	0.0133416
Snd1	2.22632	0.0383087
Pdia6	2.52721	0.00761633
Cat	1.96754	0.0094714
Rab8a	2.85743	0.00630951
Gnb1	2.21529	0.0303586
Lamb1	2.37577	0.00742156
Tmem33	2.62007	0.0131345
Hadhb	2.18754	0.0149667
Lap3	2.29887	0.0225301
Rab11b	3.01783	0.0018272
Napa	2.60712	0.0129564
Nmt2	1.29955	0.119799
Pdha1	2.28301	0.0173169
Lamp2	3.25235	0.00501771
Akr1b3	1.97537	0.0210475
Tmx3	2.54081	0.00447358
Gnas	2.63626	0.0139314
Rtn4	3.61232	0.00198481
Rps26; Rps26-ps1	1.51041	0.0204874
Idh3a	2.2216	0.0229214
Mthfd2	1.84338	0.00581119
Tm9sf3	3.4753	0.00379176
Copb1	1.87422	0.0691776
P4ha2	2.18475	0.0257569
Cpne3	2.16826	0.0107241
Fus	0.941784	0.0228279
Uba1	2.2457	0.015478
Ctsd	2.90002	0.00204041
Psma7	2.4338	0.0119148
Cct5	1.88741	0.0912065
Maob	1.6222	0.0266885
Gcn1l1	2.23026	0.0573696
Nceh1	3.60955	0.00194581
Rpl9	2.4979	0.0114595
Vps29	2.34249	0.0121258
Wls	3.81417	0.00493908
Prdx2	2.9423	0.00398021
2021-09-11	2.27396	0.0318313
Rps7	2.23063	0.0127391
Sdhb	2.98689	0.0262415
Rps16-ps2; Rps16	2.33523	0.00978951
Ewsr1	0.880116	0.0402041
Rpl11	3.05035	0.0111477
Cox5a	2.29504	0.00950096
Acads	2.31983	0.0211933
Dhcr24	2.50297	0.0219297
Mtch2	3.33582	0.00955886
2021-09-02	3.00966	0.0109332
Immt	2.04943	0.0352599
Copa	2.20236	0.0929668
Slc38a2	3.34767	0.00260718
Rhoa	2.56713	0.00718367
Fh1	2.13949	0.011071
Clptm1	4.36666	0.00234316
Nsdhl	3.54936	0.00122046
Tmem43	3.27045	0.00253938
F5	2.80439	0.00703857
Fasn	1.92674	0.109341
Pcbp2	2.59857	0.00435872
Hnrnpu	1.64183	0.0590154
Ctsl	2.18434	0.0169492
Nsf	2.08784	0.0325353
Acta1	2.6895	0.0144457
Ptgis	3.18285	0.0102986
Fau	1.01489	0.220005
Acsl1	2.10017	0.036631
Uqcrfs1	2.2034	0.0119377
Hnrnpa1	1.98386	0.0293995
Rps20	2.63609	0.0203226
Ilvbl	2.45313	0.0195946
Atp13a1	3.1999	0.0143907
Cyb5r1	2.7402	0.0091525
Cox4i1	3.08382	0.004986
Ralb	2.38038	0.00180616
Erp29	2.31414	0.00457583
Aldh3a2	2.98519	0.00239222
Rab5c	2.78536	0.00242201
Ctsb	2.75607	0.00468059
Pdcd6ip	2.34536	0.012115
Sptlc2	3.49412	0.0177869
Rab5a	3.15906	0.00265947
Soat1	2.45923	0.0643173
Sec62	1.67321	0.048608
Pycr2	1.91506	0.0404554
Cdc42	3.12475	0.00202357
Pmpca	2.25902	0.0391986
Pafah1b1	1.87993	0.0105153
Rps4x	2.6029	0.0223133
Rpl13a	2.44103	0.00995716
Sqrdl; Sqor	2.52374	0.0236336
Ncln	2.45838	0.0275972
Bcat2	2.51525	0.0569897
Rpl3	2.68529	0.0472157
Rab34	2.47343	0.00953521
Kpna2	2.62798	0.0190672
Rps15a	3.1659	0.0111962
Mmp14	2.14696	0.00587516
Rac1	2.58993	0.00973005
Vapb	2.77695	0.00348026
Ank	2.84605	0.00293049
Mrpl15	2.44932	0.00673253
Mesdc2; Mesd	1.8439	0.0077064
Letm1	3.44449	0.0022942
Hsd17b11	2.7976	0.0150498
Itga5	2.1348	0.000911726
Gnb2	2.65671	0.0277242
Sod2	2.46608	0.00518042
Tm9sf2	3.2775	0.00412209
Cct2	1.84541	0.0831014
Sfxn3	2.66056	0.0117874
Slc12a2	2.67177	0.00534683
Arcn1	2.25581	0.0226658
Ptbp1	2.31078	0.0111637
Rpl6	2.43037	0.0113057
Emc1	2.43101	0.00750706
Phgdh	2.58198	0.0101205
Vcam1	2.79792	0.00225861
Esd	2.52144	0.0267885
Timm23	2.88221	0.00562614
Gpi1	2.31793	0.0107163
Tpt1	2.54075	0.00731226
Iars2	2.08118	0.0298588
Ctnna1	1.8302	0.0329734
Nap1l1	2.68596	0.0187974
Pccb	0.580123	0.621337
Pgd	2.07022	0.0158084
Pgam1	2.8805	0.00950812
Dpm1	2.01301	0.0256116
Surf4	3.23132	0.00977782
Mpdu1	3.54848	0.000150911
Rab9	2.84359	0.00465515
Gna11	2.49891	0.0104373
Psmb5	2.26384	0.0112526
Anxa3	2.05746	0.00981644
Vps13c	0.673639	0.700258
Cisd2	2.73023	0.00449773
Npc1	4.78567	0.000614597
Ddb1	2.20946	0.0202188
Hsd17b10	2.72004	0.00337909
Arhgdia	2.46009	0.00316118
Mtch1	1.31552	0.134287
Atp6v1a	2.16988	0.0247239
Tomm70a	2.72503	0.0276565
Cpd	2.72428	0.00442723
Gdpd1	2.73718	0.00112982
Il1rl1	3.03353	0.0182994
Rps6-ps4; Rps6; LOC105244208	2.34305	0.0280943
Hnrnpa2b1	2.35332	0.0259789
G6pdx	2.25315	0.0255433
Atp1b3	2.9085	0.00118801
Atp5j2	2.37141	0.00918908
Atp5l	2.78854	0.00243007
Acp2	4.10444	0.000430265
Emb	4.40823	0.0067223
Mtap	3.00511	0.0184912
Rpl31	1.98466	0.0149109
Itga6	2.7249	0.00292962
Cds2	2.70399	0.0106409
Rab6a	3.05714	0.00274497
Arl1	2.81345	0.0027929
Alcam	1.75798	0.00629577
Srprb	3.60331	0.000923359
Mut	2.11495	0.0421643
Ndufs1	2.2493	0.026603
Hmgb1; Gm21596; LOC100862258	2.45428	0.0765145
Tm9sf4	3.26787	0.00445165
Rpl17	2.20544	0.0258757
Ano6	2.69595	0.0147851
Ybx1	1.06951	0.00611619
Rpl24	1.9889	0.0269037
Rpl10a	1.96006	0.0476922
Arl8a	2.98306	0.0073384
Fkbp10	2.63768	0.00617505
Hadh	2.67934	0.00817707
Fdft1	2.69099	0.016517
Timm50	2.67792	0.0220143
Naca	1.95597	0.0419841
Bgn	2.39338	0.00209843
Cers2; Lass2	4.08737	0.00183502
Etfdh	2.168	0.0170363
Mogs	2.41872	0.00641946
Sec61a1	2.08174	0.0216298
Actn4	1.82967	0.0661531
Rpl8	2.30291	0.0348696
Ppic	2.55534	0.00495909
Calu	1.84382	0.0427931
Rpl7a	2.40665	0.00699925
Trim28	2.09398	0.0156028
Rpl18	2.51576	0.00421544
Ptges	3.10784	0.00298627
Pck2	2.2648	0.0227961
Gnai2	2.89211	0.0188841
Mrpl27; Gm6304	1.88572	0.0460174
Cycs; Gm10053	2.08024	0.00591428
Echs1	2.41431	0.0133997
Hnrnpab	2.60209	0.0151993
Strap	2.53171	0.013537
Uso1	2.36458	0.0629367
Cpt2	2.41076	0.0157474
Psmb2	2.17766	0.0186645
Nrp2	2.66789	0.00969529
Mfn1	2.00821	0.0881417
Arpc4	2.09464	0.0176776
Dlk1	3.66647	0.00125986
Pls3	2.23633	0.00810656
Spcs3	2.61417	0.00363181
Rpl26; Gm15772	2.54431	0.00835723
Tmx2	3.15571	0.0059325
Fbln2	2.89811	0.0105363
Acaca	0.416258	0.689505
Slc2a1	4.00569	0.00514663
Tsfm	2.10834	0.00556228
5730469M10Rik; Fam213a	3.05307	0.00117092
Cers6; Lass6	3.86104	0.0212656
Plxnb2	2.47588	0.0111435
Scarb2	3.34858	0.00106981
Rps27; Gm9846; Rps27rt	2.17866	0.0238441
Efemp1	3.09788	0.00543961
Fen1	2.10075	0.0466911
Sqle	2.29355	0.0177157
Prl2c2	2.8653	0.0027498
Apmap	3.00698	0.00214482
Mrps35	1.93622	0.0533979
Acsl4	2.05068	0.0426409
Hist1h1b	0.617041	0.166551
Gsto1	2.4133	0.018363
Sacm1l	2.31789	0.0198041
Rpl5	2.41253	0.00700659
Gsn	2.44861	0.0239371
Tor1b	2.60682	0.00941275
Sec61b	3.02924	0.00306402
Clpp	2.88346	0.00744408
Hmox1	3.02144	0.00526258
Kdelc2	2.12519	0.00903043
Ivd	2.34282	0.023304
S100a4	2.80379	0.00268726
Psma6	2.2317	0.0141035
Sec11a	2.57302	0.00951615
Capns1	2.62317	0.00702458
Ywhaz	3.10256	0.00623592
Cacybp	3.43268	0.0133726
KRT5	0.968982	0.0803973
Nucb1	3.10822	0.00276994
Psmb3	2.37815	0.0135753
Eci2	2.67594	0.00771107
Capn2	2.29065	0.0335269
Ndufv1	1.96615	0.0566532
Alg5	2.83055	0.0078343
Stx8	2.66601	0.0102184
Slc1a5	3.83493	8.65494e-05
Nmt1	2.65983	0.00743449
Ermp1	2.9277	0.00400328
Rps8; Gm15501	2.3688	0.0197429
Rab23	2.34214	0.0216287
Eno3	2.62122	0.0233988
Slc25a30	2.1848	0.0826023
Fam3c	3.4212	0.00137656
Apool	2.1873	0.0115357
Pigt	2.50967	0.014473
Eif4e	1.70847	0.0199493
Acbd3	2.74269	0.0198953
Lmna	1.43201	0.116745
Yipf3	3.02413	0.00636193
Acot2	2.32886	0.0178965
Sc5d	2.27333	0.00574179
Tmx4	3.52786	0.00633212
Acaa1a	2.53119	0.00236369
Vps26a	2.35499	0.0121206
Alyref	0.718996	0.03781
Aup1	2.58835	0.0138512
Asah1	2.65159	0.00376423
Krt73	0.144098	0.833036
Sgpp1	3.28419	0.0224862
Pcna	2.84611	0.0146038
Ssr4	3.36566	0.0267667
Pign	3.289	0.0013914
Katnal2	1.96994	0.101618
Uqcr10	3.22884	0.0450805
Ostc	3.27048	0.00190163
Gcat	2.27713	0.0565887
Cox5b	2.37061	0.00458238
Ahcy; Gm4737	2.14351	0.0279715
Psmc6	3.14911	0.053226
2021-09-09	2.47601	0.0348511
H13	3.96919	0.00251395
Tln1	1.68547	0.0413438
D17Wsu104e; Mydgf	3.13867	0.0026707
Slc25a22	1.6941	0.0639315
Psmd1	2.32927	0.038221
Psmd11	2.03546	0.0250735
Ssr1	4.40421	0.000895665
Glg1	2.6349	0.00355734
Iqgap1	2.08534	0.0457259
Scarb1	3.18722	0.00157318
Tardbp	3.11369	0.0117587
Stt3b	2.15002	0.0378255
AFP	1.94061	0.00404148
Snx27	2.16287	0.0257317
Kdsr	3.68815	0.00181991
Epha2	2.84247	0.0130835
Atp6ap1	3.51136	0.00162121
H2-D1	4.06961	0.0081057
Api5	2.42294	0.0209728
Cope	1.8866	0.0393366
Stom	2.27525	0.0154117
S100a10	2.80761	0.00471181
Ppp1ca	2.4395	0.0185602
Lnp; Lnpk	2.92239	0.00202118
Dcakd	2.55351	0.009631
Rcc2	1.97418	0.0555291
H60b	3.31145	0.00171564
Sh3glb1	2.81509	0.00623837
Psmd8	2.83027	0.00697652
Paics	1.69331	0.139798
Mrps9	2.00226	0.0198964
Rps17	2.11162	0.0557767
Fkbp11	2.21927	0.00311387
Ociad1	2.95787	0.00443654
Mrpl28	2.47248	0.00512452
Cers5; Lass5	3.09361	0.0120412
Slc15a4	3.72051	0.00128906
Rps12	2.03078	0.0107194
Sccpdh	3.499	0.00491277
Cdh2	2.64068	0.010683
Stx12	2.88355	0.00663171
Ndufa4	3.23664	0.0045708
Ndufa10	2.10508	0.0303404
Gnaq	2.65816	0.008023
Rnh1	2.48726	0.0267705
Amacr	3.43629	0.00793417
Sfxn1	2.72174	0.0100134
Ghitm	2.4791	0.0191127
Rab32	2.37022	0.00355643
Ndufb5	2.49633	0.00326066
Fubp1	2.48776	0.019303
Eef1d	2.62993	0.0133095
Cav1	5.27151	0.00154708
Tmx1	3.40696	0.00333102
Fkbp8	2.75561	0.0212565
Ict1; Mrpl58	2.74899	0.0382129
Rhog	2.94396	0.00914401
Gsr	2.20595	0.0245104
Comt	3.3671	0.00954821
Adpgk	2.9464	0.00738809
Rpl15	3.0196	0.00964463
Pmpcb	1.87053	0.0434537
Rpl22; LOC100047372; LOC100504863; LOC102642602	2.34581	0.0107065
Aldh9a1	2.36386	0.0427625
Rpl36	2.21876	0.00850984
Arf6	2.68348	0.00916164
Ptcd3	1.95121	0.0640025
Marc2; Mosc2	2.56651	0.0203949
Lpcat3	3.13433	0.0163387
Slc25a20	3.6711	0.000731024
Mrpl13	2.45834	0.00354466
Col1a2	1.8496	0.0149275
Prdx6	2.3613	0.00276873
Tmem11	2.57259	0.0218478
Sigmar1	2.63903	0.00397227
Tmed5	3.57111	0.0182697
Fkbp9	2.23556	0.00367116
Sar1b	3.33372	0.00503644
Eif4g1	2.425	0.0216234
Mrpl11	1.64635	0.0208446
Tmem63b	1.27208	0.0470963
Me2	2.05941	0.0327946
Ddah2	2.26211	0.0109633
Armc10	2.53191	0.00336918
Cisd1	3.4487	0.00521361
Ezr	1.3867	0.0514471
Etf1	2.15832	0.0406162
Il6st	3.08509	0.0146552
Degs1	4.01664	0.000337357
Dpm3	2.18106	0.00545389
Rab31	2.96314	0.00139837
Cox6b1	1.47334	0.0249806
Hmox2	3.08597	0.00691862
Cyb5b	4.94891	0.00582523
Vcl	2.45055	0.00639707
Ddx6	2.09699	0.0154616
Psmd3	1.67258	0.0273737
Psmd2	2.10347	0.0527993
Psmb4	2.56105	0.00333532
Crp	2.15348	0.00423959
Uap1l1	2.51075	0.020578
Ruvbl2	2.05143	0.0270828
Rab1; Rab1a	3.64414	0.00362709
Galnt2	2.71559	0.00556671
Rps19	2.09334	0.06228
Actr3	2.38096	0.0730551
Atp2a1	2.44941	0.00623208
Galnt1	4.30229	0.002793
Mrpl4	2.6741	0.0109552
Colec12	3.83177	0.00236449
Rab33b	3.02015	0.00302871
Prmt1	2.01427	0.0643553
2410015M20Rik	3.06052	0.00687942
Atp1b1	1.64746	0.0395469
Tor1aip1	3.11647	0.00793273
Lamc1	1.83996	0.0053075
Slc25a11	2.23645	0.0213904
Gpx8	3.04686	0.00255363
Gaa	2.54992	0.00245877
Vamp2	3.79137	0.00202489
Ptk7	2.93358	0.00421347
Stx7	3.00413	0.00346324
Rpl21	2.74775	0.00719904
Rab35	2.56347	0.0074793
Dhrs1	2.81966	0.00807178
Gng12	2.41089	0.00856044
Mrpl55	2.50729	0.00618083
Actr2	2.2965	0.0431075
Iqgap2	0.90233	0.177657
Osbpl8	0.874864	0.178669
Tmem106b	3.069	0.0034295
Tnpo1	3.00934	0.0207025
Abcb10	2.28009	0.0113036
Rheb	2.27044	0.00463892
Hsph1	2.40171	0.0325158
Rras	3.11628	0.00934609
Atp6v1c1	2.34956	0.00701657
Plin2	3.70898	0.0550725
Cpne1	2.29221	0.0291866
Mrpl19	1.8809	0.0103943
Ergic2	2.40969	0.0166381
Spcs1	3.15641	0.00474973
Atic	2.56096	0.0804718
Tmem147	2.75746	0.0114623
Dnajb11	2.77613	0.00386263
Rdx	2.11033	0.0176147
Ece1	3.56832	0.00329996
Pcbp1	2.49483	0.00315382
Eif2s3x	1.95053	0.0306859
Copz1	3.00057	0.0125621
Cyp39a1	2.70901	0.0234693
Ddx39b	2.42655	0.00291907
Mia2	2.01368	0.00251014
Yipf4	3.40761	0.0024199
Tubb4b	2.30836	0.0292189
Mrps5	1.78256	0.0137317
C1qbp	1.30796	0.0091578
Tmtc3	2.67162	0.0312655
Mrpl35	2.11763	0.0578489
Capzb	2.44132	0.0208288
Pdxdc1	2.35326	0.0217339
Mtx1	3.12896	0.0149691
Tomm20	2.60589	0.00244054
Sdcbp	1.95847	0.143919
Arfgap1	2.73114	0.0094922
Uqcrq	2.36643	0.00365761
Apoo	3.23597	0.00429001
Rpl32; Rpl32p	2.03778	0.0140024
Pef1	2.73268	0.00668503
Rcn3	1.52983	0.016133
Plod3	2.51009	0.0190474
Gars	2.15863	0.0310787
Dnaja2	1.7682	0.0292614
Atl2	2.86655	0.0299454
Serpinb6a	2.51586	0.0239181
Praf2	3.54031	0.00426491
M6pr	4.08284	0.00852248
Prkcsh	1.54183	0.00397254
Sec63	2.22324	0.0319175
Atp6v0c; Atp6v0c-ps2	4.14014	0.0018091
Tecr	2.33893	0.0377867
Vkorc1l1	5.18064	0.00123744
Ikbip	2.1174	0.0091072
Mrpl39	2.36342	0.0117363
Cyb5; Cyb5a	2.82453	0.00462421
Fkbp4	2.03099	0.0105017
Spg21	2.66387	0.0157131
Abcc1	2.89164	0.0101888
Psmd6	2.00669	0.037035
Yars	2.33715	0.00705023
Vamp8	4.06633	0.00202499
Il1rap	2.74982	0.00322207
Ech1	3.87739	0.00138207
Agpat1	2.23489	0.0107413
Slc16a1	2.28027	0.0117748
Cox7a2l	3.19066	0.00350444
Abce1	2.13985	0.0477269
Eif3i	2.01003	0.0456053
Ncam1	2.71296	0.00688452
Tmem245	2.12616	0.0188918
Gpr107	4.03839	0.00300118
Ywhaq; LOC102634437; Gm11226; Ywhaq-ps3; Cdk5rap2	3.46615	0.0140889
Gdi2	2.58282	0.0134715
Acot7	2.1878	0.0234048
Ndc1; Tmem48	3.29051	0.00851123
Mrps15	2.06643	0.0293831
Idh1	1.88596	0.0654614
Ppp2r1a	2.20807	0.0190512
Asns	2.05345	0.0263167
Sub1	1.09722	0.084418
Prep	1.94177	0.0359138
S100a6	2.74848	0.0466448
Tmed9	2.12215	0.00366528
Sdhc	3.0033	0.012557
Mia3	2.05698	0.0223546
Gnai3	2.87998	0.0154664
Ptrf; Cavin1	1.48316	0.015082
Osmr	2.85016	0.000292742
Emc2	2.62966	0.0280465
Ndufa5	2.03589	0.0165653
Ncstn	3.5009	0.00171868
Ywhag	3.09572	0.0156623
Asna1	2.70643	0.0168099
Psma4	1.99449	0.0131991
Tubb6	2.25192	0.0232974
Rpl35a-ps4; Rpl35a; Rpl35a-ps2; Gm10243; Rpl35a-ps5; LOC100862595; Gm14279; LOC100048620	2.80623	0.00191671
Hibch	2.34902	0.0113331
Scamp3	3.48268	0.000378265
Zadh2	2.30549	0.00884237
Arf4	2.64012	0.00766808
Ugt1a6a	3.02433	0.00395413
Sppl2a	3.14479	0.000490766
Dnajc5	3.85759	0.00179472
Pi4k2b	2.38789	0.00605962
Cpt1a	2.37245	0.0339818
Gtf2i	1.67456	0.0539235
Pdcd6	2.75247	0.0003859
Cbx3	1.98564	0.0140556
Mrc2	3.25743	0.00740539
Tbrg4	1.99042	0.0337224
Slc35b2	2.97866	0.0057897
Epb4.1l3; Epb41l3	2.10795	0.0162687
Slco2a1	3.33427	0.00337255
Slc48a1	2.30736	0.0223202
Opa1	1.92613	0.0409702
Vta1	1.4123	0.0957999
Emc7	1.33399	0.0855675
Lpgat1	2.70511	0.0346907
Rpsa; LOC100045332; LOC100505031; LOC102642689	2.03226	0.00896856
Rpl13	2.78467	0.0304851
Rpl38; Rpl38-ps1; Rpl38-ps2	2.12232	0.00640686
Tpbg	2.44239	0.0295872
Glud1	2.2419	0.042462
Lepre1; P3h1	2.30046	0.0103411
Acadsb	2.16573	0.0260375
Ndufa9	2.8806	0.00303412
Rab5b	2.77915	0.0107436
Pds5a	1.29442	0.122157
Hint2	2.33932	0.00706566
Arl4c	0.574091	0.298464
Txndc12	2.18537	0.0149468
Rbm3	1.78933	0.0392612
Adam9	3.07294	0.000304734
Aqp1	3.26251	0.00499691
Abcb1b	3.73245	0.00528889
Capza1	2.21205	0.0136632
Rab12	2.92647	0.00758135
Mrps28	2.28096	0.0901956
Eif5; LOC100047658; LOC102641436	2.11455	0.0213063
Clic1	2.57456	0.0263967
1110057K04Rik; Ldah	4.95511	0.000654061
4732418C07Rik; Efcab14	2.41379	0.0163339
Ftl2; Ftl2-ps	2.02167	0.0338605
Aaas	2.49275	0.0424368
Slc7a1	3.657	0.000438341
Pon2	2.99892	0.00197107
Mrpl21	2.02296	0.0127947
Ugdh	2.32027	0.060844
Nipsnap1	2.55185	0.0128803
Ano10	2.30048	0.0286389
Ptpn1	3.22069	0.0227297
Rps14	2.99658	0.0671845
2021-09-07	2.43296	0.0492856
Ppap2b; Plpp3	3.18809	0.00869964
Itm2b	3.05205	0.00184685
Hspa13	2.59121	0.00182599
Pdk3	1.578	0.0154071
Psma5	2.40352	0.00403885
Hnrnph1	2.0998	0.0296316
Cox7a2	3.31208	0.00129864
Hpcal1	3.21356	0.0013546
Hgsnat	2.77429	0.00739399
Atp6v0a1	2.80307	0.00935507
Ak2	2.34261	0.0125293
Plscr3	3.30629	0.00196158
Rps23	2.34236	0.0345241
H6pd	1.97896	0.0225155
Bsg	5.35462	0.000249845
Ppid	1.91011	0.0139945
Rab10	2.95371	0.00384681
Cdipt	2.58398	0.0083223
Impa1	3.03913	0.0186512
Sec22b	3.17178	0.0206078
Scpep1	3.08662	0.00849651
Rpl30; Rpl30-ps8; Gm12191	2.22187	0.014397
Glrx3	2.14122	0.0148904
Srpr	2.01112	0.0266731
Psmb7	1.43987	6.5735e-06
Mbnl2	2.20265	0.0171899
Dad1	3.34495	0.00118561
Gpaa1	3.47737	0.00365857
Tmem59	1.89882	0.0494115
Npc1l1	4.15008	0.000846146
Krt76	1.18048	0.124568
Pon3	3.04513	0.00157389
Pdhx	2.11332	0.0205039
Rpl27a	2.70077	0.017783
Lmf1	2.76578	0.0133233
Acsf2	2.27492	0.0209101
Poldip2	2.30813	0.0414558
Arpc1b	1.59758	0.0384971
Apob	3.2316	0.0608191
Serpinf1	2.80765	0.00687328
Slc38a4	3.51844	0.00427159
Thy1	1.99916	0.00361865
Hsd17b7	3.14368	0.0108905
Basp1	1.07815	0.048753
Agpat3	2.58371	0.018523
Psmc2	2.28867	0.0355049
3110001D03Rik; Tmem261; Dmac1	3.35461	0.00348745
S100a11	4.08972	0.00152671
Mrpl2	2.58313	0.0265661
Cd44	2.96048	0.0250433
Lox	3.23294	0.0245808
Pdlim1	1.81796	0.0220601
Abhd12	2.56592	0.0306397
Tomm22	4.07684	0.0014518
2021-03-05	2.19838	0.0416577
Slc17a5	2.58661	0.0215758
Fitm2	2.53535	0.0408704
Rras2	1.79693	0.0243097
Epb4.1l2; Epb41l2	2.13406	0.019286
Rps24; LOC677113; LOC102642752	2.17616	0.0267336
Ccdc109a; Mcu	2.16628	0.0124979
Galnt4	3.30632	0.00146298
Mrps22	2.30836	0.008892
Tmem120a	2.74039	0.0398829
Rhot1	2.4673	0.031482
Ankle2	3.31834	0.0127124
Ufc1	1.62127	0.160399
Csde1	2.16036	0.0368594
Cox7c; Gm12338; LOC100048613; LOC102642884	2.5062	0.00745762
Lamtor1	3.25275	0.00769573
Timm44	2.17776	0.0143458
0610031J06Rik; Glmp	4.03214	0.0143169
Mif	2.50324	0.0156254
Crtap	2.51601	0.0126155
Rap2b	2.91391	0.00396014
Pigk	3.45189	0.0232637
Ap1g1	2.67938	0.0717017
Scfd1	2.12345	0.0398423
Ndufs3	2.45812	0.00893273
Vamp7	2.97357	0.0100998
Grb10	2.3406	0.0343198
Hibadh	1.77882	0.0272406
Crabp1	2.30364	0.0205801
Endod1	4.67032	0.000745519
Rfc2	1.75921	0.0309173
Psmc4	2.1043	0.0385623
Ctsa	2.33335	0.0194867
G3bp1	1.94801	0.0162846
Npepps	2.12269	0.027213
Ywhab	2.42337	0.012874
Mrpl1	2.25761	0.00294016
Bak1	3.93439	0.00403947
Pi4k2a	2.3804	0.0347615
Idh3g	2.37085	0.0470354
Rdh11	2.91393	0.00842603
Cask	1.65298	0.0213459
Slc1a4	3.38608	0.0034611
Atp5k	3.04918	0.00123082
Ethe1	2.33102	0.00712387
Slc44a2	4.21832	0.00373429
Vps26b	2.65448	0.0177795
Ndufb10	3.18014	0.0146321
Naalad2	2.89656	0.00435252
Mrpl22	2.90888	0.0105934
9530068E07Rik	3.27058	0.0040803
Ufl1	1.60817	0.0426219
Rap1a	3.52083	0.0115357
Arpc2	2.32721	0.0286085
Sptlc1	3.42432	0.00860171
Htra2	2.55219	0.02135
1110008F13Rik	2.1511	0.0451691
Tmem63a	3.67058	0.00810178
Emc4	2.71603	0.00344715
Amfr	1.75829	0.00760579
Impdh2	2.83408	0.0168524
Bnip1	2.90532	0.00874735
Tmpo	3.31416	0.00794464
Rap2c	3.06397	0.00184358
Dap3	2.13512	0.0263574
Stx4a	2.87938	0.0152652
Flnc	2.12635	0.0521877
Myadm	3.14384	0.00468045
Derl1	3.63061	0.00671065
Ifitm2	3.90935	0.0018676
Bax	3.45921	0.000866771
Nradd	2.63714	0.0206509
Rpl39	1.2994	0.0802271
Acsl3	2.27785	0.041584
Srp68	1.70002	0.101779
Dpy19l1	0.966877	0.151958
Vim	1.578	0.0184344
Atp6v1b2	2.31977	0.0192693
Axl	2.51656	0.0114793
2010107E04Rik	2.76897	0.0114149
Clcn5	2.84814	0.026151
Hk1	2.4683	0.0258356
Serbp1	1.81731	0.0728783
Ctnnb1	1.79732	0.0137504
Esyt2	2.251	0.0663301
Dhodh	3.28194	0.0113903
Psmd14	1.86563	0.0167412
Thbd	2.77143	0.00669327
Mrpl32	2.21689	0.0567984
Usp5	2.1005	0.0727856
Mrps27	2.47887	0.0284046
Pdzd8	1.66918	0.024138
Cd9	4.06644	0.00212769
Dnajc11	2.52403	0.00738136
Mxra7	3.13707	0.00236211
Cd276	2.92923	0.0179452
Ap2m1	1.63897	0.0618666
Nqo1	2.87381	0.00104676
Tmco1	2.91758	0.0232038
Pttg1ip	3.01215	0.0152225
Zdhhc20	3.562	0.000809887
Kpna3	1.35191	0.0717969
Kpna4	1.91702	0.0351994
Hist1h2bb	0.502316	0.187621
Nup155	1.92625	0.0875915
Cox6c	2.3547	0.00271067
Psmb6	1.83679	0.00251006
Serinc3	2.94718	0.00651446
Mthfd1	2.24111	0.0244937
Acsl5	2.45199	0.0274652
Spryd7	2.8905	0.00429597
Plod1	3.52627	0.0363959
Aars	2.31078	0.0131513
Rala	2.70516	0.00282655
LOC102631912	2.70081	0.00330875
Rab4b	2.84414	0.00634471
Fundc2	3.06238	0.000807425
Pak2	0.992701	0.134719
Asph	1.82716	0.0141359
Gnao1	3.1006	0.00850425
Slc44a1	4.18816	0.00160038
Atad1	2.83226	0.0288476
Arfrp1	2.54364	0.0179625
Atp6ap2	2.71791	0.000531193
Agps	2.29105	0.0468549
Ddx4	0.76782	0.13009
Kdelc1	1.96998	0.016035
Lxn	2.66937	0.00521523
Emc3	2.29916	0.00685939
Arl6ip5	3.81941	0.00378368
Fam129b	2.2985	0.0344115
Plxna1	2.34346	0.0141085
Rps28	2.08849	0.0984843
Mrpl38	2.93416	0.00690376
Ccdc47	1.74056	0.0354176
Pofut2	2.10955	0.00394155
Sco2	2.68197	0.0100673
Mcm6	1.53083	0.0995809
Crat	1.82408	0.0233444
Mrpl24	1.87531	0.00587848
Snx9	2.58697	0.0295604
Tmem167	3.0448	0.00195116
Ppt1	3.36789	0.00381304
Pabpn1	1.74445	0.0422486
Rtn3	3.01503	0.00137442
Cndp2	1.857	0.00506722
Mrpl44	2.16164	0.0225811
Mrpl53	2.45589	0.00984855
Gla	2.27275	0.00994872
Tspan6	4.02831	0.000965963
Ywhah	2.97355	0.00959663
Mrpl34	0.97793	0.0297257
Cept1	1.74757	0.0928158
Mypop	3.10499	0.00176702
Slc6a11	3.68167	0.00610558
Set	1.42	0.0198238
Npm1	2.18698	0.0384969
Itm2c	3.08949	0.00799378
Zdhhc13	3.73885	0.00448593
Rcn1	1.57603	0.0721598
Qsox2	2.71733	0.00148815
Psmc1	1.63073	0.0818576
Csnk2a1	2.37846	0.0193766
Hat1	1.79603	0.120149
Mrps21	1.8581	0.0167013
Nars	2.48269	0.0478243
Galnt7	1.18707	0.286859
Tm7sf3	2.10948	0.0356333
HBA1; HBA	2.75973	0.00811399
Fn1	2.06822	0.0125793
Hist1h1e	1.21242	0.144207
Ap1m1	1.81969	0.0532206
Glipr2	2.59963	0.0347425
Psma1	2.05375	0.00423525
Pdgfra	2.78419	0.019016
Mrps23	2.61694	0.00610421
Sars	1.80992	0.0112085
Sar1a	3.467	0.0171821
Fam162a	2.4916	0.00358
Mrpl45	1.27541	0.0145639
Osbp	1.81963	0.0436789
Dtymk	2.36219	0.018078
Timm17a	3.00007	0.0272244
BC017643	0.996227	0.202335
Igf1r	2.50641	0.00674146
Fam114a2	2.72965	0.0315137
Tmem168	3.1764	0.0127937
Gtf3c2	-0.00175287	0.998419
Dhcr7	2.18345	0.00106937
Nrp1	2.37674	0.00749823
Snap23	2.57023	0.00990405
Mrps11	1.93246	0.0659027
Fscn1	2.12261	0.0134321
Psmb1	2.30106	0.01032
Pigu	2.75009	0.00640649
Bcl2l1	2.96451	0.000895681
Abcb11	2.14168	0.0580203
Esyt1	2.47478	0.0159648
Erap1	2.33084	0.00273671
Sec31a	2.17376	0.0335375
Lamtor3; Gm5900	2.98142	0.0114176
Trnt1	2.14939	0.0250156
Mrpl43	1.83747	0.000284203
Adam10	2.67371	0.0036904
Pld3	3.02619	0.000926795
Dars	1.87647	0.0661014
Anp32b	1.59019	0.0910926
Rpl10; Rpl10-ps1	2.35378	0.0360995
Nudt9	1.47123	0.0902405
Hmga2	1.87984	0.0153363
Prkar1a	1.88915	0.0149747
Nptn	5.21707	0.000826642
Atp6v1h	2.70183	0.0223916
Nid1	2.43423	0.0274036
Mcm7	2.14704	0.062856
Slc35a1	3.04699	0.004627
Cox10	1.93573	0.0296847
Slc12a4	2.37761	0.0426657
Mrpl9	2.28079	0.00872963
AI597468; Tmem263	2.72878	0.00533623
Abcb8	2.48301	0.00419987
Tmem206	1.59306	0.109261
Emc6	2.31013	0.00972765
Fndc3a	1.78129	0.0210907
Ldlr	2.57046	0.00136443
Ranbp1	2.21773	0.018597
Fdxr	1.66243	0.00714431
Ccdc115	2.92459	0.00979793
Slc7a6	2.42571	0.0012912
Marcks	0.0952832	0.885883
Psen1	1.9987	0.0387871
Cdc37	1.49328	0.110188
ORF61; Tmem259	4.10892	0.000373058
Sumf1	2.03071	0.0142375
Ptpra	2.68578	0.0186498
Nadk2; Nadkd1	1.75945	0.0220804
Ppap2a; Plpp1	1.74133	0.0129119
Trim59	1.69716	0.0458442
Ube2j1	2.73827	0.00786537
Naa15	2.03524	0.057065
Dhrs7	2.92424	0.00263532
Fis1	2.78254	0.0161069
Hmgcr	2.24321	0.015684
Fbln5	2.19851	0.0073288
Ptgr1	2.2999	0.000104241
Slc38a1	1.88702	0.00799355
Cst3	2.27942	0.00387449
Rplp2	2.24934	0.0121106
Ptges3; Gm9769; Ptges3-ps; LOC100048119; LOC102641464	2.34286	0.0630446
Scamp1	3.58486	0.00106373
Ddr2	2.3051	0.00141517
Tmem65	2.92451	0.0176069
CYTB	2.98897	0.0158362
Gabarapl2	2.12603	0.0368848
Zyx	1.53344	0.0262817
Pebp1	2.06601	0.0158825
Mpp1	2.61934	0.0151588
Clint1	0.922714	0.224238
Dync2h1	1.49774	0.0647127
Tmem126a	3.21733	0.00235394
Hars2	2.6899	0.0196964
Sgcb	2.18805	0.0278399
Naa50	1.90985	0.0325716
Slc29a1	3.27038	0.000429297
Cdk1	3.02869	0.0152574
Plaa	2.30327	0.0433122
Taldo1	3.78922	0.0162234
Tmem87a	3.42892	0.00138718
Hexa	2.03053	0.0322054
Mospd2	3.03918	0.0103853
Hras1; Hras	2.68547	0.00536882
Xdh	2.00587	0.0460257
Clta	2.47348	0.0315974
Kdelr1	1.9909	0.0430879
Slc5a3	3.62537	0.0101181
Ddx5	1.75634	0.0333249
Aprt	2.10025	0.0200541
Slc25a1	2.01594	0.0195322
Tor1a	1.72628	0.0446072
Mxra8	2.79802	0.0155634
Acox1	2.71615	0.0165645
Wfs1	2.13992	0.0521991
Ap2a2	2.18288	0.0587109
Cant1	1.82577	0.0565763
Mrpl12	1.94427	0.00402647
Ssr3	3.06264	0.000998977
Tmem165	3.88036	0.00514702
Gadd45gip1	1.9112	0.0151425
Ube2g2	2.02573	0.00392145
Chpt1	2.93518	0.011283
Hmgb2	1.71259	0.081002
Tkt	2.67478	0.0136216
Col1a1	1.86539	0.0380848
Aifm2	2.11305	0.0338447
Faf2	2.53179	0.0081663
Preb	2.05794	0.00651999
Tram1	1.98239	0.0181362
Igsf8	2.34492	0.0161467
Synj2bp; Gm20498; Synj2bp-cox16	2.91142	0.000164437
Fam198b	1.72763	0.035828
Eif2s1	2.28117	0.0168716
Ly75	2.67483	0.0317833
Dazap1	2.14575	0.00272306
Irgm1	2.79449	0.00839742
B3gnt1; B4gat1	3.22925	0.0119791
Cnn2	2.04062	0.0168291
Tial1	2.69681	0.00260889
Slc6a8	3.65893	0.0308231
Atpaf1	1.24222	0.177828
Gja1	2.12528	0.0234101
Slc2a8	3.22666	0.00229463
Tmem55a	3.54251	0.0140134
Picalm	1.98336	0.00626753
Hspa1l	1.79381	0.0310339
Fgfr1	2.52379	0.00397553
Dhrs9	2.63525	0.0144494
Timm17b	4.37248	0.00527582
Stub1	1.79656	0.0411351
Dpy19l3	1.85988	0.0597135
Mfsd1	1.98953	0.0204132
Laptm4a	4.58644	0.00020422
Clcc1	3.47971	0.0219795
Mrpl37	2.47047	0.0146798
Cnn3	2.40898	0.0149502
Tmed4	2.3477	0.00371427
Timm22	3.87092	0.00787464
Dstn	2.31792	0.0147704
Rars	2.00651	0.0640125
Ahsa1	2.69362	0.0132114
B2m	2.1744	0.00831187
Ubxn4	2.65849	0.00778504
Arpc5	2.28048	0.010482
Fam63a; Mindy1	2.59937	0.00701049
Mrpl20	1.86759	0.0424796
4930471M23Rik; Slc35f6	3.18164	0.00814241
Tmem199	3.76977	0.0154011
Bag6	2.89434	0.0135052
Sfn	2.29407	0.0100901
Ptplad1; Hacd3	2.22705	0.0379503
Tmem97	5.43871	0.00172917
Mrpl10	3.22269	0.0301182
Ap1b1	2.18239	0.0232323
Tagln2	3.23398	0.00548162
Coro1b	1.17279	0.0701526
H2-Ke6	1.86209	0.00358528
Rbbp4	2.06454	0.0585844
Farsb	1.37381	0.111649
Mtdh	1.98298	0.0181705
Mrpl46	1.97128	0.000518249
Ppa1	2.51865	0.0173819
Cad	1.60698	0.0637831
Lamp1	2.38263	0.00271397
Psma3	1.91918	0.0139427
Gopc	2.14069	0.0248911
Mgst1	3.24048	0.002763
Clic5	2.2433	0.00911295
Syvn1	2.68019	0.0026815
Acsf3	1.67702	0.0754096
G6pc3	2.8781	0.00844669
Gspt1	1.3683	0.0378233
Hsdl2	2.06945	0.00410586
Ahcyl1	1.23352	0.0832827
H2-D1	2.9542	0.00608955
Scamp4	3.03028	0.00336963
Ufd1l; Ufd1	2.29958	0.0113174
Nploc4	2.06722	0.0330413
Hccs	3.85206	0.0103297
Hs2st1	1.53324	0.00897374
Macf1	2.46878	0.00688856
Ipo7	2.39464	0.0513889
Mdh1	2.49686	0.00820319
Dnajc1	2.33931	0.00169187
Cnpy3	1.85264	0.0569601
Crlf1	2.21223	0.0225567
Bcap31	3.72898	0.0068839
Kars	1.86302	0.038873
Akr1a1	1.9406	0.0111213
Akap2; Gm20459; Palm2Akap2; Pakap	2.19958	0.077887
Rpl18a	2.92831	0.0198987
Slc35a2	3.15544	0.00203065
Mcm2	2.02222	0.0889897
Man1a2	2.60338	0.00998371
Dync1h1	1.7351	0.180491
Pqlc3	2.60702	0.0125179
BC003331	2.28523	0.0371216
Ndufb9	2.41168	0.0120321
Fads1	2.67493	0.0211131
Golga5	1.94612	0.00401329
Pkd2	2.20976	0.047522
Gcdh	2.08114	0.0706279
Clptm1l	2.9822	0.0124875
Fech	2.13298	0.014136
Hprt	1.43691	0.041609
Spcs2	2.54306	0.00436968
Ier3ip1	3.60273	0.00175677
Dpp7	2.5784	1.14459e-06
Csrp2	1.72023	0.102301
Stx5a	2.37914	0.0110759
Man1b1	2.47216	0.00519707
Bub3	1.8112	0.0214121
Sae1	2.19917	0.0238186
Idi1; LOC102635781; Gm38481	2.54047	0.0127027
Erlin2	2.47653	0.0116906
Dynlt1b; Dynlt1f; Dynlt1c; Dynlt1a	2.49945	0.0414504
Mrps34	1.2025	0.183714
Zfyve27	1.61673	0.0736773
L2hgdh	2.8389	0.0332562
Tpp2	2.48091	0.0607867
Vti1b	2.37863	0.00363878
Sec61a2	1.49043	0.0532806
Plbd2	2.50745	0.00394563
Golm1	2.11831	0.0172939
Nln	2.53858	0.0198341
Gxylt1	2.71531	0.0166136
Arl2	1.35698	0.0506645
Hspa4l	2.7497	0.0834774
Mrpl23; Mrpl23-ps1	3.59293	0.00935098
ATP8	3.60272	0.000416175
Ugt1a7c	2.40446	0.0136226
Cnbp	2.24837	0.0262945
Vma21	4.34837	0.00111754
Grn	2.01841	0.0165991
Eif4h	1.89461	0.00997266
Cstf2	2.42021	0.00660109
Nedd4l	2.46274	0.0054218
Plscr1	1.24855	0.385659
Nup93	0.680958	0.241316
Ndufaf1	0.902152	0.353443
Gns	2.46524	0.0413429
Cd63	4.32873	0.000206562
Rangap1	1.28512	0.110158
Cd81	3.70033	3.17675e-05
Nucb2	2.40734	0.0164327
Ndufa11	2.82789	0.00573588
Rrm1	2.14621	0.0120443
Sugt1	1.27697	0.0171013
Coa3	2.75146	0.0781995
Pgp	1.67457	0.0857119
APOA1	5.13131	0.0116762
Flot2	2.54577	0.0184869
Eif4b	1.92482	0.0357519
Mrpl18	2.66756	0.00877363
Slc12a9	2.32755	0.0269681
Opa3	3.18583	0.00856277
Cln8	2.88466	0.0332389
Rragc	2.01419	0.0685353
Lmbrd1	4.39766	0.00132495
Mcm4	1.90315	0.0533534
Uqcr11	3.08263	0.00099172
Rabac1	3.37193	0.00319162
Tapt1	1.86416	0.0579364
Baz2a	1.2887	0.081425
Mrpl50	1.71335	0.0195169
5033414D02Rik; Plgrkt	2.37936	0.00599694
Eif3j1; Eif3j2	1.57092	0.019757
Atp13a3	2.32923	0.0129734
Pam16	1.94763	0.0287794
Arxes1; Arxes2	2.55017	0.0676589
Tm9sf1	2.37656	0.08417
Twf1	1.27914	0.0863521
Nipsnap3b	2.50114	0.0161232
Lmf2	2.73798	0.054797
Lpp	1.47115	0.0927307
Hdhd3	2.46428	0.0704617
Sec23a	1.09723	0.0873231
Tmem160	2.04391	0.0965887
Ssbp1	1.37914	0.0457305
Mrps31	1.92828	0.0544355
Hdac1	2.34447	0.0807789
Ak3	2.28377	0.00695332
Pcolce	2.45925	0.00168428
Sf1	1.22796	0.0369444
Ctps	2.04007	0.045196
Capn1	1.96628	0.0409704
Gyk; Gk	2.1331	0.0243076
Faf1	2.57673	0.0333862
Ipo4	1.53815	0.00961553
Slc33a1	2.82923	0.00388419
Ikbip	1.87688	0.0019436
Ppm1l	2.36016	0.00139396
Tmem14c	1.9985	0.0738237
Gstp1	2.56404	0.0259796
Abhd16a	2.65568	0.0160454
Chchd2	2.75007	0.00435751
Slc4a7	2.83047	0.00072618
Chst14	3.20116	0.00496952
Cc2d1b	1.63646	0.0802032
Stard3nl	2.72443	0.0118944
Psme3	2.33001	0.0274057
Ilf2	1.50569	0.0903446
Clpx	1.8171	0.0548108
Ephb3	2.46311	0.0367529
Mat2a	2.35026	0.0183902
Tm2d2	3.14498	0.00276652
Rab22a	1.70126	0.0102206
Sumo3	1.64792	0.0463671
Rps18	2.0269	0.0110372
Lamtor2	1.49987	0.0519334
Nt5dc3	1.02521	0.0273085
Cldn25; Cldnd1	2.60869	0.00754495
Atp6v1e1	2.01296	0.00297454
Nrd1	1.73257	0.140879
Ubap2l	1.86755	0.0560915
Rpl37a	2.43613	0.0117212
Prkaca	2.11378	0.0564629
Bckdha	1.83393	0.0237078
Tspan14	3.97314	0.00386817
Spryd4	2.20454	0.0172155
Aldh7a1	2.35354	0.0169529
Jagn1	2.84709	0.00318549
Capg	2.04799	0.0422052
Ttyh3	4.17048	0.00237555
Eif3e	1.90629	0.0461188
Gls	0.525177	0.409761
Atxn10	2.07199	0.0323957
Tmed1	1.6595	0.142648
5730494N06Rik; Tmem230	3.87966	0.00280104
Nme4	1.34557	0.0183605
1810037I17Rik	5.10281	0.00913688
Snx3	2.25848	0.0528603
Mboat7	2.69566	0.00657951
Got1	2.51773	0.0157872
Nenf	3.5128	0.0193446
Rbm14	1.39222	0.0226419
Bcs1l	1.73009	0.123457
Tmem109	3.9182	0.0020528
Fam173a	1.978	0.0108007
Ergic3	3.38943	0.00181724
Usmg5; LOC100504912; LOC102642507	4.24221	0.0018328
Pvrl2; Nectin2	2.23176	0.0301088
Ube2v2	2.56445	0.00100729
Hnrnpl	1.8127	0.0607465
Qk	1.32958	0.0690578
Ggcx	2.70031	0.00429436
Gpr108	2.88931	0.0185696
Ndfip2	1.91504	0.0363156
Hnrnpa0	1.86029	0.0225166
Plin3	3.0048	0.0226838
Mrpl16	1.99967	0.00878842
Ppp1cc; Gm5601	2.91023	0.0417932
Spr	2.19479	0.0344623
Hck	1.29809	0.0108956
Hars	1.20489	0.010737
Mccc2	1.32071	0.0243925
Ccdc167	2.1663	0.00534675
Mgst2	2.63189	0.00213369
Erlec1	1.45209	0.0384622
Cdk4	1.84165	0.02323
Pcyox1l	2.47414	0.0302708
Dnajb12	2.9032	0.0120522
Plp2	3.33589	0.00165284
Srp54a; Srp54b	1.16539	0.0486722
Fbxo6	2.1977	0.0313204
Gorasp2	2.65519	0.0377008
Csnk2b	2.07038	0.0110254
Ruvbl1	1.76133	0.0601007
Tmem177	1.62668	0.080775
C1galt1	2.66507	0.00479036
Ctsz	1.19965	0.131361
Adss	3.06686	0.00860182
0610007P14Rik; Erg28	2.71686	0.0091996
Pgm2	2.6836	0.00494914
Tspan9	2.58077	0.0839939
9430016H08Rik; Maip1	1.82328	0.0151295
Pygl	2.13044	0.00281537
Agk	1.32564	0.0105121
Dnpep	2.14333	0.0127928
Rab27b	1.43723	0.0616921
Slc4a2	2.06174	0.00171652
Psmc3	2.10361	0.0742125
Psmc5	2.11174	0.0523652
Ide	1.67394	0.00143461
Slc41a3	2.03634	0.0421666
2610029G23Rik; Pbdc1	2.26981	0.00220384
Copz2	2.70679	0.0082813
1700047I17Rik2; Fam177a	2.69394	0.00388984
Tmem87b	2.92524	0.00911389
Eif4a2	1.43104	0.0517982
Ero1l	2.32185	0.00441393
Lipa	2.50841	0.0255954
Ap2s1	2.16215	0.0313339
Rhob	2.41407	0.00571069
Alg2	2.46191	0.0258902
Bace1	3.58597	0.00473667
Tmem19	4.2335	0.00377355
Snrpa1	1.63907	0.113796
Cr1l	2.07167	0.062356
Ephb2	2.05025	0.00120206
Saysd1	3.83831	0.000595928
Reep5	4.33498	0.000254994
Pnkd	1.52923	0.0954798
Cars	1.83937	0.0820108
Dag1	2.36984	0.0148116
Tspan4	2.45677	0.00650489
Retsat	1.84486	0.00258494
Frrs1	3.00442	0.00273969
Gas1	5.12372	9.07489e-05
Eif4a3	1.49366	0.00240463
Dgat1	1.52021	0.171139
Ube2m	2.26309	0.0259623
Txnl1	2.48697	0.00769111
Slc38a7	2.904	0.00750718
Vamp3	2.41463	0.0398686
Pofut1	2.03649	0.0538993
Xpo1	2.53147	0.0185912
KRT6C; KRT6A	1.51596	0.0980405
Eif4g2	2.55854	0.0216447
Golga7	2.27843	0.0427527
Sdpr; Cavin2	1.33939	0.0810323
Mpp6	2.09741	0.0117559
Ctnnd1	2.04979	0.0442726
Sypl	1.56861	0.162628
Flot1	2.07054	0.0211115
Rps5	1.45591	0.0162596
Ndufs2	2.63803	0.0109631
Ube2k	2.65583	0.0219315
Procr	2.89529	0.00317966
Ipo5	1.93689	0.0249027
Asl	1.82631	0.010931
Tmem192	2.47009	0.0195288
Pacsin2	2.25138	0.0312601
Aldh5a1	2.17179	0.0404571
Flvcr1; Mfsd7b	2.11669	0.0026612
Sel1l	3.30887	0.00164899
Tmem173	2.58363	0.0051925
Rbp1	2.67333	0.0106668
Mrps2	1.46391	0.000801145
Slc39a6	1.96483	0.00538886
Timp1	2.20005	0.00181227
Atrn	2.20221	0.0252242
Timm8a1	2.38563	0.0639173
Uba2	1.56142	0.0153671
ND1	2.18994	0.0244612
Gas2l1	2.75589	0.114957
Stx6	2.32282	0.00408941
Aph1a	2.92886	0.000193892
Mfsd5	3.84744	0.0027795
Sidt2	2.32933	0.0102226
Vkorc1	3.0983	0.00239024
Akap1	2.6931	0.0102662
Eif3b	1.49578	0.0261462
Bri3bp	2.51835	0.00887537
Rab3gap2	2.23192	0.0139762
Rdh14	1.62	0.00839347
Clcn7	2.26953	0.00148339
Nup35	2.32066	0.00121875
Nrm	3.02999	0.00918028
Vasn	2.85905	0.0120878
Ndufb3	1.82519	0.00517028
Stam2	2.03331	0.00957318
Ube2n	3.64311	0.000380511
Fam49b	2.34074	0.000670557
Stoml2	2.99517	0.00621785
Mfsd10	3.15252	0.00354058
Rer1	2.65722	0.014341
Tmem129	2.68087	0.00618674
Tmem104	3.28853	0.00506216
Rnf149	1.99415	0.126437
Lpar1	2.16822	0.0208807
Ipo9	2.5197	0.0527487
Arpc3	2.09457	0.0976246
Sepsecs	1.63971	0.0980735
Gpr137b	2.79559	0.0218339
Myh9	2.10391	0.0465388
Strn3	1.51	0.0110174
Ola1	2.3345	0.00271356
Cand1	1.77835	0.0920518
Ndufc2; LOC102641347	2.66013	0.028044
Dnajc10	1.57718	0.0396836
Mapk15	2.2639	0.0940692
Cnih4	2.94274	0.00404024
Prkca	2.10377	0.0471287
Hnrnpm	1.58611	0.080244
Btk	1.97767	0.0522256
Slc25a17	2.46577	0.0123509
Dolpp1	2.55459	0.0446489
Zdhhc6	2.52326	0.0125446
Eif3g	1.15273	0.298871
Ndufv2	2.09537	0.0307625
Dirc2	2.07176	0.0202274
Sgta	1.40222	0.114704
Rab3gap1	2.45071	0.0131462
Stard9	1.6794	0.0862615
Txn1	1.81935	0.00673025
Metap1	2.12306	0.0107017
Ndufa3	2.8718	0.00758122
Copg2	2.00193	0.0157444
Mecr	2.08967	0.00199116
Tmem70	1.80928	0.0978
Antxr1	1.10073	0.0805791
Yars2	1.67359	0.093322
Dpysl2	1.34557	0.0880732
Tubb2a	2.37094	0.0289371
2021-03-06	3.44452	0.00168574
Itch	2.47286	0.105227
Slc30a7	2.18606	0.0220538
Rab3c	1.75534	0.0471413
Mrpl47	1.94994	0.00445522
Acat2	2.06266	0.0017772
Sdc4	3.30101	0.00499387
Derl2	2.5403	0.00998486
Fth1	1.16318	0.0073528
Apoa1bp; Naxe	1.98674	0.0600156
Krt80	0.949868	0.159111
Ptrh2	2.0056	0.0476403
Rap2a	2.88324	0.00391224
Tmlhe	1.53141	0.091805
Pafah1b3	2.10636	0.0706405
D10Wsu52e; Rtcb	1.95375	0.0673223
Dnajc3	1.86409	0.0838987
2410091C18Rik; Ndufaf7	1.89619	0.0410785
Nfs1	2.37345	0.0172394
Rab4a	2.32869	0.0680303
Golt1b	3.1359	0.0403072
Sgcd	2.0038	0.052057
Smpd2	2.10804	0.141231
Emc8	2.31462	0.0218697
Mocs1	1.66371	0.00968957
Cd47	1.58139	0.00534566
Srp14; LOC100504988; LOC102642637	1.96933	0.0402056
Tnfrsf1a	2.24093	0.0242001
Fkbp2	2.39338	0.0113099
Gm12942; Tmem35b	1.43231	0.0816652
Rplp1	3.03391	0.0640953
Tdrkh	2.00457	0.0237061
Setx	2.191	0.0283262
Grsf1	1.89104	0.0634552
Ppp2ca	3.05918	0.0168377
Farsa	2.23655	0.0175599
Swap70	2.12906	0.057946
Ehd2	2.03853	0.0379538
Fxr1	1.72668	0.0454483
B3galnt1	1.49693	0.162159
Khdrbs2	1.36943	0.109121
Rdh10	1.70713	0.01789
Elovl1	1.96146	0.0287817
Eral1	1.95034	0.0270258
Capn6	2.25365	0.0375849
Atp5e	1.53035	0.00605745
Tpp1	2.456	0.0168962
1110001A16Rik; Cebpzos	3.15483	0.0168973
Mmp2	1.95465	0.0679756
Tmem55b	2.81677	0.0116005
Psma2	1.93393	0.0168528
Scamp2	3.51477	0.0041311
Smpd4	2.16733	0.0164756
Mrps16	1.57396	0.0912603
Mybbp1a	2.65124	0.0356091
Rexo2	1.68875	0.031603
ND4	2.5293	0.015853
Arhgdib	2.48856	0.00303607
Rftn2	2.8205	0.0022994
Txnrd1	2.23667	0.00621634
Acly	2.58906	0.0210844
Coq4	2.93889	0.0267645
Strn	1.69562	0.0173194
D10Jhu81e; LOC100046684; LOC102641949	1.95918	0.0363781
Tor1aip2	1.71787	0.0532755
Prpf19	1.85196	0.0620743
Fcgrt	2.52057	0.0192015
Mrps10	1.59873	0.018719
Txnrd2	1.80413	0.0409969
Lrrc1	1.95242	0.0434195
Lsg1	1.79434	0.038377
Uchl5	2.2174	0.120602
Prkacb	2.65585	0.00969422
Wdr1	1.77809	0.0652391
Gpt2	1.27183	0.0257242
Metap2	1.63963	0.0392828
Ehd1	1.87228	0.0533106
Fkbp3	2.11512	0.0263595
Megf8	1.69943	0.0958407
Slc39a11	3.14166	0.00560881
Abcb7	2.0658	0.0534384
Glb1	1.56384	0.0204788
Ptbp2	1.34387	0.202174
Alg11	1.85391	0.0538749
5430435G22Rik; Rab7b	2.01397	0.0444223
Naa25	1.75543	0.110609
Slc19a2	3.08049	0.00808916
Kras	1.76573	0.10127
Magt1	1.83543	0.0131533
Serhl	1.40242	0.112193
1300001I01Rik; Cluh	2.95289	0.0159099
Sarnp; Gm6563	1.70516	0.0349525
Ptrh1	1.99862	0.150991
Aacs	1.47502	0.0729126
Hgs	2.51829	0.0170162
Ssb	2.13593	0.0359992
Krt14	1.59588	0.194987
Ldhb	1.98162	0.034946
Jak1	1.66904	0.115103
Vars2	2.82013	0.0262102
Cav2	3.36921	0.0142127
Dclk1	2.30116	0.0329993
Vps13a	1.54558	0.13204
Pgk2	2.42149	0.0075435
Mcm3	1.82183	0.0660165
Src	2.51143	0.0258394
Xrn2	1.45673	0.0785338
Gmps	2.24102	0.0289876
Hmgcs1	1.75135	0.0517866
Sil1	2.03987	0.029214
Slc7a5	2.99072	0.00394357
Vwa8	2.06945	0.027832
Use1	2.03784	0.0299024
Dpy19l4	2.71031	0.0238721
Ndufs8	2.18546	0.0332865
Thumpd1	2.11203	0.00706028
ND3	2.46147	0.0141984
Fzd2	3.02805	0.0144919
BC017158	2.02066	0.0513992
Tollip	2.14168	0.0392223
Agpat9; Gpat3	2.57994	0.0221996
Rragb	2.90804	0.000948322
Ptges2	2.21224	0.0536147
Mrps18a	2.04442	0.00784518
Dysf	2.43208	0.0330973
Chmp6	2.00964	0.112661
Pigs	1.72905	0.138882
Tgfbr3	2.9297	0.0134497
Uqcrb	1.73662	0.0206236
Tspan3	1.66296	0.0503981
Ap1s1	2.19831	0.0754713
Ddx1	2.77658	0.0163625
Epn2	1.44631	0.153296
Fundc1	2.18303	0.0680659
Mrps33	1.33867	0.0220432
Apbb2	2.24522	0.045324
Rttn	2.31259	0.0110459
Itprip	1.61996	0.0207616
Agpat6; Gpat4	1.93112	0.0144298
Hdlbp	2.64151	0.0102607
Gm10177; Sec61g; Gm11575; LOC102637269; Gm4184	2.95318	0.027914
Fads3	1.6352	0.0356517
Abca3	2.5326	0.00929104
2010107H07Rik; Smim4	2.76781	0.0218922
Bckdhb	1.33597	0.277963
Tmbim6	2.31988	0.0344641
Rhot2	2.35173	0.0510565
Cpe	1.82889	0.0188326
Tceb1; Eloc; LOC101056616; LOC102642819	1.86945	0.0238466
Serinc1	3.20196	0.00873555
Camk2d	1.30234	0.0561154
Gosr1	2.7329	0.00764113
Fkbp1a	1.37155	0.0812645
Nudt12	1.74567	0.0926052
Mrps6	1.86985	0.0503724
Osbpl9	1.47378	0.0763954
Pml	1.67096	0.028261
Syngr2	2.05377	0.0798286
Palm	2.0778	0.00353312
Trim32	1.93011	0.00790839
Tmem119	2.68342	0.00415263
Mgrn1	2.512	0.0105888
Tuba1a	2.34433	0.0669948
Ndufa2	2.6013	0.0132246
Ndufb8	3.05791	0.00430262
Nup50	2.092	0.00988288
Atp6v1g1	1.87702	0.0150823
Wbp2	1.74252	0.129315
Fxyd5	1.18417	0.210655
Hnrnpll; Hnrpll	1.91543	0.0817944
Cox15	1.95241	0.0563325
Rpl19; Rpl19-ps11	1.56385	0.0271944
Cse1l	2.335	0.155298
Vmp1	1.77702	0.16199
Eif1ax	1.51614	0.121859
Hmgcl	2.23046	0.0129168
Srsf4	2.4555	0.0311558
Antxr2	2.87148	0.0018439
Napg	1.91702	0.00579596
Glod4	2.07496	0.00902694
Bcap29	2.24241	0.0153837
Plod2	1.74078	0.0041398
Myl12b	3.03621	0.00723971
TF	2.2536	0.0143499
Eps8	1.08211	0.159789
Nov	1.25417	0.0248667
Bcl2l13	3.14651	0.00396089
Msh2	2.72052	0.0247298
Caml	2.17757	0.0330959
Zfpl1	1.2904	0.265545
Slc38a10	0.930781	0.329026
Gm3244; Ndufb4; Gm3873	2.22153	0.00503628
Ap3s1	1.90232	0.0201891
Pgs1	1.31614	0.23747
Tmem238	3.2171	0.0931418
Slc6a9	2.42594	0.0619
Dlg1	2.03471	0.000691832
Slc11a2	2.12639	0.0790654
Xpnpep3	2.09039	0.0580055
Samm50	1.50506	0.0975037
Exd2	1.85027	0.0126751
Rad23b	1.64057	0.0147458
Prkar2b	2.24036	0.0701122
Necap2	1.99193	0.00541284
Yipf5	3.06533	0.0440069
LOC101056446; H2-D1; LOC102641613	3.2187	0.0058071
Mapre1	2.12454	0.00453737
Myl6b	2.28058	0.0362248
Apex1	2.1542	0.0403542
Psmd5	1.84519	0.0138267
Stxbp1	1.78858	0.0357766
Sec13	2.42807	0.0496605
Eif2s2	1.67387	0.0443576
Tmem175	1.71987	0.0464351
6330416G13Rik; Tmem268	2.23365	0.010649
Prnp	2.8263	0.0248229
Rhbdd1	2.29428	0.0328351
Eif2ak3	1.28198	0.121685
Glrx5	1.34901	0.237115
Sfxn5	1.79356	0.106063
Ssu72	2.18927	0.029562
Ap3b1	2.55784	0.00937748
Jup	1.82936	0.0293896
Gprc5a	2.45121	0.0144562
Itga3	3.19841	0.0182949
Gde1	2.68603	0.00516978
Abcf1	1.03842	0.266569
Nckap1	1.68594	0.0754201
Rbbp7	1.34029	0.205398
Cyfip1	2.14084	0.0110483
Mvp	1.4647	0.0244844
Eef1d	2.68153	0.0101922
Ube2d3	2.06041	0.123465
Mrps17	2.65313	0.00295575
Hnrnpa3	1.58763	0.0467481
Aldh6a1	1.97053	0.0186003
Stk4	0.871163	0.0832642
Atf6b	2.06646	0.0143484
AI480653; Xxylt1	1.65009	0.0861386
Taco1	2.06359	0.020683
Tm7sf2	1.90261	0.00902864
Txndc15	2.13013	0.0173434
Edem3	1.76928	0.0169162
Ext2	2.11984	0.00940192
Lasp1	1.93606	0.0321069
Ebp	2.62203	0.00269773
Tapbp	1.86455	0.0282973
Gcsh	3.2532	0.00415476
Atp6v0a2	2.10807	0.00363314
Tmem115	3.06765	0.000222275
Afg3l2	1.51986	0.0330719
P2rx4	1.77952	0.0346358
Thbs2	2.34447	0.0470699
Slc1a3	2.92462	0.0273019
Rrbp1	1.45901	0.0623406
Rpa1	1.40741	0.244891
Psmd12	2.4034	0.0260576
Lpcat4	2.37098	0.022157
Gstm1	2.86803	0.010034
Pfas	2.10961	0.032812
Snx6	1.49768	0.0749193
Acot1	2.39962	0.00347436
Abhd5	2.58865	0.01007
AI314180	1.66835	0.0887536
Lta4h	1.9832	0.0214995
Fam20b	2.14328	0.041746
Yif1b	2.09092	0.0187993
Srrm2	1.77162	0.05312
Mrpl3	1.98874	0.0105262
Spns1	2.45375	0.011183
Yes1	2.37349	0.00859029
Hsdl1	2.58837	0.00581957
Itfg3; Fam234a	2.37444	0.033504
Cops4	2.45287	0.0488476
Dnajc19; Dnajc19-ps; Gm15118	2.6831	0.00347735
Gprc5b	2.55081	0.0034612
Mrps7	1.67995	0.0457839
Atp5j	1.79275	0.0450984
Pitpnb	2.48231	0.0105012
Crot	2.54961	0.0942007
Papss1	2.19846	0.0176357
Tmem205	2.57695	0.00725294
Slirp	2.73939	0.0494838
Ppif	1.89887	0.0236241
Slc12a7	1.89914	0.031324
Nudt4	2.38495	0.031614
BC031181; LOC102641497	4.04026	0.00526865
Mrpl14	2.11701	0.0381711
Scamp5	2.71243	0.00894117
Abhd1	1.88719	0.0277114
Eva1b; Fam176b	2.1984	0.000937503
Tars	2.4562	0.016276
Abcg2	1.61344	0.166528
Dnajc25	2.55315	0.0168453
Rab43	2.26658	0.0274707
Gak	1.90669	0.0052815
Ptp4a2	1.70073	0.11835
Nup188	2.13251	0.0233426
Gna13	2.33356	0.00461404
Osbpl3	1.69807	0.111064
Luc7l2	0.773273	0.478731
Psmd13	1.68579	0.0870951
Snrpd2	1.69636	0.00260489
Eprs	2.0864	0.0218834
Blvrb	2.07092	0.0279962
Erp44	1.84451	0.0552514
Rps10	2.18752	0.00202651
Cpox	2.18756	0.108905
Snrpd1	1.42028	0.0430423
Isoc2a	1.80874	0.0959157
Rab13	2.79735	0.00969789
Srm	1.13516	0.209069
Farp1	1.47183	0.0137438

## Sheet: Fig_4C
Gene_Symbol	log2_fold_change	p_val
Wbp2	0.76629	0.310818
Gsn	1.70561	0.303218
2010107H07Rik; Smim4	2.95419	0.0102408
Abcb6	0.253744	0.864346
Slco3a1	1.33061	0.0449293
Rftn2	0.421322	0.652057
Gas1	2.07278	0.00497942
Laptm4a	1.59056	0.148259
Bri3bp	1.29373	0.0291621
Tmem97	4.96507	0.00010499
Tmem238	3.76892	0.00426633
Cav1	3.90046	0.0029246
Vkorc1l1	3.68242	0.0061847
Bsg	3.64252	0.0141739
Tmem199	3.10979	0.00934811
Kdelr1	3.1298	0.0165175
1110057K04Rik; Ldah	2.95516	0.00870977
Timm17a	2.33126	0.0300933
Cav2	2.82038	0.00240815
Npc1	2.69918	0.0164138
Ephx1	2.8026	0.0091788
Nptn	2.71177	0.0190128
Ube2d3	1.79044	0.0715622
Atp6v0c; Atp6v0c-ps2	2.24011	0.0225698
Kdelr2	1.31126	0.343407
Slc25a30	2.64452	0.00695097
Vdac2	2.83123	0.0148194
Vdac1	2.64507	0.0152902
Dpy19l1	1.14043	0.403173
Emb	2.35505	0.00499619
Scamp5	1.63275	0.12538
Crls1	1.27076	0.122715
Alg10b	1.51859	0.207785
Actr3	1.05425	0.222861
Sgcb	1.27073	0.137938
Abcb1b	2.26957	0.0523848
Cd63	2.35967	0.0114777
Itprip	0.504144	0.741807
Acot1	1.79453	0.0227978
Gyk; Gk	1.87259	0.0775668
Slc25a20	2.03843	0.0101209
Tm7sf2	0.486349	0.705933
Tspan6	2.1722	0.00124832
Prkaca	1.40915	0.0568265
Pgs1	0.9943	0.350401
Rab3d	1.09958	0.213413
Cnih4	1.26689	0.120773
Golt1b	1.96087	0.0352876
Gpr107	2.26896	0.0251361
1110001A16Rik; Cebpzos	1.98555	0.0186663
Ghitm	1.25223	0.084467
Dpysl2	1.51749	0.110694
Tmem14c	1.7957	0.136272
Syngr2	2.22515	0.0353806
Lmbrd1	1.78948	0.0548197
Yif1a	0.862473	0.327082
Arxes1; Arxes2	2.00909	0.0029795
Galnt4	1.9768	0.000406249
H13	1.86506	0.038185
Rtn3	1.85071	0.008779
Flnc	1.60024	0.0364393
Tmem109	1.912	0.000163401
Kdelr3	1.31409	0.254072
CYTB	1.78701	0.0144105
Lpar1	1.8101	0.00518395
Myadm	0.769768	0.423372
Tspan11	2.05994	0.0388389
Galnt1	1.94198	0.00696088
Slc6a8	1.02188	0.186716
Ptplad1; Hacd3	1.19531	0.0692524
Slc44a1	1.83718	0.00833333
Ndc1; Tmem48	1.50484	0.223783
Reep5	1.8732	0.0134441
Tmem87a	1.75849	0.00800239
Dpy19l4	0.932306	0.548099
Pnkd	0.660404	0.408956
Derl2	1.18276	0.160282
Usmg5; LOC100504912; LOC102642507	1.18234	0.190402
Degs1	1.88625	0.0167748
Clptm1	1.72038	0.0317162
Ggcx	1.20732	0.228268
Rce1	1.23189	0.0529207
Wls	1.89065	0.0118126
Dirc2	1.46861	0.0794117
Timm17b	1.74567	0.0377235
Trim32	0.481739	0.563473
Ndufa11	1.58896	0.0141667
Dhrsx	0.914182	0.169683
Rpl18a	1.69374	0.0197535
Eif3g	1.36932	0.115081
Scamp2	1.7704	0.00127499
Prkaa1	1.35421	0.0307619
APOA1	1.50095	0.282003
Endod1	1.89993	0.0109537
Sec23b	0.898732	0.246304
Zfyve27	1.21621	0.30565
Acp2	1.61065	0.031056
Rbbp7	0.894597	0.345099
Slc35b1	1.09829	0.230273
Mpv17	1.73066	0.0309458
Mtch1	1.5889	0.051934
Gdi2	1.28135	0.0305547
Pign	1.50087	0.0606334
Iars	1.52355	0.0388391
Grm1	1.57699	0.033381
Cers2; Lass2	1.71354	0.0183364
Cyb5b	1.77623	0.0441936
Slc15a4	1.80051	0.0131114
Ap2a1	1.68534	0.018556
Mapk1	1.53029	0.0535416
Capn6	1.71551	0.0240935
Arpc2	1.58336	0.117841
ATP6	1.38987	0.0384637
Cd151	1.61973	0.0170727
Ywhaq; LOC102634437; Gm11226; Ywhaq-ps3; Cdk5rap2	1.42522	0.0288582
Slco2a1	1.54737	0.0556173
Slc38a2	1.54368	0.0245648
Tmbim6	1.78029	0.0415497
Nsdhl	1.70289	0.0252637
Lpcat3	1.5462	0.0544074
Stt3b	1.27114	0.0921239
Cd81	1.75829	0.0289366
Sptlc1	1.53001	0.0343475
Copb1	1.33064	0.0426035
Rpl15	1.5081	0.0117811
Ppt1	1.21031	0.11928
Slc7a1	1.65484	0.0208461
Bckdhb	1.39764	0.0434922
Zdhhc13	1.80518	0.0236214
Gpr89	1.20908	0.0884948
Vmp1	1.32054	0.0563841
Rps19	0.929535	0.258843
Adck1	1.00393	0.0718644
Eif4g2	0.643708	0.576835
Scarb1	1.40129	0.0577862
Tecr	1.12303	0.213536
Uqcr11	1.30499	0.0849758
Dhcr7	1.47879	0.0105182
Syvn1	1.55051	0.0133416
Adck5	1.53304	0.00192343
Rplp0	1.33468	0.0498885
Tmem115	0.965317	0.201696
Mpdu1	1.53798	0.0399835
Atp7a	1.42798	0.0120997
Dync1h1	0.510418	0.734084
Slc16a1	1.63919	0.00647181
Colec12	1.55981	0.013705
Dnajc5	1.55815	0.0321073
4930471M23Rik; Slc35f6	1.57677	0.00689618
Kdsr	1.68476	0.0133818
Elovl1	1.35352	0.0752576
Sc4mol; Msmo1	1.4794	0.039444
Mcm6	1.28011	0.0440105
Dad1	1.62962	0.0197915
Pon3	1.53847	0.0535639
Ech1	1.47873	0.0434265
Sptlc2	1.15277	0.28944
Slc35b2	1.52434	0.0598763
Slc7a5	1.59941	0.0255402
Tmx4	1.33453	0.0485734
Ostc	1.28794	0.0740782
Emc4	1.28491	0.0990995
P2rx4	1.5001	0.0185039
Rpl35a-ps4; Rpl35a; Rpl35a-ps2; Gm10243; Rpl35a-ps5; LOC100862595; Gm14279; LOC100048620	1.41021	0.0664151
Slc5a3	1.48501	0.00470203
Itga3	1.55331	0.00439574
Slc35a1	1.36586	0.0463197
Abcc1	1.43451	0.0158504
Coa3	1.68338	0.0625103
Fitm2	1.52013	0.0854369
Ppm1l	0.962036	0.312033
Pld3	1.17232	0.139424
Slc17a5	1.61334	0.0482449
Derl1	1.2811	0.119823
Pgd	1.56269	0.0889718
2410015M20Rik	1.38637	0.00401182
Spcs3	1.39025	0.0426879
Tm9sf3	1.55275	0.0162485
Tmem63a	1.49514	0.0593084
Tm9sf2	1.45471	0.0246883
Ppap2b; Plpp3	1.30456	0.0256233
B4galt1	1.2437	0.033172
Vamp3	1.58764	0.0316409
Dpy19l3	1.41173	0.00417728
Sgpp1	1.52531	0.0116391
Aars2	1.11818	0.0478571
Yipf3	1.04837	0.189276
Rhob	0.691148	0.621104
Gnai3	1.3824	0.0614709
Eif4e	1.15554	0.0774777
Tmem160	1.41682	0.00165759
Scamp4	1.59088	0.0172785
Fkbp8	1.32168	0.0388725
Elovl6	1.14356	0.184643
Sfxn5	1.46478	0.00178466
Flvcr1; Mfsd7b	1.33203	0.0849546
B3galnt1	1.42317	0.000250271
Gpaa1	1.58011	0.0190652
Asns	1.26367	0.0283829
Ncstn	1.45437	0.0593575
ATP8	1.3332	0.00637682
Pdk3	1.3047	0.0689024
Lmf2	1.40201	0.0204499
Agpat4	1.35658	0.00483626
Rhot1	1.27103	0.0254081
Atp13a1	1.36362	0.10102
Carkd; Naxd	1.03743	0.173943
Gls	1.26507	0.0681131
Ebp	1.40962	0.00217064
Cox7a2	1.27813	0.0560424
Fundc2	1.35598	0.058245
Nt5dc3	1.47692	0.0342588
Wfs1	1.46422	0.0138394
Alg1	0.27301	0.833071
Slc44a2	1.46673	0.092204
Cyfip1	1.57609	0.0642017
Steap1	1.06195	0.211356
Capn1	1.36404	0.054002
Sdhc	1.34014	0.0573156
Clptm1l	1.03743	0.100236
Emc6	1.32492	0.005628
Slc30a7	1.37394	0.105306
Chpt1	1.37846	0.000188928
AI480653; Xxylt1	1.31863	0.00708898
Hgsnat	1.27943	0.0550267
Sppl2a	1.3715	0.024176
Rplp1	1.45837	0.0234913
Tmem245	1.46951	0.0307148
Chst14	1.43187	0.0111073
Praf2	1.36104	0.0854566
Ppp2r1a	1.44093	0.00949974
Zdhhc3	1.49114	0.0680501
Opa3	1.0221	0.340104
Plscr1	0.519564	0.374226
Bcap29	1.40148	0.000994298
Rap2c	1.12723	0.0501122
Golim4	1.07583	0.0680529
Tm7sf3	1.39853	0.0149335
Yipf4	1.41607	0.0295233
Tmx1	1.38812	0.0073288
Stx7	1.39558	0.00649387
Atl2	1.13669	0.0388354
Nploc4	0.801797	0.253455
Cyp51	1.34971	0.0161305
Aqp1	1.37112	0.00511379
Rer1	1.36807	0.0485235
Gpx8	1.20671	0.092197
Cyp2d26	1.39979	0.0368953
KRT16	0.448119	0.918314
Slc1a4	1.5488	0.0179251
Tmem33	1.20351	0.102015
Itm2b	1.2758	0.0111492
Cds2	1.42835	0.0397544
Rhbdd1	1.29525	0.0591596
Ifitm2	1.35252	0.015242
Tmem167	1.40686	0.0269205
Rdh14	0.960721	0.159365
Cope	0.44696	0.522232
Plbd2	1.20773	0.0277987
Ppic	1.44933	0.0293289
S100a11	1.29416	0.0770018
Slc3a2	1.259	0.027097
Rars	1.29524	0.0150705
Zmpste24	1.27662	0.0593644
Srprb	1.26709	0.0579858
Slc29a1	1.47342	0.0317222
Slc6a9	1.59231	0.0370816
Sccpdh	1.44565	0.0263826
Tagln2	1.18594	0.0183482
Fdft1	1.10605	0.0914457
Atp6v1h	1.24705	0.0057155
Akap1	1.32173	0.0460665
Cers6; Lass6	1.32292	0.0165081
Slc23a2	1.11825	0.146799
Mfsd10	1.31214	0.0683965
Cd276	1.50015	0.0195007
Nudt16l1	0.895655	0.0512617
Atf6b	1.67195	0.0677644
Ywhab	1.17982	0.0143088
Bet1	1.00819	0.0548025
Apmap	1.28149	0.0150858
Taldo1	1.2535	0.0468748
Fam20b	1.0922	0.0888897
Scamp1	1.11804	0.0219041
Ppp1cc; Gm5601	1.08308	0.0656577
Ppp1ca	1.41385	0.0118777
Sgta	1.14011	0.0414898
Nceh1	1.1667	0.0762113
Scarb2	1.35293	0.0593747
Spns1	0.410049	0.69512
Cdh2	1.01134	0.133045
Cox7a2l	1.31022	0.0467695
Pigu	1.17112	0.123715
Slc6a6	1.16002	0.0675884
Pkd2	1.22952	0.130449
Ctnna1	0.894109	0.0727908
Rpl8	1.14543	0.0540908
Aldoa	1.21574	0.0936265
Sar1a	1.41256	0.0242938
Abcg2	1.20217	0.0238987
Rab6a	1.21457	0.0791162
Pdxdc1	1.28039	0.00112577
Fis1	1.16268	0.0296587
Trim59	1.31186	0.0288179
Abhd16a	1.22265	0.0683617
Abhd12	1.05264	0.115707
Fam3c	1.34849	0.0308412
Mthfd1	1.11617	0.0274167
Ermp1	1.18623	0.040524
Psmc6	1.12154	0.0618919
Kpnb1	1.29853	0.00860158
Ilf3	0.177192	0.882028
Vamp8	1.2762	0.0570261
Spryd7	1.22061	0.0420379
Slc25a3	1.32346	0.0422795
Ano10	1.15603	0.0289834
Rcc2	1.12975	0.0304548
Cox20; Fam36a	0.724863	0.386972
Pgk2	1.06689	0.0567235
Yipf5	1.27228	0.0621322
Fcgrt	1.27013	0.049294
Cpne1	1.18015	0.0228355
Tmem168	1.18543	0.0502226
Rnf185	1.30137	0.00350566
Cyp39a1	1.13047	0.0897988
Dars2	0.966367	0.0175555
Adpgk	1.1959	0.0341211
Ank	1.17739	0.0312647
Slc12a2	1.14991	0.0918677
Spg21	1.40504	0.0158526
Alg11	1.3089	0.0422527
Fgfr2	0.718924	0.291501
Rangap1	0.224278	0.772223
Zdhhc20	1.22391	0.0857617
Arl1	1.34804	0.0501295
Stoml2	1.09153	0.012217
Tmed10	1.14341	0.0122282
5730494N06Rik; Tmem230	1.27087	0.00215477
Mboat7	0.908177	0.424555
Park7	1.11937	0.0358596
Uso1	1.0681	0.116051
Slc38a4	1.1706	0.0467544
Tmem165	1.44035	0.158524
Cox15	1.12318	0.0760781
Eif2s1	1.22847	0.0185665
Stt3a	1.16012	0.115119
Cdc42	1.17966	0.0537569
Tmem129	0.161381	0.893821
Tmem186	0.993711	0.270446
Tmem119	1.18138	0.0451905
Tmx3	1.12929	0.0462553
Spata7	0.805487	0.189629
5730469M10Rik; Fam213a	1.07604	0.0704037
Cand1	1.53261	0.0853594
Sec61b	1.0939	0.0385603
Kdelc2	1.17052	0.0107793
Hsd17b12	1.10729	0.0812438
Ier3ip1	1.26585	0.0114095
Hmox2	1.08722	0.0661393
Gorasp2	1.00283	0.0797734
Timm23	0.790164	0.310459
Tnpo1	1.04942	0.0676136
Pecr	0.777792	0.254857
Mtch2	1.32926	0.0577519
2010107E04Rik	0.570241	0.455953
Btk	1.14393	0.0426021
Esyt2	1.13295	0.0151812
Scamp3	1.15809	0.0918811
0610031J06Rik; Glmp	1.47916	0.0444996
Tmco1	0.991016	0.148047
Mxra7	1.33895	0.0686888
Mrc2	1.15317	0.0207197
Aaas	1.14935	0.0692099
Fads1	1.04963	0.135203
Dhcr24	1.18657	0.0741029
Pi4k2b	0.989569	0.0452332
S100a10	1.18619	0.0152571
Psmc2	1.05842	0.0118943
Rab2a	1.13119	0.0495811
Cers5; Lass5	1.29252	0.0128925
Vars2	1.09278	0.0547184
Gpi1	1.03339	0.0325451
Atp6v0d1	0.943548	0.204181
Rab3c	1.24352	0.0551041
Kank4	0.972588	0.0502867
Psmd11	1.08548	0.057748
Gcat	1.24523	0.0406929
Hras1; Hras	0.972764	0.0488889
Abcb10	1.09429	0.0407501
Pcyox1	1.17565	0.0582008
Clcn5	0.821574	0.320592
Vat1	1.11032	0.0191617
M6pr	0.550745	0.279838
Bcl2l13	1.1418	0.0399098
Rtn4	1.22163	0.0309485
Rbm14	0.841665	0.348081
Vamp7	0.97564	0.0786236
Atp5l	0.96624	0.140824
Bcl2l1	0.964206	0.0651445
Pdk1	0.910322	0.13769
Ahsa1	1.0389	0.00647167
Flnb	0.986237	0.0256783
Nt5c3	1.15208	0.086638
Surf4	1.30629	0.0613009
2410091C18Rik; Ndufaf7	1.05479	0.00171134
Rap2a	1.11011	0.0239993
Clic1	1.0124	0.173912
Atp6v0a1	1.20807	0.0739544
Comt	1.20353	0.0181152
Prmt1	1.16383	0.0186933
Serhl	0.724272	0.22063
Lpgat1	1.25975	0.0145098
Timmdc1	0.916547	0.178902
Rap1b	1.15818	0.0234741
Osmr	1.15219	0.00487606
Rab23	0.972321	0.11872
Pigt	1.15083	0.0691478
Hsp90aa1	1.14494	0.0220385
Arf6	1.21304	0.0418135
Lclat1	1.19684	0.0426244
Ipo7	1.24551	0.0378329
Tuba1a	1.45386	0.0615123
Mpv17l2	0.795203	0.20263
Sil1	0.788734	0.191373
Atp2a2	1.16535	0.0658129
Pls3	1.31312	0.0467765
Sqle	1.10601	0.0774889
9530068E07Rik	1.15881	0.0373127
Rragb	1.16164	0.0108301
Ndufc2; LOC102641347	1.00168	0.0424323
Bax	1.1338	0.0037457
Hsdl1	0.84414	0.206049
Rpl6	1.02798	0.0258731
Gmps	0.850234	0.162639
Tmem30a	1.17785	0.127577
H60b	1.22763	0.0204024
Eif3j1; Eif3j2	1.16093	0.0534645
Ptges	1.06762	0.109068
Capn2	1.04576	0.0174867
Rps20	0.90281	0.0676102
Zdhhc6	1.34379	0.0380266
Eci1	0.977141	0.0680686
Bcap31	1.11178	0.0346271
Slc1a5	1.25818	0.0195951
Hpcal1	0.224119	0.822614
Anxa4	0.98353	0.0135837
Me2	1.04323	0.0328174
Far1	1.08354	0.070951
Eif3b	0.953067	0.229006
Tmem41b	1.57646	0.108013
Letm1	1.29181	0.0279642
Tm9sf4	1.25742	0.0208558
Lars2	0.281289	0.766957
Rab5a	1.08933	0.0617114
Wdr1	1.02128	0.0279308
Tmtc3	1.07805	0.04805
Cox10	1.1893	0.0850147
Tmem106b	0.937669	0.206615
Asna1	1.02795	0.0747373
Mlec	1.15436	0.0317299
Aldh4a1	0.94635	0.0242219
Mfsd1	1.15799	0.0330554
Ywhag	0.96895	0.0335619
Ddx39b	1.21362	0.0405912
Rdh11	1.13774	0.0245367
Ugt1a6a	1.34444	0.0374612
Tmem126a	1.26639	0.0312713
Hax1	1.08276	0.207347
Tmed1	1.18046	0.182645
Nrp2	0.953552	0.0209943
Ldha	1.13922	0.0427302
Ppox	1.06242	0.165331
Edem3	1.33964	0.123215
Ogt	0.528895	0.481689
Rab14	1.17772	0.0680809
Vapb	0.911935	0.0744798
Lss	0.927128	0.0999119
Alg2	1.1825	0.00899938
Arl8b	0.94094	0.143508
Eef1g	1.05844	0.00986356
Arf4	1.14952	0.0317824
Gna11	1.16539	0.0137183
Pon2	1.14217	0.0456345
Snx27	1.0438	0.0567805
Pigk	1.17254	0.0241249
Tmed2; Gm21540; LOC100862175; Gm10698	1.09811	0.0954183
Procr	1.16576	0.0118952
Map4k4	1.1617	0.00868208
Rab10	0.964724	0.195603
Ncln	0.96309	0.0595286
Hsp90ab1	1.10378	0.0295451
Ndufa4	1.01607	0.0773458
Zadh2	1.05384	0.00222411
Atp6v0a2	1.27415	0.0392904
Crot	1.02796	0.105214
Acsf3	0.766401	0.141612
Rabac1	1.2651	0.0268099
Slc25a11	0.964321	0.106012
Uba1	0.967086	0.0586184
H2-D1	0.868243	0.0954422
Rab8a	0.938023	0.152111
Aldh3a2	0.958527	0.0426778
Rac1	0.994666	0.0852706
Slc25a4	0.995957	0.108707
Gpd2	1.00919	0.0419109
Atad1	0.906264	0.126742
Sars	1.25141	0.0808262
Dars	1.03607	0.0546886
Scp2	1.07871	0.0305944
Src	0.912935	0.0346621
S100a4	0.988442	0.00482945
Gls	0.906761	0.107927
Amacr	1.04588	0.0712765
Slc35a2	1.20672	0.0448743
Cpt1a	0.959525	0.0847724
Agps	0.833499	0.157137
Abcb7	1.07755	0.0560899
Ano6	1.08146	0.0492113
Iars2	0.808061	0.152111
Slc25a22	1.09901	0.0362819
Gnaq	1.18575	0.0320455
Erbb2ip; Erbin	0.793129	0.190147
Lnp; Lnpk	1.09975	0.0501793
Ergic3	0.956671	0.0836679
Vps26a	1.1241	0.0489311
Ssr1	1.20252	0.163837
Steap3	1.18448	0.0359414
Rab5b	0.967204	0.125501
43895	1.17951	0.0530382
Acsl1	1.1028	0.00423327
COX2	1.02787	0.0762551
Sec23a	0.217568	0.770233
Acot7	0.91103	0.129794
Trim28	0.960535	0.0176723
Eef1d	0.935609	0.0146894
Lmf1	0.598797	0.390451
Ap2a2	0.94282	0.105082
Mgat2	0.921765	0.0696542
Ctsd	0.962451	0.135609
Tmem214	0.672157	0.229318
Slc12a7	1.03048	0.0727236
Vps26b	0.966436	0.0971121
Slc38a1	1.13538	0.0289942
Stx12	0.947472	0.0425622
Tm2d2	1.2966	0.0484379
Marc2; Mosc2	1.14547	0.056131
Rab12	0.923133	0.0969693
Gabarapl2	0.359018	0.664564
Slc25a5	0.924114	0.0992765
LOC102631912	0.982035	0.00790048
Por	1.04983	0.0521564
Sco2	0.864363	0.144171
Serinc1	1.32587	0.131155
Psap	0.987936	0.0196025
Plxnb2	1.0426	0.0235525
Rab7	0.982895	0.0460477
Agpat1	0.896521	0.425498
Cct8	1.01636	0.0357104
Arf3	1.08879	0.0394222
Tln1	0.940874	0.0210348
Apob	0.596648	0.353264
Gstp2	0.460172	0.268933
Poglut1	0.770966	0.234657
Rhog	0.994731	0.0359075
Ptcd3	0.923455	0.107147
Tpp1	0.933535	0.0247211
Impad1	0.865432	0.034967
Nfs1	0.971991	0.0077157
Sfxn3	0.966624	0.0822132
Atp5k	1.09344	0.032879
Atp1b3	0.94794	0.114198
Copg; Copg1	1.06668	0.0739996
Igf1r	0.907684	0.0382163
Hsd17b11	0.971442	0.0664787
Sigmar1	0.941018	0.0324884
Plxna1	0.858518	0.0836197
Gnai2	0.993153	0.0738546
Rhot2	1.08024	0.0350732
Rab3gap2	1.08571	0.013658
Tpbg	1.02223	0.0403325
Arl6ip5	1.24048	0.0585866
Plec	1.1511	0.363173
Acsl3	1.00347	0.048687
Psmd8	1.07333	0.0375842
Slc25a13	0.86924	0.143244
Slc33a1	1.15541	0.0536477
Alg5	1.03083	0.0903593
Nup155	0.889376	0.0963865
Tmx2	1.21707	0.0382684
Rad23b	1.1656	0.0218656
Aacs	0.93841	0.00180912
Rdh13	0.864795	0.116673
Soat1	1.10272	0.0951006
Pcyox1l	1.18993	0.0726014
Bnip1	1.00072	0.000168677
Slc25a24	0.831851	0.124534
Echs1	0.770158	0.165199
BC017643	0.982171	0.0740921
Mfn1	0.945807	0.0782278
Atp1a1	0.998445	0.0666346
Rab11b	0.994054	0.117503
Rab1b	1.03509	0.00922024
Slc25a12	0.904736	0.0794454
Igsf8	0.977768	0.079238
Ddr2	1.15792	0.0272615
Rab9	1.1332	0.0171745
Nup50	0.773662	0.292823
Bcs1l	0.876996	0.130482
Mapre1	1.10481	0.0247462
Dcakd	0.855706	0.132591
Yif1b	1.11928	0.0751596
Sacm1l	1.02673	0.0417884
Sec63	0.959064	0.0511849
Got1	1.02308	0.0147864
Prdx5	0.921825	0.0966937
Ilvbl	0.960615	0.0458781
Ap1g1	-0.247154	0.879412
Csde1	1.10644	0.0213902
Spryd4	0.903159	0.0320803
Fam49b	1.09289	0.055225
Mia2	0.98742	0.0162416
Ehd2	1.03613	0.0136917
H6pd	0.946342	0.010269
Lpcat4	1.12904	0.102382
Dhrs1	1.05656	0.0302485
Xpo1	0.580685	0.509846
Pgrmc2	1.12596	0.0582197
C1galt1c1	0.836254	0.114236
Gcsh	0.95275	0.00601168
Rab31	0.932707	0.132021
5430435G22Rik; Rab7b	1.01577	0.00743616
Ppp2cb	1.00383	0.154298
Mospd2	0.868495	0.0762783
Kpna2	1.01922	0.02779
Nup160	1.15663	0.479517
Fndc3a	1.33901	0.23312
Ptgis	1.03852	0.0545529
Gls2	0.777747	0.098867
Mut	0.89476	0.107849
Clpp	1.05618	0.0123027
Pdgfra	1.12405	0.0479749
Il6st	0.964038	0.0365828
Cmpk1	1.52841	0.133291
Vkorc1	1.14572	0.17362
Rap1a	0.901002	0.126316
Cct2	0.820419	0.0605934
0610007P14Rik; Erg28	0.867009	0.111386
Acadsb	0.888846	0.131163
Rps3	1.04618	0.0299937
Ctnnb1	1.1349	0.0275558
Eif4a1	1.19253	0.0537686
Cyb5r3	0.949396	0.0497957
Pgk1	1.10773	0.0729738
Ankle2	1.04641	0.124392
Coq4	1.20323	0.0415367
Pla2g4a	0.946702	0.036047
Flna	1.00281	0.0251398
Afg3l2	0.741608	0.155584
S100a6	1.3609	0.0969889
Fdps	1.05761	0.0143831
Nras	0.885429	0.0511198
Scpep1	1.17441	0.0553064
Rps4x	0.934855	0.084213
Bzw1	1.13249	0.0396423
Atp1b1	0.923538	0.0336965
Ywhae	1.25742	0.0896776
Rab33b	0.997873	0.104416
Pfn1	1.03617	0.0689846
Tpm3	0.886105	0.0558287
Atp2b1	1.0928	0.0267819
Atp5o; LOC100047429; LOC102641678	0.825164	0.123075
Epha2	0.882974	0.135317
Ddx39	0.967851	0.0790064
Irgm1	0.650195	0.466549
Rab5c	1.00644	0.0964561
Cpd	1.07123	0.0137285
Rab1; Rab1a	1.09948	0.0462088
Atp6v1c1	0.927048	0.0548776
Agk	0.79941	0.179801
Dgat1	1.07946	0.0643754
Asph	0.809863	0.0554006
Psmd3	0.960195	0.0974082
Lamtor3; Gm5900	0.850997	0.0498834
Ndufs1	0.921339	0.0107677
Fam162a	0.966755	0.00520842
Abhd1	1.00903	0.0722546
Hint2	0.893333	0.0842567
Cd9	1.31989	0.123803
Capzb	0.874281	0.26163
Ivd	0.975889	0.0434171
Armc1	1.16286	0.0456544
Hmgcr	0.912475	0.0730127
Slc25a10; 0610009L18Rik	0.922826	0.147687
Lman2	1.01838	0.0634484
44076	1.05719	0.146077
Mrps2	0.680842	0.188857
Gcn1l1	0.0811364	0.936456
Acad9	0.933751	0.0354412
Pcmt1	0.95045	0.0191631
Acaa2	0.792512	0.0488069
Sucla2	0.973437	0.0598744
Parl	1.03352	0.0305602
Hsd17b4	0.845644	0.135512
Gnas	0.974175	0.0697101
Faf2	1.02487	0.0598444
Vps35	0.949612	0.0334214
Gdpd1	0.950183	0.089429
Ndufa9	0.768231	0.187789
Acox3	0.923598	0.140667
Sdhd	0.826576	0.0505662
Sfxn1	1.00198	0.0219196
Mrpl23; Mrpl23-ps1	0.670992	0.274455
Fen1	0.378914	0.704982
Ptgr1	0.950918	0.010272
Crabp1	1.04539	0.0443169
Rheb	1.00488	0.0258038
Agpat3	1.00715	0.0420558
Mybbp1a	0.0178912	0.9896
Xpnpep1	1.01407	0.0155692
Rras	0.877542	0.111848
Hnrnph1	0.997424	0.0413925
Rragc	0.370177	0.754234
Ptpra	0.670015	0.311247
Hsd17b7	0.919761	0.148635
Acta1	1.18257	0.0749111
Bzw2	0.970894	0.0324472
Acadvl	0.928498	0.0511102
Ptbp1	0.874675	0.0103528
Npepps	1.08234	0.10491
Gsto1	0.893232	0.0083917
Mpp1	0.518619	0.448214
Rala	0.867293	0.124168
Pef1	0.866026	0.026344
Cd109	0.926582	0.0736537
Tceb1; Eloc; LOC101056616; LOC102642819	0.861426	0.294124
Cldn25; Cldnd1	1.09326	0.105027
Rpl7	0.809868	0.049081
Glt8d1	0.884823	0.0150971
Atp6ap1	0.798855	0.212952
Ndufaf1	1.0567	0.0391769
Srd5a3	0.661835	0.292648
Psmb5	0.845338	0.0743702
Atp11c	1.01128	0.0614224
Ufsp2	1.06919	0.0350757
Pds5a	0.624446	0.284362
Nipsnap3b	0.751795	0.156362
Ywhah	1.03108	0.0171095
Eif5a	0.899747	0.00702154
Rab32	0.982475	0.104626
Prdx4	0.734825	0.0882848
Mdh2	0.825397	0.0734351
Acads	0.87818	0.0805576
Serpinf1	0.943275	0.0112119
Ctps	0.961197	0.0760622
Gnb2	0.953187	0.0320989
Ndufb11	0.942059	0.110888
Sf1	0.754507	0.237659
Bcat2	0.825769	0.0584519
Prpf19	1.08192	0.0216845
Mogs	0.866395	0.070772
Spcs2	0.925006	0.0646981
Eif2s3x	1.10475	0.0363441
Acsl5	0.863486	0.0551309
Eprs	0.264338	0.819836
Fkbp10	0.727934	0.0754918
Ergic1	0.82462	0.114012
Zfpl1	0.853578	0.023171
Ssr3	0.8788	0.0599127
Isoc2a	0.840095	0.0436429
Gnpat	0.967799	0.0651817
Ptgs1	0.900121	0.0709615
Megf8	0.945103	0.0275658
Myh9	0.444291	0.791871
Pdhb	0.899507	0.0633742
Hsd17b10	0.940531	0.0891825
Acbd3	1.00396	0.0269186
Rps27a; Rps27a-ps2; LOC100042019	0.989468	0.132506
Rpl5	1.00207	0.0529345
Csnk2a1	0.729926	0.188838
Anxa6	0.945501	0.0150525
Rps6-ps4; Rps6; LOC105244208	0.858141	0.107761
Hnrnpm	0.826683	0.162439
Steap2	0.595778	0.230973
Ptpn1	0.930898	0.158049
Psmd14	0.833033	0.158558
Rps15a	1.16503	0.0684363
Man1a2	0.795793	0.165502
Rras2	1.00233	0.0555617
Ndufs2	0.935101	0.126348
Stx4a	1.04519	0.0291263
Phgdh	1.03359	0.0307449
Timm50	0.898023	0.103779
Slc25a1	0.834762	0.0805937
Api5	1.03018	0.0185111
Apoo	0.784433	0.130155
Tceb2; Elob	0.897979	0.000782897
Prkacb	0.912817	0.0741734
Napa	1.04352	0.0366288
Rap2b	1.06411	0.042584
Osbp	0.929668	0.0414261
Erp29	0.713753	0.102514
Lrpprc	0.769253	0.161518
Decr1	0.789111	0.247371
Pycr2	0.884352	0.0482354
Atl3	0.961639	0.0395526
Tollip	0.741561	0.244603
Snx3	0.85353	0.0334436
Gnao1	0.998815	0.0892308
Crat	0.789615	0.132233
Rpn2	0.888353	0.0701278
Acsl4	1.01035	0.0552047
Bub3	0.454354	0.568144
Nnt	0.965192	0.0481281
Ndufs3	0.725629	0.219976
Pi4k2a	0.7597	0.15508
Rpl13a	0.988799	0.0533153
Rps2; Rps2-ps13	0.865326	0.0474504
Acot9	0.795386	0.157315
Mrps27	0.889926	0.0645436
Acox1	0.941343	0.0992216
Naalad2	0.9998	0.0136896
Fdxr	0.853732	0.0138895
Hsp90b1	0.963058	0.009687
Mthfd1l	0.858342	0.0614755
Ap2b1	0.846647	0.108704
Pigx	0.830253	0.0100988
Mrpl4	0.73029	0.175856
Rhoa	0.865758	0.151213
Ap2m1	0.876176	0.0994458
Nsf	0.829165	0.136296
Inf2	0.925389	0.0839475
Clpx	0.863779	0.00950237
Celf1	0.721906	0.237452
Vdac3	1.17932	0.0650109
Shmt2	0.833541	0.0658106
Dnaja1	0.945071	0.0291373
Txnip	1.04275	0.0373053
Efemp1	0.8825	0.0947815
Aup1	1.03725	0.0596139
Actn4	1.03585	0.120314
Sdhb	0.828637	0.0488431
Man1a	0.639857	0.268022
Psma5	0.961961	0.0385805
Psmd2	0.858862	0.0533374
Glb1	0.745889	0.260843
Ganab	0.841873	0.0319187
Tmem55b	0.825332	0.0302923
Mrpl37	0.863789	0.130658
Tmem55a	1.15201	0.0578948
Rab18	0.952561	0.110829
Lars	1.71478	0.186882
Ero1l	0.745571	0.184753
Rab4b	0.975311	0.0316808
Atic	0.931323	0.00405988
Eif1	0.75259	0.0751215
Mfge8	0.912592	0.0712876
Rab21	0.963494	0.0876254
Tor1b	0.642106	0.348362
Golm1	0.853488	0.00202188
Ufl1	1.04514	0.0302204
Smpd2	1.05358	0.0509155
Dhodh	0.899223	0.105779
Ly75	0.864454	0.0722296
Anxa7	0.975988	0.0282706
2510039O18Rik	0.835176	0.00934501
Crtap	0.829713	0.0756968
Tmlhe	0.896845	0.198333
Sqrdl; Sqor	0.782542	0.160276
Cyp20a1	0.923121	0.087959
Sec11a	1.00313	0.0843353
Atp6ap2	0.987806	0.0835035
Psmb4	0.932239	0.0368494
Nedd4	0.831303	0.0866357
Cyb5r1	0.899111	0.0765387
Cox6c	0.997782	0.044961
Pafah2	0.867523	0.0982351
Lnpep	0.985559	0.02891
Trnt1	0.969542	0.035716
Ywhaz	1.24071	0.132186
Tbrg4	0.748493	0.26952
Stx8	0.840401	0.0314942
Kars	0.687585	0.0655411
Ndufv1	0.676373	0.137757
Ogdh	0.958823	0.0283635
Eef1b2	0.930668	0.00697304
Sgpl1	0.368893	0.760924
Adam10	0.736536	0.117231
Dhrs7	0.948127	0.0437146
Ptges2	0.988143	0.123801
Snrpb	0.398985	0.477486
Cyc1	0.739428	0.135236
Etf1	0.94191	0.134207
Nap1l1	0.925341	0.00639203
Cox4i1	0.889964	0.116717
5033414D02Rik; Plgrkt	0.777006	0.123264
Vars	0.873136	0.0662195
P4ha2	0.894704	0.00646981
3110001D03Rik; Tmem261; Dmac1	0.999049	0.0827985
Tcp1	0.845554	0.144764
Tmem11	0.63932	0.31183
Rhoc	0.753973	0.104312
Eci2	1.02695	0.0375362
Dtymk	0.890972	0.13823
Rpl19; Rpl19-ps11	1.00027	0.0477883
Dnpep	0.792314	0.0480592
Ociad1	0.912613	0.0386784
Epb4.1l3; Epb41l3	0.910433	0.0536949
Uqcr10	0.673334	0.229554
Pdcd6ip	0.984452	0.0319813
Axl	0.997149	0.0363016
Sdha	0.933158	0.029462
Tapbp	0.797458	0.0156017
Phb	0.861301	0.0804076
Prl2c2	0.70819	0.0824706
Uqcrc2	0.747176	0.111876
Idh1	0.810997	0.066833
Ptp4a2	0.674857	0.227424
Ncam1	0.926237	0.039775
Galnt2	0.876908	0.187317
Hnrnpl	0.851064	0.0871823
Aars	0.911374	0.129821
Ethe1	0.69624	0.146913
G6pdx	0.770318	0.153364
Scd1	0.896089	0.0596468
Etfdh	0.807463	0.0718163
Trap1	0.817312	0.0876403
Lrrc59	0.688748	0.132018
Ehd1	0.980423	0.0396286
Cap1	0.89613	0.0144037
Anxa5	0.917048	0.0160178
Sec62	0.717875	0.0531659
Eif3e	1.0041	0.0494096
Apoa1bp; Naxe	0.986517	0.0427263
Hars	0.866467	0.154311
Il1rap	0.813543	0.10349
Epb4.1l2; Epb41l2	0.937195	0.0275072
Etfa	0.803589	0.0722034
Mrps10	0.511493	0.484745
Cnn2	0.908793	0.0102718
B3gnt1; B4gat1	0.939144	0.0647741
Ube2j1	0.84236	0.144973
Arl8a	0.815278	0.125771
Dpm1	0.790523	0.131319
2810407C02Rik; Selt; Selenot	0.685628	0.309568
Tmem43	1.03032	0.0401269
Hnrnpll; Hnrpll	0.968554	0.0782986
Man2a1	0.974498	0.025436
Gng12	0.827306	0.000745074
Pam16	0.569484	0.171086
Pgrmc1	0.852077	0.0454171
Copa	0.910186	0.143961
Pofut2	0.751698	0.0549452
Pmpca	0.904392	0.0598154
Mtap	0.879504	0.0399392
Mmp2	0.880096	0.0717267
Vwa8	0.915661	0.0350293
Rps23	0.647551	0.325809
Ilf2	0.88013	0.320104
Htra2	0.824401	0.103804
Ptgs2	0.766649	0.13923
Dpysl3	0.702632	0.0576105
Cyp2j6	0.923362	0.0198263
P4ha1	0.774463	0.0126801
Rps8; Gm15501	0.930486	0.097809
Dynll2	0.827804	0.0448475
Ddah2	0.709397	0.20329
Kdelc1	0.687918	0.116897
Tmem177	0.754517	0.0255292
Ndufs8	0.691469	0.309868
Pgp	0.872015	0.00692477
Cstf2	0.684302	0.053076
Pdlim5	0.872346	0.105763
Anxa2	0.917411	0.0245863
Hadha	0.703112	0.21265
Ndfip2	0.690982	0.328083
Ralb	0.745933	0.17314
Cpt2	0.888744	0.0370126
Tuba1b	1.22026	0.10084
Tomm70a	0.833883	0.114281
Paics	0.733768	0.298043
Oat	0.782328	0.0677443
Nucb1	0.498535	0.245649
Erp44	0.660168	0.0947362
Tgfbr3	0.834189	0.0261893
Rab43	0.776378	0.406801
Mgat1	0.889602	0.0426058
Rrbp1	0.595241	0.204802
Pck2	0.891441	0.075649
Erlin2	0.835132	0.0311581
Rps5	0.800389	0.0966301
Lap3	0.782989	0.0923129
Dstn	0.924031	0.0695494
Lbr	0.795976	0.163786
Emc1	0.780383	0.0547498
Psat1	0.888355	0.0243611
Hsph1	0.863138	0.0282808
St3gal1	1.06535	0.0798817
Agpat6; Gpat4	0.665095	0.286136
Ndufa10	0.833816	0.0263263
Brd4	0.722462	0.0123172
Itpr3	0.566905	0.586891
Txn1	0.749332	0.00682906
Sel1l	0.843151	0.037351
Sec61a1	0.981456	0.0586296
Rpl9	0.895105	0.147447
Sars2	0.0973873	0.90151
Mrpl28	0.705268	0.160348
Fh1	0.809424	0.016021
Idh2	0.821006	0.11844
Frrs1	0.338459	0.749359
Mgrn1	0.832762	0.0226813
Acadl	0.866678	0.05649
Ddost	0.812858	0.114325
Tubb4b	1.04546	0.149903
Jagn1	1.08268	0.165517
Mpc2	0.706516	0.280759
Mmgt1	0.94058	0.0680595
Kras	0.636385	0.382198
Capns1	0.801763	0.0230026
Acaa1a	0.744333	0.0260631
Pgam1	1.03777	0.169215
Vcp	0.964451	0.124864
Ruvbl1	0.89819	0.0614694
Gpt2	0.924977	0.0401382
Flot1	0.895184	0.10023
Nup93	0.850115	0.0249311
Comtd1	0.672785	0.277187
Lta4h	1.3601	0.242857
Uqcrc1	0.801675	0.0618993
Akr1a1	1.03315	0.210925
Pabpn1	0.472266	0.361737
Ldhb	1.06811	0.113901
Plod1	0.77846	0.0280946
Tram1	1.15749	0.127178
Atp5f1	0.754534	0.0692403
Rpl18	0.633707	0.0763186
Poldip2	0.685716	0.180172
Ahcy; Gm4737	1.01093	0.102879
Cspg4	0.709826	0.0093727
Nomo1	0.813325	0.0378954
Yars	0.974654	0.0399288
Tardbp	0.792925	0.0886492
Suclg1	0.64304	0.173398
Vcl	1.00627	0.0518432
Suclg2	0.76899	0.0982944
Pet112; Pet112l; Gatb	1.20322	0.14234
Fubp1	0.706266	0.00830171
Mrpl24	0.495818	0.34991
Gde1	1.03116	0.118854
Cct6a	0.816408	0.0959727
Arhgdia	0.802065	0.0694465
Vcam1	0.848999	0.0330231
Emc3	0.826413	0.0727104
Grb10	0.88029	0.0459798
Mgst3	1.20432	0.148151
Ppib	0.706855	0.231498
Myof	0.829463	0.0804249
Adam9	0.493466	0.297333
Cox5a	0.669323	0.189236
Magt1	0.865454	0.0407125
Atp5a1	0.77692	0.11888
Plod3	0.656547	0.141981
Tomm40	1.05599	0.0724482
Timm44	0.826966	0.165504
Mcm3	0.80684	0.122471
Aldh1l2	0.89331	0.0278218
Anxa1	0.71361	0.0318794
Lgals3	0.674629	0.083679
Cept1	0.585531	0.318
Rab34	0.96773	0.11341
Psma3	1.00219	0.0660629
Rps12	0.661707	0.0263875
Tmed3	0.795733	0.126852
Prdx1	0.830514	0.0376843
Ptges3; Gm9769; Ptges3-ps; LOC100048119; LOC102641464	0.933249	0.0809793
Ddx6	0.776265	0.174634
Hadh	0.672007	0.117649
Myl6	0.975075	0.106644
Mtx1	0.810092	0.0248441
Khsrp	0.706019	0.00782072
Cant1	0.629244	0.234569
Lox	0.665614	0.0176896
Pmpcb	0.798419	0.0909442
Uggt1	0.741921	0.0219339
Glt25d1; Colgalt1	0.769123	0.0546207
Rpl7a	0.932435	0.0925724
Atp5h	0.689373	0.0662081
Lrp1	0.731607	0.0295258
Slc27a4	0.735986	0.114298
Eef2	0.992134	0.0614185
Rnh1	0.783513	0.0311602
Dnajc1	0.795868	0.102679
Ext2	0.39351	0.262159
Col1a1	0.889219	0.0521132
Mccc2	0.524648	0.202307
Sumf1	0.43721	0.505826
Fasn	0.812581	0.206622
Pcna	0.802614	0.0787055
Pdzd8	0.740257	0.10856
Got2	0.688134	0.0782251
Idi1; LOC102635781; Gm38481	0.74581	0.0889661
Cbx3	0.605188	0.0497662
Maoa	0.74128	0.13384
Mbnl2	0.836439	0.0263941
Mrpl53	0.780689	0.0244966
Ddb1	0.896594	0.0966659
Gla	0.723419	0.0914764
Xrn2	0.658361	0.123575
44085	1.0042	0.0902515
Ppa2	0.554241	0.147518
Glud1	0.73922	0.0925838
Opa1	0.841703	0.0298568
Ssbp1	0.724015	0.0863674
Igf2r	0.725928	0.000178898
Hspa8	0.821821	0.0435646
Acsf2	0.834115	0.0293129
Acat1	0.622281	0.097372
Eps8	0.750006	0.00252296
Mrps30	0.748313	0.143316
Prdx2	0.96397	0.106101
Arpc1b	0.877024	0.0927781
Hsdl2	0.84762	0.0404022
Psmb6	0.825052	0.0500931
Hibch	0.623388	0.130196
Tor1a	0.491239	0.280246
Copb2	0.68949	0.18082
Pus1	0.705874	0.00947005
Snd1	0.907639	0.0437644
Atp5c1	0.616495	0.15116
Xdh	0.933406	0.154203
Usp9x	0.836017	0.049923
Itga6	0.847445	0.0237834
Acadm	0.735883	0.0639772
Hspa1a; Hspa1b	0.739588	0.654703
Npm1	0.771167	0.0123644
Aimp1	0.396463	0.51167
Mxra8	0.538645	0.384856
Ndufb3	0.604043	0.182165
Ccdc109a; Mcu	0.878187	0.0954589
Mdh1	0.919514	0.114624
Anxa11	0.782782	0.0156532
Txnrd1	1.46332	0.236118
Tufm	0.88217	0.0556882
Sec22b	0.896283	0.0485236
Gfm1	0.668493	0.136447
Stxbp1	0.742512	0.0720327
Man1b1	0.7215	0.276006
Aifm1	0.774206	0.0749242
Cct7	0.922744	0.0644295
Aco2	0.719525	0.0974531
Rps25	0.753215	0.0902859
Ndufb9	0.590895	0.398307
Napg	0.457356	0.433948
St13	0.69239	0.00414678
Timm8a1	0.167813	0.798254
Fastkd5	0.9114	0.219051
Psmd6	0.943186	0.065675
Rab35	0.855867	0.0318641
Ide	1.12344	0.21286
Hadhb	0.705968	0.18544
Vapa	0.734776	0.108676
Glrx5	0.57883	0.0554942
Hccs	0.884457	0.115221
Arhgdib	0.775993	0.0130591
Hnrnpf	0.665967	0.0691191
Cttn	0.870914	0.0735793
Itfg3; Fam234a	1.01452	0.164603
Mrps17	0.476746	0.310895
Cltc	0.883567	0.253157
Ufd1l; Ufd1	0.803461	0.282152
Phb2	0.693706	0.15252
Fstl1	0.582209	0.143166
Tfrc	0.782912	0.0907884
Ranbp1	0.81557	0.019956
Pdlim1	0.701408	0.00277387
Pccb	0.544587	0.267927
Mrpl44	0.633872	0.111883
LOC100045999; Ran; LOC102641332	0.887772	0.0572192
Atp5b	0.617482	0.162799
Mrpl13	0.688355	0.192131
Aldh9a1	0.802256	0.114818
H2-Ke6	0.638743	0.156788
Serpinh1	0.724734	0.0313506
Hars2	0.735826	0.0175539
Msn	0.866672	0.0659957
KRT5	0.352473	0.836875
Eif4g1	0.930886	0.0965534
Mgst1	1.02189	0.113435
Supv3l1	0.90862	0.0771257
Mrpl3	0.541455	0.27706
Samm50	0.645921	0.238405
Dlst	0.583258	0.156734
Cdk1	0.719765	0.136677
Psmd13	0.833096	0.0743792
Grpel1	0.539061	0.114873
Dhrs13	0.750835	0.389614
Ctsb	0.630432	0.118205
Dag1	0.646242	0.0491924
Synj2bp; Gm20498; Synj2bp-cox16	1.06283	0.119822
Psmc1	0.783396	0.069511
Mmp14	0.774518	0.0608208
Mrpl39	0.696616	0.147933
Rpl26; Gm15772	0.906293	0.0785143
Abce1	0.961112	0.188448
Atp13a3	0.673311	0.0176625
Esyt1	0.601668	0.0358638
Actb	0.988039	0.122735
Dnajc10	0.719126	0.0135771
Galnt7	0.460462	0.284921
Srpr	0.562525	0.265432
Mcm7	0.615738	0.254576
Prdx3	0.466581	0.207708
Mrpl15	0.729763	0.189498
Rpl14	0.824837	0.128892
Jup	0.608093	0.789081
Nedd4l	0.64488	0.0296903
Nexn	0.703216	0.00795237
Oxct1	0.590978	0.213766
Ube2g2	0.655421	0.358599
Idh3a	0.688391	0.176275
Gaa	0.666058	0.102806
Slc2a1	0.46063	0.63111
Tkt	0.847698	0.0970616
Aldh2	0.695048	0.128553
Psmc4	0.831762	0.0971759
Farsb	0.773702	0.0353373
Eno1; Gm5506; Eno1b	0.78812	0.093057
Nadk2; Nadkd1	0.836238	0.0931871
Gspt1	0.907357	0.0989655
Scfd1	0.587805	0.259106
Gba	0.730224	0.0952688
Thbs1	0.737765	0.0402069
Mcat	0.785818	0.183319
Itgb1	0.649035	0.0527877
Serpinb6a	0.929343	0.10252
Rpl32; Rpl32p	0.586926	0.120137
Psma6	0.889014	0.0639367
Hspd1	0.603523	0.0487418
Tpt1	0.881906	0.112316
Rdx	0.626827	0.00471907
Nln	0.62754	0.288595
Dpp7	0.834471	0.16137
Cat	0.524637	0.151451
Taco1	0.617815	0.222096
Grsf1	0.672387	0.272657
Mrpl10	0.564685	0.173732
Ndufb10	0.606237	0.0373004
Pcbp2	0.912081	0.0796245
Eif5; LOC100047658; LOC102641436	0.794423	0.186932
Hnrnpd	0.537904	0.162363
Ndufb5	0.593838	0.0961286
C1qbp	0.580235	0.0832229
Pabpc1	0.786445	0.0314541
Tmem65	0.799166	0.101806
Ugdh	0.772723	0.0889944
Slc12a4	0.902681	0.0730635
Nudt9	0.529472	0.458691
Atp5j2	0.592654	0.2629
Hk1	0.866525	0.0694002
Bckdha	0.744796	0.065023
Ndufab1	0.557174	0.0342805
Psme3	0.722233	0.116208
Cd44	0.574505	0.0475784
Tubb5	0.92262	0.0813393
Acot2	0.740945	0.0752834
Mpp6	0.960639	0.190132
Ppia	0.741391	0.135404
Mrpl21	0.435	0.451778
Hibadh	0.636387	0.0590348
Rpl17	0.691146	0.133157
Ctnnd1	0.0580412	0.956584
Canx	0.686865	0.0540932
Hspa9	0.606389	0.0773163
9430016H08Rik; Maip1	0.702209	0.345403
Mrpl46	0.325157	0.515153
Pcbp1	0.860487	0.0649854
Gars	0.864993	0.0705254
Tor1aip2	0.731085	0.0228989
Pisd	0.628411	0.12924
Lamtor2	0.602465	0.295602
Actr2	0.805717	0.243338
F3	0.932532	0.204412
Dnajc3	0.522702	0.106042
Map1lc3b	0.689877	0.0576124
Cdc123	0.479133	0.202735
Acp6	0.692025	0.0825871
Rps16-ps2; Rps16	0.79709	0.0850572
Tars	0.742972	0.182078
Txnl1	1.01561	0.174384
Rpl30; Rpl30-ps8; Gm12191	0.587732	0.334409
Cs	0.678504	0.151001
Sod2	0.510929	0.18473
Txndc5	0.492206	0.118229
Mrps28	0.43482	0.25821
Cfl1	0.726687	0.0622358
Cisd2	0.547374	0.466113
Lonp1	0.699579	0.0345071
Mrpl14	0.55686	0.0566875
KRT6A	0.299942	0.937113
Dnaja3	0.762765	0.0365966
Ddx3y	-0.284573	0.8779
Tmpo	0.823879	0.274129
Psmd12	0.738216	0.143432
Lepre1; P3h1	0.651027	0.00500063
Ccdc47	0.720799	0.134172
Yars2	0.629941	0.140594
Pdia6	0.573801	0.204054
Rpl36	0.72396	0.308859
Mif	0.586888	0.0129821
Bgn	0.552026	0.103357
Nars	0.830996	0.125469
Stom	0.768312	0.0985153
Uqcrfs1	0.550631	0.147056
Itga5	0.573278	0.0827858
Anxa3	0.630367	0.00661443
Fam129b	0.755463	0.0807442
Tpi1	0.75774	0.212325
Snrpa1	0.484657	0.0864053
Ap1b1	0.68202	0.0916259
Mocs1	0.369612	0.616496
Mrps11	0.549474	0.0506525
Esd	0.761665	0.0672673
Gnb1	0.700017	0.0208322
Nmt1	0.737739	0.033866
Hnrnpa2b1	0.79977	0.0598617
Rpl27a	0.824339	0.0788222
Thbs2	0.466854	0.416158
Capza1	0.610579	0.00165935
Chmp6	0.47624	0.587702
Atp5e	0.539094	0.0680891
Ndufv2	0.610529	0.0854319
Gns	0.654132	0.0112499
Etfb	0.441671	0.251931
Mrpl19	0.584998	0.155649
Emc8	0.70072	0.0715871
Cct4	0.790027	0.121643
Dld	0.563248	0.0450043
D10Wsu52e; Rtcb	0.649545	0.0400959
Arhgap23	0.927959	0.142654
Prep	0.750779	0.167489
Hdhd3	0.641439	0.0092116
Disc1	1.03636	0.203123
Cox5b	0.544571	0.029679
Ndufa5	0.537919	0.102123
Arcn1	0.63134	0.0386896
Tmed5	0.659427	0.197823
Psma4	0.722998	0.0549579
Hnrnpa1	0.687022	0.0472879
Ikbkap	0.0650531	0.916689
H2-D1	0.714172	0.161932
Hspe1	0.579425	0.114773
Fkbp3	0.604643	0.0270346
Acot13	0.478183	0.145135
Hnrnpab	0.226783	0.647515
Rab22a	0.810007	0.0781867
Mrps35	0.538936	0.110045
D17Wsu104e; Mydgf	0.560411	0.324893
Atp6v1b2	0.551319	0.296513
D10Jhu81e; LOC100046684; LOC102641949	0.658124	0.0963642
Rps14	0.630359	0.165441
Hacl1	0.686466	0.197663
Lamtor1	0.716278	0.108326
Vim	0.406538	0.267637
Cycs; Gm10053	0.219893	0.59877
Picalm	0.690416	0.0955434
Hyou1	0.577967	0.0514536
Dnaja2	0.53972	0.24515
Erlec1	0.479399	0.151611
Mrps5	0.51775	0.116295
Emc2	0.686616	0.0596139
44081	0.737888	0.136278
Rbbp4	0.559913	0.174974
Rpl23; LOC100044627; LOC100862455	0.59871	0.377226
Ctsl	0.509962	0.352725
Caprin1	-0.0752667	0.924176
Pdha1	0.527826	0.173159
Pkm	0.807241	0.0900095
Pacsin2	0.0956429	0.860888
Dap3	0.66325	0.0642696
Mrpl55	0.159316	0.75582
Golph3	0.422221	0.389318
Ncl	0.482091	0.0190218
Rpl10; Rpl10-ps1	0.760577	0.207693
Cct5	0.795774	0.102288
Aldh5a1	0.683267	0.212943
Il1rl1	0.250804	0.737156
Ak2	0.579609	0.13016
Gm3244; Ndufb4; Gm3873	0.71196	0.15975
Atp6v1a	0.68557	0.179018
Rpl13	0.772628	0.12382
Mrpl11	0.397086	0.271576
Psmd1	0.64615	0.17082
Mta2	0.163688	0.880106
Psma7	0.750727	0.0731972
Mesdc2; Mesd	0.566195	0.0268701
Lman1	0.517151	0.0193002
Pdhx	0.377487	0.449528
Iqgap1	0.726517	0.250457
Mrpl12	0.390629	0.200291
Mrpl43	0.306722	0.335209
Glipr2	0.656465	0.136097
Akr1b3	0.52522	0.0830939
Fam63a; Mindy1	0.921721	0.318558
Arpc5	0.751218	0.232027
Mecr	0.467969	0.599199
Aldh18a1	0.695284	0.0792417
Mrpl9	0.459601	0.339685
Dlat	0.562142	0.0389639
Psmb7	0.58662	0.122894
Hspa4	0.715296	0.0955449
Hcfc1	0.7362	0.246504
Dnajb11	0.584794	0.184179
Ldlr	0.363566	0.727661
Nov	0.99494	0.208367
Gnb2l1; Rack1	0.815854	0.132797
Rbm39	0.712598	0.23478
Cops8	0.509522	0.011696
Hspa5	0.574367	0.074247
Ptgfrn	0.603071	0.207606
Mrps22	0.409194	0.175839
Immt	0.69959	0.0836678
BC003331	0.707359	0.210866
AI481877	0.470376	0.0925557
Rps7	0.553888	0.0682434
Hnrnpul1	0.78689	0.154197
Acly	0.858098	0.155389
Eral1	0.5293	0.0298909
Tom1	0.608783	0.343537
Asah1	0.504366	0.362962
Cct3	0.692957	0.192526
Rps26; Rps26-ps1	0.396633	0.253867
Rpsa; LOC100045332; LOC100505031; LOC102642689	1.02985	0.194747
44083	0.711488	0.123393
Itgav	0.503835	0.065301
Rps17	0.701653	0.141662
Rps11	0.769189	0.150494
Idh3g	0.552524	0.237501
Fkbp9	0.285141	0.39811
Ap3d1	0.968968	0.182536
Ddx5	0.652909	0.180269
Gusb	0.36658	0.177037
Rpl4	0.724557	0.17689
Apool	0.65323	0.162
Rps13; Rps13-ps1; LOC102642137	0.495502	0.162823
Fscn1	0.900191	0.225071
Camk2d	0.637348	0.438495
Ptrh1	0.293908	0.419523
Uchl5	0.652751	0.0843365
Pa2g4	0.521184	0.304224
Ckap4	0.425083	0.0273833
Gsr	0.505673	0.12088
Fkbp11	0.285519	0.536039
Tcea1	0.408049	0.604987
Mrpl20	0.31829	0.534285
Hmgcl	0.653079	0.162215
Ak3	0.525704	0.251969
Eef1a1; LOC101056619	0.686294	0.116725
Rps24; LOC677113; LOC102642752	0.718434	0.248018
Thbd	0.553653	0.181972
Slit2	0.611385	0.123229
Ict1; Mrpl58	0.158935	0.684203
Stip1	0.451279	0.00256287
Rps9	0.762255	0.149317
P4hb	0.648916	0.0894636
Cpox	0.582669	0.0664236
Psma1	0.572732	0.105137
Hnrnpu	0.48792	0.174385
Strap	0.460788	0.397084
Vps29	0.650145	0.102693
Abcf2	0.624196	0.207809
Ftl1	0.351081	0.205896
Pdia4	0.290064	0.414816
Xpnpep3	0.783269	0.236154
Atp5d	0.422511	0.119026
Mthfd2	0.259864	0.425143
Mrps9	0.533144	0.0911108
Txndc12	0.129649	0.770967
Fkbp2	0.0102294	0.983311
Fbln2	0.605724	0.146682
Actn1	0.79973	0.200465
Nme2	0.54562	0.308612
Lamc1	0.336269	0.143554
Snx9	0.552247	0.421472
Rpl34-ps1; Rpl34; Gm4705	0.493891	0.0852687
G3bp1	0.383397	0.488384
Mat2a	0.488904	0.106897
Ssb	0.547834	0.118026
Uqcrq	0.352082	0.369528
Lamp1	0.659365	0.132911
Pdia3	0.420124	0.116993
Pafah1b1	0.442717	0.213049
Ikbip	0.403165	0.190722
Mrpl47	0.275164	0.577963
Cyb5; Cyb5a	0.31424	0.368994
Mrpl27; Gm6304	0.369711	0.34362
Mia3	0.389316	0.103474
Hspa13	0.429065	0.214336
Golga5	0.490945	0.108581
Rpl27; LOC108167922	0.6594	0.159615
KRT14	-0.251193	0.908118
Hnrnpk	0.56944	0.14251
Ikbip	0.380679	0.00196757
Tial1	0.354553	0.615827
Fads2	0.527787	0.462188
Ctsz	0.414409	0.371957
Tmed9	0.291159	0.360682
Mrpl38	0.557638	0.175677
Lrp1b	0.663321	0.275666
Sdcbp	0.430527	0.386408
Hmgb1; Gm21596; LOC100862258	0.380371	0.0968468
Pcca	0.384485	0.136061
Snrpd1	0.44719	0.306759
Dlg1	0.527375	0.198353
Mapk15	0.465801	0.524659
Rpl10a	0.750577	0.219484
Clta	0.379071	0.11967
Hnrnpa3	0.521153	0.228083
Rps18	0.466053	0.149308
Mrpl2	0.459633	0.322415
Timp1	0.48756	0.293869
Calr	0.491236	0.178062
Ubxn4	0.549455	0.113017
Psmb1	0.969439	0.310562
Mrpl22	0.0945877	0.825155
H3f3a; H3f3b	0.690632	0.783833
Rpl22; LOC100047372; LOC100504863; LOC102642602	0.659324	0.281549
Aldh7a1	0.661838	0.191795
Mrps15	0.312503	0.391593
Mccc1	0.399484	0.034302
Ppif	0.0569781	0.91353
Rps3a; Rps3a1	0.47654	0.208889
Mrps16	0.216543	0.700895
Lamb1	0.364991	0.0887656
F5	0.599695	0.185393
Rpn1	0.512426	0.350641
Pcx	0.382896	0.030502
Dsp	0.885515	0.681678
Prkcsh	0.191601	0.317426
Cacybp	0.511967	0.197239
Marcks	0.16642	0.583928
B2m	0.0683651	0.881469
Clint1	0.515631	0.326182
Rexo2	0.251141	0.676371
ALB	0.373112	0.100352
Arpc3	0.769197	0.244334
Serbp1	0.15247	0.650841
Tbc1d8b	0.481256	0.120493
Mrps31	0.10399	0.708129
Impg1	0.321501	0.160572
Hgs	0.280656	0.00460555
Ewsr1	0.321923	0.109201
Syncrip	0.534376	0.155008
Rpl38; Rpl38-ps1; Rpl38-ps2	0.34204	0.44771
Col1a2	0.326517	0.0964381
Rpl23a	0.553591	0.207524
Mrpl45	0.358488	0.264637
Lmna	-0.164925	0.94515
Mrps21	0.067423	0.883014
Khdrbs1	0.467396	0.275053
Nucb2	0.270712	0.213715
Rps10	0.144634	0.645711
Stxbp3a; Stxbp3	-0.00791925	0.986311
Hist4h4; Hist1h4a; Hist1h4k; Hist1h4c; Hist1h4i; Hist1h4n; Hist1h4h; Hist1h4f; Hist1h4j; Hist1h4b; Hist1h4m; Hist1h4d; Hist2h4; LOC100862646; LOC102641229	0.333609	0.919119
Alcam	0.282821	0.120347
Dnajc11	0.583751	0.331588
Rcn3	0.220839	0.0718738
Gapdh; Gm20899; LOC100042025; Gapdh-ps15; Gm12033	0.703821	0.258453
Cisd1	0.450803	0.4815
Uqcrb	-0.0341284	0.945199
Tmem2	0.459223	0.344665
Macrod1	0.33222	0.227469
Rpl24	0.380053	0.412025
Tor1aip1	0.432339	0.470912
Ndufs5; BC002163; LOC100504968; LOC102641315	0.237183	0.262456
Glg1	0.294775	0.504718
Prdx6	0.486081	0.459385
Slc31a1	1.02164	0.146762
Snrpd2	0.21431	0.630757
Atp6v1e1	0.533505	0.27029
Rcn1	0.117698	0.592934
Fth1	0.330668	0.228893
KRT17	-0.175557	0.974087
Lgmn	0.316549	0.503465
Pitrm1	0.462235	0.347133
Ola1	0.0451355	0.945857
Mrps6	0.128939	0.692824
Lgals1	0.0882258	0.679403
Rpl39	0.4034	0.26456
Set	0.256874	0.601379
Pdp1	0.111483	0.670385
Pigs	0.265438	0.629179
Sparc	0.0199177	0.928637
Mrpl35	0.0689943	0.900023
Timm9	0.111587	0.41423
Mrps34	0.035437	0.822084
Gna13	0.281315	0.709969
F2	0.0895177	0.854251
Cox6b1	0.117734	0.823989
Hspa4l	0.371063	0.498708
Mrpl1	0.0491284	0.881202
Calu	0.01357	0.937987
Trmt10c	0.326031	0.604131
Uqcrh	0.109334	0.656839
Cst3	-0.281932	0.612626
Atp5j	0.072124	0.339457
Fau	0.0747812	0.590392
Calm3; Calm1; Calm2	0.504226	0.568602
Rpl35	-0.133527	0.609273
Nid1	0.291367	0.560729
Clcc1	0.362751	0.541218
Mrpl34	-0.00934721	0.981468
Ndufa8	-0.0994288	0.812313
BC031353; Fam214a	0.0750437	0.390995
Mtdh	-0.0097367	0.979999
Mrpl32	-0.00334459	0.97815
Hmox1	0.352747	0.513423
Tpm2	0.444154	0.432752
Mrps7	0.0613317	0.793595
Slirp	0.110581	0.455973
Iqsec3	0.557321	0.474082
Rcn2	0.115911	0.710304
Hk2	0.147054	0.805493
KRT1	-0.437538	0.745682
Ctsa	0.225397	0.687487
Naca	-0.0234308	0.934258
Mrpl51	0.118941	0.826646
Gpnmb	0.215474	0.640447
Tmem209	0.243478	0.69337
Mrps33	0.107612	0.856299
Fn1	-0.142999	0.528727
Lin7b	-0.0159606	0.961769
D10Bwg1379e; Arfgef3	0.00042896	0.998693
Rps15	-0.00770676	0.983632
Lamp2	-0.0213571	0.926323
Copz1	0.367704	0.535797
Hist1h1b	0.615552	0.516133
Pzp	0.0423456	0.87036
Alyref	-0.195741	0.141004
Hist1h2bb	0.86687	0.653916
L2hgdh	-0.0512779	0.945401
KRT2	-0.662021	0.350391
Hist1h1c	0.380809	0.659422
Ssr4	0.0228802	0.967413
Rpl31	-0.148933	0.588964
Fus	-0.274766	0.210443
Rpl22l1	-0.257474	0.328929
Eif2s2	-0.0660032	0.935625
Hist2h2ac	0.122727	0.965948
Ptrf; Cavin1	-0.512702	0.0234284
Tmem120a	-0.292808	0.807455
Sdpr; Cavin2	-0.507302	0.035167
Slc25a46	-0.800832	0.18252
Klb	-0.686421	0.285168
Sub1	-0.185251	0.759102
Rbx1	-0.474547	0.383261
Hdgf	-0.684063	0.080955
Cd34	0.0472752	0.966482
KRT9	-0.476797	0.601107
Csda; Ybx3	-0.704447	0.105534
Ybx1	-0.920866	0.065794
Gm10177; Sec61g; Gm11575; LOC102637269; Gm4184	-1.52756	0.557329
Stk4	-1.43608	0.0892432
Hat1	-1.66781	0.259479
Hmgb2	-1.16039	0.308203
Krt76	-2.14151	0.169621
Vasn	-0.281538	0.711525

## Sheet: Fig_4D
Gene_Symbol	log2_fold_change	p_val
Wbp2	0.738576	0.246281
Gsn	1.84992	0.286481
2010107H07Rik; Smim4	0.824711	0.0788469
Abcb6	-0.425375	0.562614
Slco3a1	0.219941	0.702219
Rftn2	-0.463091	0.0170031
Gas1	1.3976	0.145177
Laptm4a	0.558131	0.0860082
Bri3bp	0.466628	0.340912
Tmem97	1.99834	0.0183797
Tmem238	0.314171	0.196171
Cav1	1.0495	0.0132097
Vkorc1l1	0.208658	0.670212
Bsg	-1.79619	0.0261538
Tmem199	0.523101	0.154706
Kdelr1	0.372394	0.153892
1110057K04Rik; Ldah	0.0455782	0.803592
Timm17a	-0.0803004	0.870641
Cav2	0.758221	0.00241023
Npc1	0.405387	0.293975
Ephx1	2.10077	0.0176496
Nptn	-0.71257	0.114777
Ube2d3	0.496282	0.122419
Atp6v0c; Atp6v0c-ps2	0.226366	0.350324
Kdelr2	-0.0731501	0.95952
Slc25a30	0.650437	0.0585117
Vdac2	0.8307	0.148251
Vdac1	0.631439	0.203728
Dpy19l1	0.0475656	0.927637
Emb	-0.490698	0.24035
Scamp5	0.236184	0.491745
Crls1	0.68978	0.14261
Alg10b	0.143391	0.727286
Actr3	0.633779	0.385584
Sgcb	0.343672	0.45921
Abcb1b	1.06743	0.0138466
Cd63	-0.00332924	0.990533
Itprip	0.661845	0.151993
Acot1	0.66612	0.227825
Gyk; Gk	0.813575	0.0634297
Slc25a20	0.676166	0.119041
Tm7sf2	0.368403	0.217092
Tspan6	0.0456159	0.917416
Prkaca	-0.0550919	0.881304
Pgs1	0.617823	0.45207
Rab3d	-0.325013	0.585705
Cnih4	0.553272	0.0199359
Golt1b	0.0751437	0.803249
Gpr107	0.206171	0.50163
1110001A16Rik; Cebpzos	0.623679	0.201906
Ghitm	-0.114407	0.690838
Dpysl2	0.608837	0.123404
Tmem14c	-0.0724081	0.799355
Syngr2	0.00272718	0.990348
Lmbrd1	-0.0138045	0.960101
Yif1a	-0.0481152	0.958703
Arxes1; Arxes2	1.06995	0.0183249
Galnt4	0.0964472	0.70557
H13	0.00451315	0.988959
Rtn3	0.0350943	0.9102
Flnc	0.42143	0.0482027
Tmem109	0.102858	0.732799
Kdelr3	0.242011	0.534599
CYTB	0.3083	0.498139
Lpar1	0.110742	0.751619
Myadm	1.15087	0.0695381
Tspan11	0.0333441	0.940398
Galnt1	-0.304794	0.46664
Slc6a8	0.0918215	0.802012
Ptplad1; Hacd3	0.7244	0.455832
Slc44a1	0.15091	0.467946
Ndc1; Tmem48	0.234928	0.544028
Reep5	0.437137	0.197456
Tmem87a	-0.0540555	0.76389
Dpy19l4	-0.517891	0.54502
Pnkd	0.186476	0.593323
Derl2	0.823896	0.159742
Usmg5; LOC100504912; LOC102642507	-0.104547	0.693792
Degs1	-0.101813	0.622333
Clptm1	0.209673	0.440759
Ggcx	0.324255	0.636753
Rce1	0.200401	0.576661
Wls	1.17319	0.0915853
Dirc2	0.385706	0.468477
Timm17b	0.373857	0.261356
Trim32	-0.110467	0.479368
Ndufa11	0.331454	0.619993
Dhrsx	0.036428	0.918295
Rpl18a	0.586092	0.590835
Eif3g	0.376722	0.273125
Scamp2	0.319851	0.463031
Prkaa1	0.0428612	0.717066
APOA1	-0.467272	0.323554
Endod1	0.0108409	0.972571
Sec23b	0.0243826	0.753376
Zfyve27	-0.554162	0.718507
Acp2	-0.0144649	0.954729
Rbbp7	0.549543	0.454804
Slc35b1	0.638155	0.126673
Mpv17	0.600442	0.0919935
Mtch1	0.427442	0.030769
Gdi2	0.221004	0.304211
Pign	0.514067	0.101372
Iars	1.30567	0.23211
Grm1	0.723641	0.10891
Cers2; Lass2	0.190713	0.431147
Cyb5b	0.0328457	0.908224
Slc15a4	0.219358	0.58044
Ap2a1	2.02551	0.26303
Mapk1	0.1652	0.253284
Capn6	0.465233	0.331224
Arpc2	0.804667	0.111105
ATP6	0.305243	0.389251
Cd151	0.0486091	0.727921
Ywhaq; LOC102634437; Gm11226; Ywhaq-ps3; Cdk5rap2	0.404049	0.12784
Slco2a1	0.149968	0.559874
Slc38a2	0.271521	0.384256
Tmbim6	0.55338	0.074501
Nsdhl	0.362217	0.177393
Lpcat3	0.295209	0.292838
Stt3b	0.0854425	0.464333
Cd81	-0.0400351	0.891679
Sptlc1	0.773372	0.0884932
Copb1	0.873644	0.133724
Rpl15	1.02914	0.16187
Ppt1	-0.321035	0.400505
Slc7a1	0.309538	0.237358
Bckdhb	0.664831	0.0803192
Zdhhc13	0.748655	0.195739
Gpr89	0.497049	0.0578091
Vmp1	0.429147	0.271943
Rps19	1.14208	0.151268
Adck1	-0.121857	0.743637
Eif4g2	0.83354	0.0383647
Scarb1	0.00424786	0.992257
Tecr	1.40503	0.351813
Uqcr11	-0.220569	0.490361
Dhcr7	0.704973	0.300904
Syvn1	0.553825	0.2947
Adck5	0.33935	0.53789
Rplp0	1.1121	0.0986192
Tmem115	-0.123754	0.780012
Mpdu1	0.0951247	0.741163
Atp7a	0.591735	0.281056
Dync1h1	0.494623	0.204517
Slc16a1	0.109177	0.74298
Colec12	0.411582	0.230651
Dnajc5	0.21849	0.399118
4930471M23Rik; Slc35f6	0.160614	0.111403
Kdsr	0.424657	0.126265
Elovl1	0.1422	0.554386
Sc4mol; Msmo1	0.487167	0.263264
Mcm6	0.650823	0.323392
Dad1	0.358893	0.401532
Pon3	0.130034	0.701781
Ech1	0.127647	0.759672
Sptlc2	0.638227	0.168134
Slc35b2	0.462626	0.240603
Slc7a5	0.23685	0.426462
Tmx4	0.165932	0.575863
Ostc	0.424039	0.209053
Emc4	0.205299	0.565011
P2rx4	0.0399719	0.877663
Rpl35a-ps4; Rpl35a; Rpl35a-ps2; Gm10243; Rpl35a-ps5; LOC100862595; Gm14279; LOC100048620	0.816775	0.208697
Slc5a3	0.47468	0.271667
Itga3	0.349742	0.55373
Slc35a1	0.10695	0.758665
Abcc1	0.56704	0.209903
Coa3	0.18787	0.579747
Fitm2	0.227273	0.0727914
Ppm1l	-0.0581506	0.904116
Pld3	0.0858597	0.531092
Slc17a5	0.212059	0.585168
Derl1	0.375507	0.354656
Pgd	0.619808	0.384218
2410015M20Rik	0.091921	0.676272
Spcs3	0.202013	0.600602
Tm9sf3	0.203241	0.412923
Tmem63a	0.802474	0.169515
Tm9sf2	0.143856	0.607803
Ppap2b; Plpp3	0.248549	0.324581
B4galt1	0.191785	0.492793
Vamp3	-0.254414	0.527798
Dpy19l3	0.137957	0.590621
Sgpp1	0.456823	0.334867
Aars2	0.28884	0.27333
Yipf3	0.383296	0.167636
Rhob	-0.0641088	0.867031
Gnai3	0.317551	0.177183
Eif4e	0.253111	0.528224
Tmem160	0.496596	0.38693
Scamp4	0.471861	0.0620047
Fkbp8	0.19163	0.124178
Elovl6	0.485899	0.0525865
Sfxn5	0.205534	0.649511
Flvcr1; Mfsd7b	0.30332	0.206487
B3galnt1	0.346375	0.264081
Gpaa1	0.614942	0.107535
Asns	0.352613	0.188386
Ncstn	0.128875	0.509566
ATP8	0.209988	0.637052
Pdk3	0.206243	0.632391
Lmf2	0.418886	0.215158
Agpat4	0.417261	0.462151
Rhot1	0.526929	0.108035
Atp13a1	0.65553	0.194038
Carkd; Naxd	0.216969	0.279562
Gls	0.366873	0.451637
Ebp	0.334093	0.587229
Cox7a2	0.323463	0.408824
Fundc2	0.0788361	0.801643
Nt5dc3	1.0232	0.0892397
Wfs1	0.364949	0.290453
Alg1	1.38064	0.178562
Slc44a2	-0.0882954	0.756093
Cyfip1	1.04078	0.116075
Steap1	0.223868	0.460098
Capn1	0.660356	0.0489972
Sdhc	0.450641	0.361291
Clptm1l	0.220068	0.55433
Emc6	0.459929	0.441095
Slc30a7	0.830365	0.354146
Chpt1	0.584239	0.217737
AI480653; Xxylt1	0.44707	0.358442
Hgsnat	0.169076	0.615095
Sppl2a	0.135756	0.762491
Rplp1	0.675048	0.0793545
Tmem245	0.376772	0.450649
Chst14	0.188374	0.551697
Praf2	0.486747	0.330866
Ppp2r1a	0.582315	0.00547159
Zdhhc3	0.614722	0.237661
Opa3	0.741499	0.245105
Plscr1	0.261925	0.589376
Bcap29	0.382688	0.401424
Rap2c	0.264945	0.280408
Golim4	0.103175	0.390126
Tm7sf3	0.659254	0.281693
Yipf4	0.264679	0.335291
Tmx1	0.503735	0.305447
Stx7	0.321586	0.529285
Atl2	1.79598	0.358673
Nploc4	0.0767992	0.888942
Cyp51	0.426633	0.401084
Aqp1	0.578467	0.270569
Rer1	0.304497	0.236491
Gpx8	0.156977	0.522482
Cyp2d26	0.218367	0.68746
KRT16	1.34286	0.659609
Slc1a4	0.106214	0.436914
Tmem33	0.455832	0.223734
Itm2b	0.316954	0.510167
Cds2	0.390327	0.147457
Rhbdd1	0.842515	0.273421
Ifitm2	0.202876	0.617561
Tmem167	0.110845	0.632074
Rdh14	0.151633	0.52407
Cope	0.16033	0.689439
Plbd2	0.217265	0.611903
Ppic	0.228229	0.384237
S100a11	0.103171	0.739413
Slc3a2	0.193504	0.553033
Rars	0.485234	0.225411
Zmpste24	0.143122	0.618823
Srprb	0.03545	0.895541
Slc29a1	0.45526	0.220289
Slc6a9	0.434894	0.382768
Sccpdh	0.244384	0.452877
Tagln2	0.270898	0.552385
Fdft1	0.468091	0.154662
Atp6v1h	0.67998	0.234591
Akap1	0.879178	0.319548
Cers6; Lass6	0.503135	0.346745
Slc23a2	-0.0911282	0.788468
Mfsd10	0.202727	0.500539
Cd276	-0.0125849	0.949194
Nudt16l1	1.08268	0.085207
Atf6b	0.438892	0.350978
Ywhab	0.552323	0.0170196
Bet1	0.0108072	0.96919
Apmap	0.08683	0.736102
Taldo1	0.193872	0.404129
Fam20b	0.27023	0.514345
Scamp1	0.235863	0.349122
Ppp1cc; Gm5601	0.588583	0.0863413
Ppp1ca	0.863036	0.0722904
Sgta	0.50639	0.0921066
Nceh1	0.0172955	0.944699
Scarb2	0.13687	0.607286
Spns1	0.238711	0.334696
Cdh2	0.10846	0.673297
Cox7a2l	0.330722	0.403731
Pigu	0.574088	0.171112
Slc6a6	0.678071	0.393159
Pkd2	0.332094	0.251541
Ctnna1	-0.114434	0.323114
Rpl8	0.987967	0.169998
Aldoa	0.675369	0.162208
Sar1a	0.540981	0.0489923
Abcg2	0.369192	0.421588
Rab6a	0.244259	0.30385
Pdxdc1	0.733284	0.0332804
Fis1	-0.123047	0.401934
Trim59	0.719296	0.0205792
Abhd16a	1.03759	0.344037
Abhd12	0.220731	0.454159
Fam3c	0.16928	0.61772
Mthfd1	0.801064	0.00255942
Ermp1	0.256114	0.463142
Psmc6	0.795387	0.303607
Kpnb1	0.527675	0.056724
Ilf3	-0.29119	0.655955
Vamp8	0.0364135	0.893155
Spryd7	0.26733	0.353374
Slc25a3	0.367697	0.281916
Ano10	0.357816	0.353816
Rcc2	0.666621	0.0213009
Cox20; Fam36a	-0.403056	0.580024
Pgk2	0.597722	0.166592
Yipf5	0.540886	0.186461
Fcgrt	0.0447008	0.916846
Cpne1	0.0725164	0.816712
Tmem168	0.66973	0.103298
Rnf185	0.6128	0.370186
Cyp39a1	0.429442	0.250977
Dars2	0.72711	0.0319708
Adpgk	0.35893	0.239237
Ank	0.398864	0.346904
Slc12a2	0.335009	0.284781
Spg21	0.303276	0.101729
Alg11	1.62329	0.340703
Fgfr2	0.748321	0.432092
Rangap1	0.785075	0.0608954
Zdhhc20	0.178648	0.527758
Arl1	0.45878	0.230329
Stoml2	0.194415	0.549393
Tmed10	0.302499	0.409204
5730494N06Rik; Tmem230	-0.0314669	0.933671
Mboat7	0.168076	0.303419
Park7	0.432714	0.225278
Uso1	0.0932744	0.642948
Slc38a4	0.227208	0.320854
Tmem165	0.048432	0.79511
Cox15	0.609838	0.291106
Eif2s1	0.884754	0.291085
Stt3a	0.621924	0.232228
Cdc42	0.297694	0.151783
Tmem129	0.286678	0.350142
Tmem186	1.08008	0.160738
Tmem119	-0.194969	0.538852
Tmx3	0.167377	0.56383
Spata7	1.0942	0.0743727
5730469M10Rik; Fam213a	0.0217914	0.944176
Cand1	1.29998	0.182519
Sec61b	0.13993	0.650603
Kdelc2	0.0573967	0.830711
Hsd17b12	-0.0793307	0.781704
Ier3ip1	0.111699	0.645143
Hmox2	0.287257	0.329024
Gorasp2	0.388354	0.0624426
Timm23	0.653287	0.298316
Tnpo1	0.525324	0.142023
Pecr	-0.171404	0.570591
Mtch2	0.884519	0.290095
2010107E04Rik	-0.174428	0.634533
Btk	0.269518	0.629078
Esyt2	0.200561	0.522946
Scamp3	0.0087414	0.968539
0610031J06Rik; Glmp	0.213554	0.561533
Tmco1	0.337375	0.419082
Mxra7	0.274752	0.270076
Mrc2	0.0156896	0.953439
Aaas	0.518362	0.196933
Fads1	0.464353	0.267331
Dhcr24	0.523595	0.257559
Pi4k2b	-0.0276392	0.846971
S100a10	-0.150883	0.0576269
Psmc2	0.553893	0.386881
Rab2a	0.169766	0.515255
Cers5; Lass5	0.373345	0.465802
Vars2	0.438633	0.0294691
Gpi1	0.630202	0.105579
Atp6v0d1	0.853647	0.0897471
Rab3c	0.197472	0.518847
Kank4	0.427449	0.209651
Psmd11	0.222737	0.164883
Gcat	0.497793	0.193246
Hras1; Hras	0.411516	0.481155
Abcb10	0.270775	0.490718
Pcyox1	0.00265187	0.993262
Clcn5	1.62505	0.299227
Vat1	-0.0862222	0.717434
M6pr	0.194035	0.584206
Bcl2l13	-0.0358238	0.920419
Rtn4	0.0345081	0.90413
Rbm14	0.147734	0.282881
Vamp7	0.176347	0.510732
Atp5l	0.0237781	0.935901
Bcl2l1	0.19445	0.321047
Pdk1	0.398643	0.2758
Ahsa1	0.257086	0.546129
Flnb	0.535266	0.0903742
Nt5c3	0.176713	0.685029
Surf4	0.366488	0.215847
2410091C18Rik; Ndufaf7	0.294589	0.280579
Rap2a	0.292649	0.556811
Clic1	0.326856	0.468181
Atp6v0a1	0.533682	0.03258
Comt	0.286464	0.498348
Prmt1	0.389776	0.319693
Serhl	0.296163	0.508004
Lpgat1	0.241935	0.21423
Timmdc1	0.262996	0.295421
Rap1b	0.225007	0.442095
Osmr	0.17226	0.589268
Rab23	0.130582	0.511864
Pigt	0.50627	0.163252
Hsp90aa1	0.645338	0.0372724
Arf6	-0.028808	0.844056
Lclat1	0.574895	0.39393
Ipo7	0.416013	0.00741893
Tuba1a	0.482604	0.450366
Mpv17l2	0.11253	0.581193
Sil1	-0.0330413	0.903234
Atp2a2	0.472877	0.239851
Pls3	0.538636	0.0952106
Sqle	0.958758	0.224724
9530068E07Rik	-0.0667497	0.744722
Rragb	0.609968	0.157503
Ndufc2; LOC102641347	0.353805	0.400453
Bax	0.649746	0.104864
Hsdl1	1.66376	0.353229
Rpl6	0.700669	0.224484
Gmps	0.205549	0.207345
Tmem30a	0.203296	0.438983
H60b	0.195268	0.61221
Eif3j1; Eif3j2	1.01137	0.110652
Ptges	0.138422	0.64816
Capn2	0.906858	0.106361
Rps20	0.584532	0.22831
Zdhhc6	0.143912	0.540107
Eci1	0.474216	0.160068
Bcap31	0.214966	0.352895
Slc1a5	0.201351	0.556894
Hpcal1	-0.600581	0.512217
Anxa4	0.0973527	0.517836
Me2	0.536679	0.127818
Far1	0.607357	0.330582
Eif3b	0.754663	0.0111372
Tmem41b	-0.107476	0.646828
Letm1	-0.422858	0.232939
Tm9sf4	0.316031	0.495872
Lars2	0.14637	0.63617
Rab5a	0.141221	0.568224
Wdr1	0.756573	0.0725327
Tmtc3	0.505394	0.170144
Cox10	0.246249	0.380794
Tmem106b	0.269656	0.331619
Asna1	0.318513	0.218981
Mlec	0.219415	0.448688
Aldh4a1	1.02473	0.198716
Mfsd1	0.645735	0.405794
Ywhag	0.521225	0.161803
Ddx39b	0.403506	0.163691
Rdh11	0.21392	0.485985
Ugt1a6a	0.163491	0.229892
Tmem126a	0.17623	0.643423
Hax1	0.397434	0.473382
Tmed1	0.184396	0.271079
Nrp2	0.110919	0.627425
Ldha	0.519581	0.106444
Ppox	0.466976	0.153134
Edem3	0.451094	0.590192
Ogt	0.70089	0.0972245
Rab14	0.153419	0.342455
Vapb	0.165465	0.593031
Lss	0.292296	0.3214
Alg2	0.582754	0.229769
Arl8b	0.134999	0.577781
Eef1g	0.494674	0.144588
Arf4	0.220088	0.567266
Gna11	0.372522	0.342596
Pon2	-0.0146205	0.960747
Snx27	0.355916	0.317422
Pigk	0.244824	0.451154
Tmed2; Gm21540; LOC100862175; Gm10698	0.217509	0.23396
Procr	0.27746	0.474662
Map4k4	0.782652	0.078747
Rab10	0.0948191	0.726868
Ncln	0.504091	0.352185
Hsp90ab1	0.592973	0.0752873
Ndufa4	0.133837	0.71368
Zadh2	0.464485	0.49356
Atp6v0a2	0.471814	0.0646123
Crot	0.13869	0.39541
Acsf3	0.355731	0.0927514
Rabac1	0.26376	0.507949
Slc25a11	0.345843	0.481822
Uba1	0.586686	0.279382
H2-D1	0.136459	0.671445
Rab8a	0.216071	0.450183
Aldh3a2	0.0157475	0.965878
Rac1	0.323717	0.408
Slc25a4	0.53735	0.435804
Gpd2	0.350269	0.148926
Atad1	0.584096	0.384575
Sars	0.415881	0.552863
Dars	0.133082	0.598524
Scp2	0.0856258	0.836502
Src	0.286221	0.477031
S100a4	0.174513	0.36149
Gls	0.552095	0.0701905
Amacr	0.02573	0.949209
Slc35a2	-0.0653124	0.767455
Cpt1a	0.0828141	0.817914
Agps	0.381004	0.281656
Abcb7	0.395789	0.319981
Ano6	0.348496	0.319835
Iars2	0.37492	0.170118
Slc25a22	0.187592	0.533557
Gnaq	0.648783	0.296186
Erbb2ip; Erbin	0.485611	0.212926
Lnp; Lnpk	0.179763	0.498957
Ergic3	0.111952	0.730878
Vps26a	0.215277	0.3246
Ssr1	-0.0868685	0.698813
Steap3	0.393966	0.345282
Rab5b	0.0799199	0.698646
43895	0.690107	0.246115
Acsl1	0.211938	0.497139
COX2	0.426822	0.251182
Sec23a	-0.220296	0.614209
Acot7	0.251684	0.102822
Trim28	0.308548	0.356124
Eef1d	0.445588	0.419188
Lmf1	0.228093	0.632826
Ap2a2	0.47733	0.04303
Mgat2	0.0858975	0.818725
Ctsd	-0.138569	0.535786
Tmem214	0.168921	0.749721
Slc12a7	0.24034	0.284487
Vps26b	0.302997	0.0184538
Slc38a1	0.407832	0.439046
Stx12	0.0373679	0.856692
Tm2d2	0.563272	0.387367
Marc2; Mosc2	0.495212	0.289431
Rab12	0.107867	0.681649
Gabarapl2	0.17343	0.708229
Slc25a5	0.796432	0.491263
LOC102631912	0.159349	0.655674
Por	0.394769	0.367618
Sco2	0.29243	0.423476
Serinc1	0.225945	0.600871
Psap	-0.0257255	0.915997
Plxnb2	0.259424	0.440091
Rab7	0.0601586	0.758414
Agpat1	0.242608	0.645301
Cct8	0.300496	0.220216
Arf3	0.131777	0.41058
Tln1	0.439642	0.113118
Apob	-0.00105133	0.998856
Gstp2	-0.0518133	0.679161
Poglut1	-0.00624154	0.985895
Rhog	0.350416	0.475995
Ptcd3	0.494756	0.0536363
Tpp1	-0.106588	0.403132
Impad1	0.0366171	0.908733
Nfs1	0.525675	0.269457
Sfxn3	0.296103	0.362894
Atp5k	0.112039	0.773027
Atp1b3	0.0639806	0.856315
Copg; Copg1	0.516308	0.062524
Igf1r	0.246488	0.467836
Hsd17b11	0.162831	0.663769
Sigmar1	0.0353224	0.92867
Plxna1	0.343693	0.266526
Gnai2	0.257036	0.299586
Rhot2	0.599771	0.247384
Rab3gap2	0.834646	0.400843
Tpbg	-0.0198666	0.923984
Arl6ip5	-0.0302189	0.895237
Plec	1.39518	0.0497336
Acsl3	0.345944	0.358081
Psmd8	0.332037	0.462781
Slc25a13	0.426874	0.239336
Slc33a1	0.168377	0.739268
Alg5	0.155581	0.519941
Nup155	0.593553	0.0721043
Tmx2	0.225056	0.263956
Rad23b	0.216612	0.322019
Aacs	0.597295	0.445668
Rdh13	0.281968	0.309789
Soat1	1.09703	0.154625
Pcyox1l	0.178735	0.334994
Bnip1	0.126881	0.614198
Slc25a24	0.330238	0.296225
Echs1	0.284014	0.463496
BC017643	0.135936	0.584591
Mfn1	0.804099	0.28299
Atp1a1	0.376969	0.371415
Rab11b	0.15511	0.441441
Rab1b	0.0783085	0.780783
Slc25a12	0.656064	0.316245
Igsf8	0.176931	0.407668
Ddr2	0.166238	0.707448
Rab9	0.257974	0.374655
Nup50	0.214258	0.494235
Bcs1l	0.51543	0.348775
Mapre1	0.405649	0.172129
Dcakd	0.18689	0.497261
Yif1b	0.180707	0.419128
Sacm1l	0.278954	0.53774
Sec63	0.351034	0.265216
Got1	0.242322	0.319534
Prdx5	0.0964972	0.718013
Ilvbl	0.774703	0.415275
Ap1g1	-0.730787	0.458112
Csde1	0.45523	0.15494
Spryd4	0.258332	0.25314
Fam49b	0.173448	0.825903
Mia2	0.334491	0.139987
Ehd2	0.327944	0.467933
H6pd	-0.067362	0.79884
Lpcat4	-0.0562728	0.863568
Dhrs1	0.209387	0.615831
Xpo1	0.21976	0.357917
Pgrmc2	-0.00254638	0.991839
C1galt1c1	0.420567	0.287225
Gcsh	0.429553	0.254081
Rab31	0.0963495	0.599318
5430435G22Rik; Rab7b	0.308163	0.296227
Ppp2cb	0.205418	0.313349
Mospd2	0.0923489	0.745526
Kpna2	0.482353	0.321466
Nup160	0.644204	0.751916
Fndc3a	0.4129	0.291504
Ptgis	0.130666	0.639438
Gls2	0.536479	0.253507
Mut	0.755314	0.148337
Clpp	0.348133	0.144695
Pdgfra	0.19542	0.623049
Il6st	0.120565	0.716053
Cmpk1	0.810541	0.175039
Vkorc1	0.657248	0.207466
Rap1a	0.0241728	0.918369
Cct2	0.405441	0.26992
0610007P14Rik; Erg28	0.184111	0.546556
Acadsb	0.459017	0.262912
Rps3	0.368956	0.0432467
Ctnnb1	0.523458	0.105461
Eif4a1	0.513963	0.305402
Cyb5r3	0.133748	0.646298
Pgk1	0.559122	0.24829
Ankle2	0.203441	0.434788
Coq4	0.536543	0.164125
Pla2g4a	0.162675	0.437052
Flna	0.515165	0.11769
Afg3l2	0.304947	0.408698
S100a6	0.331705	0.453537
Fdps	0.372784	0.109357
Nras	0.283855	0.512751
Scpep1	-0.225077	0.264614
Rps4x	0.551313	0.37796
Bzw1	0.523943	0.261221
Atp1b1	0.31192	0.529175
Ywhae	0.507433	0.267096
Rab33b	0.129934	0.602888
Pfn1	0.314864	0.460296
Tpm3	0.496107	0.139719
Atp2b1	0.349962	0.335193
Atp5o; LOC100047429; LOC102641678	0.0861283	0.761641
Epha2	0.134987	0.52412
Ddx39	0.442374	0.0797705
Irgm1	0.0217384	0.94251
Rab5c	0.139688	0.383133
Cpd	0.165731	0.473026
Rab1; Rab1a	0.308963	0.308709
Atp6v1c1	0.645081	0.242523
Agk	0.278738	0.366613
Dgat1	0.923066	0.358974
Asph	0.258878	0.650934
Psmd3	0.483231	0.141909
Lamtor3; Gm5900	0.213975	0.246019
Ndufs1	0.507852	0.296796
Fam162a	0.211911	0.745187
Abhd1	0.343489	0.440173
Hint2	0.266357	0.364266
Cd9	-0.382335	0.0365058
Capzb	0.639634	0.36446
Ivd	0.379922	0.185614
Armc1	0.264959	0.43718
Hmgcr	1.49458	0.0548491
Slc25a10; 0610009L18Rik	0.209966	0.3787
Lman2	0.144818	0.511274
44076	0.371	0.317682
Mrps2	0.247102	0.347658
Gcn1l1	0.166202	0.82817
Acad9	0.434572	0.290526
Pcmt1	0.242447	0.605657
Acaa2	0.305406	0.327666
Sucla2	0.336735	0.278015
Parl	0.127672	0.732592
Hsd17b4	0.162939	0.585825
Gnas	0.288511	0.259984
Faf2	0.389125	0.147362
Vps35	0.537337	0.111514
Gdpd1	0.254655	0.259519
Ndufa9	0.196505	0.581908
Acox3	0.860588	0.346687
Sdhd	0.0970746	0.775925
Sfxn1	0.353968	0.387427
Mrpl23; Mrpl23-ps1	0.048842	0.90166
Fen1	-0.352869	0.694296
Ptgr1	0.684885	0.0514137
Crabp1	0.494738	0.169173
Rheb	0.26656	0.306983
Agpat3	0.258903	0.453876
Mybbp1a	-0.56982	0.583719
Xpnpep1	0.245767	0.427664
Rras	0.0537097	0.818807
Hnrnph1	0.38092	0.19792
Rragc	0.240119	0.0223978
Ptpra	-0.562021	0.484273
Hsd17b7	0.253389	0.228196
Acta1	0.4738	0.125218
Bzw2	0.412917	0.0228898
Acadvl	0.1806	0.539413
Ptbp1	0.378599	0.25594
Npepps	0.56361	0.026652
Gsto1	0.384771	0.00226418
Mpp1	-0.0893621	0.888282
Rala	-0.000411127	0.998256
Pef1	-0.204607	0.373972
Cd109	0.081961	0.746523
Tceb1; Eloc; LOC101056616; LOC102642819	0.334197	0.735292
Cldn25; Cldnd1	0.362088	0.30138
Rpl7	0.729179	0.273794
Glt8d1	0.129537	0.813373
Atp6ap1	-0.106877	0.62757
Ndufaf1	0.308771	0.439963
Srd5a3	0.161973	0.742509
Psmb5	0.227658	0.739699
Atp11c	0.503505	0.297615
Ufsp2	0.240272	0.329783
Pds5a	0.523902	0.0150963
Nipsnap3b	0.0505246	0.858716
Ywhah	0.251052	0.0213168
Eif5a	0.33741	0.463024
Rab32	0.136968	0.460022
Prdx4	0.0888052	0.625561
Mdh2	0.348224	0.174171
Acads	0.381658	0.25526
Serpinf1	0.0642151	0.899772
Ctps	0.693169	0.188224
Gnb2	0.599218	0.267409
Ndufb11	0.363209	0.467508
Sf1	0.190132	0.569866
Bcat2	0.622137	0.279288
Prpf19	0.807475	0.202389
Mogs	0.224785	0.449268
Spcs2	0.386592	0.444612
Eif2s3x	0.621673	0.0628769
Acsl5	0.559741	0.391966
Eprs	-0.466312	0.631536
Fkbp10	-0.119466	0.552314
Ergic1	0.164089	0.577528
Zfpl1	0.252977	0.559104
Ssr3	0.0862905	0.778984
Isoc2a	0.30493	0.348701
Gnpat	1.09401	0.471181
Ptgs1	0.191778	0.548869
Megf8	0.834188	0.314885
Myh9	-0.412955	0.792114
Pdhb	0.436492	0.219248
Hsd17b10	0.214947	0.341176
Acbd3	0.242606	0.332571
Rps27a; Rps27a-ps2; LOC100042019	0.0575179	0.910427
Rpl5	0.683407	0.181174
Csnk2a1	0.189787	0.529289
Anxa6	0.283398	0.129297
Rps6-ps4; Rps6; LOC105244208	0.523806	0.414434
Hnrnpm	0.531146	0.147275
Steap2	-0.0594876	0.874157
Ptpn1	0.097074	0.605342
Psmd14	0.318964	0.375396
Rps15a	0.813237	0.235994
Man1a2	0.08868	0.343482
Rras2	0.129741	0.557853
Ndufs2	0.499794	0.10122
Stx4a	0.353772	0.396566
Phgdh	0.282916	0.0402711
Timm50	0.230654	0.436291
Slc25a1	0.132116	0.744283
Api5	0.380562	0.00147342
Apoo	0.114083	0.735058
Tceb2; Elob	0.358516	0.174573
Prkacb	0.173582	0.0010819
Napa	0.518879	0.0352361
Rap2b	0.116134	0.551789
Osbp	0.328603	0.537074
Erp29	0.000672617	0.99837
Lrpprc	0.80288	0.181592
Decr1	-0.0588486	0.850224
Pycr2	0.31297	0.268306
Atl3	0.35801	0.369601
Tollip	0.299675	0.401277
Snx3	0.378136	0.410519
Gnao1	0.270428	0.41438
Crat	-0.0427252	0.667314
Rpn2	0.290978	0.443637
Acsl4	0.121582	0.484677
Bub3	0.181765	0.720434
Nnt	0.336587	0.468291
Ndufs3	0.270298	0.294198
Pi4k2a	0.286082	0.270979
Rpl13a	0.88392	0.24493
Rps2; Rps2-ps13	0.578035	0.3182
Acot9	0.474819	0.108282
Mrps27	0.378237	0.122607
Acox1	0.103123	0.581957
Naalad2	0.169585	0.472365
Fdxr	0.467133	0.338896
Hsp90b1	0.123236	0.611938
Mthfd1l	0.536637	0.168854
Ap2b1	0.736545	0.171924
Pigx	0.121436	0.729623
Mrpl4	0.180788	0.509471
Rhoa	0.0775859	0.33878
Ap2m1	0.956785	0.220311
Nsf	0.446689	0.0607668
Inf2	0.627585	0.250281
Clpx	0.398102	0.316692
Celf1	-0.0927018	0.788828
Vdac3	0.636149	0.185498
Shmt2	0.512252	0.180933
Dnaja1	0.322153	0.0310245
Txnip	0.362072	0.576151
Efemp1	-0.0509458	0.820792
Aup1	0.405475	0.355449
Actn4	0.931716	0.0149268
Sdhb	0.293699	0.445784
Man1a	-0.395663	0.417653
Psma5	0.323356	0.0785445
Psmd2	0.830467	0.331589
Glb1	0.033345	0.867723
Ganab	-0.0931024	0.558341
Tmem55b	0.424623	0.327343
Mrpl37	0.319785	0.142808
Tmem55a	-0.16761	0.546141
Rab18	0.0552499	0.756743
Lars	0.602286	0.368432
Ero1l	0.139346	0.197362
Rab4b	0.166046	0.5668
Atic	0.321149	0.25939
Eif1	0.849121	0.0735129
Mfge8	0.0815209	0.70734
Rab21	0.0596683	0.584656
Tor1b	0.00279466	0.99287
Golm1	0.667484	0.39224
Ufl1	0.391445	0.359416
Smpd2	0.18743	0.436561
Dhodh	-0.013881	0.955598
Ly75	0.120057	0.656173
Anxa7	0.0892622	0.647996
2510039O18Rik	1.13736	0.457771
Crtap	-0.0172113	0.945375
Tmlhe	0.353292	0.153484
Sqrdl; Sqor	0.180693	0.583269
Cyp20a1	0.236903	0.430112
Sec11a	0.205184	0.429526
Atp6ap2	0.202789	0.384433
Psmb4	0.172323	0.470008
Nedd4	0.476607	0.135489
Cyb5r1	0.434558	0.458905
Cox6c	0.570951	0.535731
Pafah2	-0.18548	0.576086
Lnpep	0.154526	0.464859
Trnt1	0.39637	0.0750517
Ywhaz	0.463111	0.376469
Tbrg4	0.201733	0.43833
Stx8	0.395764	0.384556
Kars	0.325204	0.421036
Ndufv1	0.437782	0.297787
Ogdh	0.637122	0.259026
Eef1b2	0.450444	0.28616
Sgpl1	0.0858506	0.784861
Adam10	0.105652	0.676779
Dhrs7	0.316798	0.688689
Ptges2	0.21333	0.454882
Snrpb	-0.156674	0.407863
Cyc1	0.274977	0.485108
Etf1	0.437884	0.251031
Nap1l1	0.579498	0.0607692
Cox4i1	0.311086	0.518278
5033414D02Rik; Plgrkt	0.642753	0.264401
Vars	0.623735	0.0767806
P4ha2	0.240383	0.668309
3110001D03Rik; Tmem261; Dmac1	0.22873	0.538544
Tcp1	0.485848	0.0972562
Tmem11	0.906042	0.37902
Rhoc	0.199708	0.399265
Eci2	0.0416085	0.884604
Dtymk	0.0716705	0.78381
Rpl19; Rpl19-ps11	0.606906	0.123796
Dnpep	0.242981	0.20827
Ociad1	0.207098	0.363293
Epb4.1l3; Epb41l3	0.44382	0.222848
Uqcr10	0.00673894	0.98034
Pdcd6ip	0.283422	0.198177
Axl	0.2321	0.221242
Sdha	0.39458	0.274979
Tapbp	0.279239	0.229772
Phb	0.516909	0.259947
Prl2c2	0.029992	0.913011
Uqcrc2	0.184429	0.580019
Idh1	0.253936	0.132707
Ptp4a2	-0.0192749	0.935152
Ncam1	-0.0808464	0.845368
Galnt2	0.0945816	0.555163
Hnrnpl	0.342303	0.379675
Aars	0.453572	0.0464719
Ethe1	0.324062	0.280065
G6pdx	0.123398	0.371329
Scd1	1.08572	0.413263
Etfdh	0.251953	0.567802
Trap1	0.439448	0.113162
Lrrc59	0.204859	0.69389
Ehd1	0.602339	0.301302
Cap1	0.714116	0.238421
Anxa5	0.274697	0.206253
Sec62	1.13372	0.442324
Eif3e	1.09247	0.0748827
Apoa1bp; Naxe	0.220667	0.172359
Hars	0.79712	0.12214
Il1rap	0.380179	0.395116
Epb4.1l2; Epb41l2	0.359071	0.308998
Etfa	0.232474	0.28641
Mrps10	0.368957	0.172852
Cnn2	0.217139	0.690176
B3gnt1; B4gat1	0.176727	0.605779
Ube2j1	0.133674	0.607998
Arl8a	0.230917	0.15215
Dpm1	0.141828	0.726035
2810407C02Rik; Selt; Selenot	0.360833	0.335795
Tmem43	-0.0118773	0.956909
Hnrnpll; Hnrpll	0.370702	0.230237
Man2a1	0.136749	0.65937
Gng12	0.391414	0.294487
Pam16	-0.121377	0.479481
Pgrmc1	0.292411	0.485968
Copa	0.370251	0.252801
Pofut2	-0.254649	0.494051
Pmpca	0.424188	0.119908
Mtap	-0.0429977	0.818868
Mmp2	-0.00413274	0.989441
Vwa8	0.496929	0.226987
Rps23	0.225133	0.750042
Ilf2	0.336679	0.102483
Htra2	0.380609	0.0666649
Ptgs2	-0.0207235	0.892759
Dpysl3	0.234239	0.49185
Cyp2j6	-0.00860112	0.974711
P4ha1	0.0401736	0.93126
Rps8; Gm15501	0.725237	0.306124
Dynll2	0.345408	0.0601733
Ddah2	0.353984	0.191432
Kdelc1	-0.0152317	0.951633
Tmem177	0.617948	0.433968
Ndufs8	0.504098	0.046002
Pgp	0.653118	0.533121
Cstf2	0.0440466	0.847308
Pdlim5	0.571218	0.0547561
Anxa2	0.102486	0.678386
Hadha	0.56936	0.291788
Ndfip2	1.10276	0.349479
Ralb	0.0165194	0.881442
Cpt2	0.205676	0.508456
Tuba1b	0.545463	0.284601
Tomm70a	0.378348	0.305594
Paics	0.405193	0.121772
Oat	0.38625	0.168858
Nucb1	-0.0832203	0.799187
Erp44	0.140232	0.539271
Tgfbr3	-0.0383781	0.888333
Rab43	0.373332	0.360247
Mgat1	0.0267448	0.959339
Rrbp1	0.465955	0.116798
Pck2	0.369613	0.116193
Erlin2	0.592948	0.137297
Rps5	1.01842	0.119089
Lap3	0.306668	0.21561
Dstn	0.279731	0.211898
Lbr	0.640977	0.409264
Emc1	0.24968	0.479986
Psat1	0.263882	0.278804
Hsph1	0.220213	0.0304747
St3gal1	0.308539	0.36893
Agpat6; Gpat4	0.101294	0.783359
Ndufa10	0.79194	0.340363
Brd4	0.471872	0.394145
Itpr3	1.07545	0.308664
Txn1	0.12766	0.177342
Sel1l	0.280842	0.51485
Sec61a1	0.683156	0.458566
Rpl9	0.701118	0.308848
Sars2	-0.186851	0.786343
Mrpl28	0.1656	0.478489
Fh1	0.387081	0.14781
Idh2	0.338505	0.176522
Frrs1	0.515775	0.118765
Mgrn1	0.333023	0.407138
Acadl	0.467903	0.155479
Ddost	0.0425372	0.864564
Tubb4b	0.559356	0.275757
Jagn1	0.0851723	0.581203
Mpc2	-0.0980715	0.735665
Mmgt1	-0.0343432	0.897195
Kras	-0.0216008	0.9452
Capns1	0.574856	0.1914
Acaa1a	-0.00979662	0.973009
Pgam1	0.412228	0.402025
Vcp	0.679206	0.171428
Ruvbl1	0.480593	0.002855
Gpt2	0.111301	0.25001
Flot1	0.249316	0.572701
Nup93	0.845472	0.208247
Comtd1	0.684897	0.0518698
Lta4h	0.736947	0.321712
Uqcrc1	0.367042	0.402251
Akr1a1	0.45903	0.264543
Pabpn1	-0.013039	0.896383
Ldhb	0.352149	0.113164
Plod1	-0.091207	0.582366
Tram1	0.856832	0.131548
Atp5f1	0.10987	0.707754
Rpl18	0.738606	0.119556
Poldip2	0.0881948	0.706454
Ahcy; Gm4737	0.464615	0.142239
Cspg4	0.059185	0.743563
Nomo1	0.197439	0.48186
Yars	0.161702	0.570465
Tardbp	0.22059	0.105792
Suclg1	0.366031	0.203213
Vcl	0.399526	0.119288
Suclg2	0.39644	0.153069
Pet112; Pet112l; Gatb	0.323243	0.0774324
Fubp1	0.226968	0.147918
Mrpl24	-0.0207155	0.941299
Gde1	-0.145802	0.560739
Cct6a	0.288736	0.416499
Arhgdia	0.271854	0.0890071
Vcam1	0.152148	0.663418
Emc3	0.0445174	0.707453
Grb10	0.430219	0.359915
Mgst3	0.533167	0.17846
Ppib	-0.150737	0.529959
Myof	0.573448	0.114317
Adam9	-0.246283	0.438496
Cox5a	0.221949	0.567327
Magt1	1.25603	0.414574
Atp5a1	0.0445811	0.860324
Plod3	-0.356197	0.242764
Tomm40	0.661788	0.361119
Timm44	0.230071	0.324085
Mcm3	0.841877	0.459029
Aldh1l2	0.64121	0.197331
Anxa1	0.235581	0.298825
Lgals3	0.0776847	0.406421
Cept1	0.0693864	0.85575
Rab34	0.152623	0.207933
Psma3	0.261098	0.0939254
Rps12	0.578075	0.121428
Tmed3	0.646805	0.427926
Prdx1	0.174061	0.0994937
Ptges3; Gm9769; Ptges3-ps; LOC100048119; LOC102641464	0.336391	0.390472
Ddx6	0.128117	0.635683
Hadh	0.307459	0.255712
Myl6	0.850038	0.14819
Mtx1	0.345034	0.54239
Khsrp	0.116675	0.407594
Cant1	0.115904	0.702379
Lox	0.0599248	0.913618
Pmpcb	0.527763	0.166629
Uggt1	0.0695225	0.791481
Glt25d1; Colgalt1	0.0955221	0.802646
Rpl7a	0.494823	0.266166
Atp5h	0.0919599	0.816618
Lrp1	0.106234	0.697771
Slc27a4	0.647579	0.520683
Eef2	0.473473	0.249264
Rnh1	1.48456	0.363972
Dnajc1	-0.0547409	0.887058
Ext2	-0.200133	0.43771
Col1a1	0.201546	0.6053
Mccc2	0.696699	0.118671
Sumf1	-0.271971	0.45789
Fasn	0.414512	0.202497
Pcna	0.222333	0.271195
Pdzd8	0.375104	0.139788
Got2	0.390641	0.257445
Idi1; LOC102635781; Gm38481	0.315615	0.102503
Cbx3	0.303901	0.311962
Maoa	0.582216	0.371065
Mbnl2	0.154769	0.309073
Mrpl53	-8.68959e-05	0.999706
Ddb1	0.280714	0.0931611
Gla	0.0729775	0.802149
Xrn2	0.287705	0.271555
44085	0.442617	0.281508
Ppa2	0.257806	0.306866
Glud1	-0.045471	0.907547
Opa1	0.626045	0.301565
Ssbp1	0.569758	0.137848
Igf2r	0.0301687	0.89536
Hspa8	0.337229	0.0784524
Acsf2	0.381793	0.206679
Acat1	0.230077	0.479038
Eps8	0.268537	0.0918145
Mrps30	0.269248	0.241924
Prdx2	0.389356	0.329893
Arpc1b	0.544949	0.0170204
Hsdl2	0.539057	0.356536
Psmb6	0.292176	0.444613
Hibch	0.321584	0.381716
Tor1a	-0.00359654	0.993573
Copb2	0.819322	0.123984
Pus1	0.892774	0.101528
Snd1	0.592265	0.0664009
Atp5c1	-0.0108696	0.970955
Xdh	0.818901	0.429664
Usp9x	0.236254	0.244688
Itga6	0.263892	0.3457
Acadm	0.313722	0.364716
Hspa1a; Hspa1b	0.216537	0.862095
Npm1	0.498096	0.253298
Aimp1	0.319095	0.152193
Mxra8	-0.448337	0.340813
Ndufb3	0.388307	0.534519
Ccdc109a; Mcu	0.704568	0.341837
Mdh1	0.329914	0.010935
Anxa11	0.0385872	0.542196
Txnrd1	0.711729	0.213493
Tufm	0.428667	0.102274
Sec22b	0.195972	0.507373
Gfm1	0.362064	0.120216
Stxbp1	0.298355	0.131973
Man1b1	-0.19521	0.672261
Aifm1	0.138482	0.649306
Cct7	0.536557	0.262084
Aco2	0.536913	0.158775
Rps25	0.682871	0.357619
Ndufb9	-0.18087	0.674366
Napg	0.00621946	0.983542
St13	0.318633	0.289652
Timm8a1	0.425364	0.335582
Fastkd5	-0.273019	0.711298
Psmd6	0.420175	0.231446
Rab35	0.468369	0.56061
Ide	0.533104	0.486086
Hadhb	0.274191	0.377303
Vapa	0.110254	0.641569
Glrx5	0.574733	0.25364
Hccs	0.00518689	0.98065
Arhgdib	0.113525	0.433981
Hnrnpf	0.599356	0.311363
Cttn	0.445441	0.125354
Itfg3; Fam234a	-0.141831	0.361825
Mrps17	0.161748	0.381258
Cltc	0.760649	0.127919
Ufd1l; Ufd1	0.404996	0.654708
Phb2	0.51854	0.165833
Fstl1	0.0462341	0.896839
Tfrc	-0.0236663	0.858672
Ranbp1	0.0911431	0.821825
Pdlim1	0.226018	0.0746561
Pccb	1.74148	0.37407
Mrpl44	0.231954	0.400974
LOC100045999; Ran; LOC102641332	0.545895	0.0378204
Atp5b	0.00290569	0.98833
Mrpl13	0.115189	0.614727
Aldh9a1	0.377231	0.0625974
H2-Ke6	0.40841	0.423204
Serpinh1	0.00829761	0.971044
Hars2	0.510438	0.114904
Msn	0.289495	0.0446734
KRT5	1.0399	0.556007
Eif4g1	0.454044	0.292962
Mgst1	0.0210282	0.757429
Supv3l1	0.42295	0.184033
Mrpl3	0.135021	0.592629
Samm50	0.450389	0.141486
Dlst	0.074935	0.737193
Cdk1	0.168711	0.724307
Psmd13	0.711289	0.346383
Grpel1	0.280202	0.166286
Dhrs13	0.181523	0.431726
Ctsb	-0.0669792	0.758904
Dag1	0.00663749	0.982955
Synj2bp; Gm20498; Synj2bp-cox16	0.311002	0.336437
Psmc1	0.615859	0.339821
Mmp14	0.177227	0.655415
Mrpl39	0.17945	0.291992
Rpl26; Gm15772	0.534779	0.368732
Abce1	0.400908	0.0670635
Atp13a3	0.387189	0.274062
Esyt1	0.858685	0.355403
Actb	0.488142	0.0284469
Dnajc10	0.0255945	0.95358
Galnt7	-0.020245	0.933938
Srpr	0.106198	0.662656
Mcm7	0.0827339	0.654434
Prdx3	0.264002	0.27696
Mrpl15	0.197768	0.297616
Rpl14	0.8536	0.338352
Jup	0.819183	0.664067
Nedd4l	0.012122	0.931647
Nexn	0.2877	0.455845
Oxct1	0.225529	0.261298
Ube2g2	0.00574734	0.987681
Idh3a	0.256889	0.243948
Gaa	0.01048	0.970903
Slc2a1	-0.178814	0.660319
Tkt	0.349142	0.31156
Aldh2	0.349237	0.18103
Psmc4	0.434637	0.353136
Farsb	0.65268	0.339137
Eno1; Gm5506; Eno1b	0.50979	0.146465
Nadk2; Nadkd1	0.245783	0.232751
Gspt1	0.456225	0.321457
Scfd1	0.319618	0.0989024
Gba	-0.00701335	0.983184
Thbs1	0.581743	0.558056
Mcat	0.900686	0.212579
Itgb1	-0.0425838	0.830964
Serpinb6a	0.039511	0.88831
Rpl32; Rpl32p	0.733047	0.232418
Psma6	0.257815	0.249429
Hspd1	0.31858	0.186997
Tpt1	0.702699	0.251079
Rdx	0.338847	0.497454
Nln	0.266102	0.165655
Dpp7	-0.0758606	0.785867
Cat	0.0271965	0.93056
Taco1	0.354367	0.0620002
Grsf1	0.166116	0.325682
Mrpl10	0.249074	0.36298
Ndufb10	0.11623	0.738293
Pcbp2	0.275087	0.249617
Eif5; LOC100047658; LOC102641436	0.558847	0.246651
Hnrnpd	0.169097	0.310581
Ndufb5	0.428214	0.326285
C1qbp	0.511079	0.280978
Pabpc1	0.387862	0.00301999
Tmem65	0.104767	0.774865
Ugdh	0.479186	0.322368
Slc12a4	0.280869	0.198787
Nudt9	-0.268843	0.59519
Atp5j2	0.0704806	0.572927
Hk1	-0.0803441	0.853451
Bckdha	0.38987	0.169619
Ndufab1	0.240873	0.516393
Psme3	0.565339	0.0226652
Cd44	0.238057	0.687641
Tubb5	0.450688	0.189676
Acot2	0.37465	0.208379
Mpp6	-0.0984059	0.641716
Ppia	0.284181	0.536518
Mrpl21	-0.0148155	0.935427
Hibadh	0.508991	0.468528
Rpl17	0.611529	0.271502
Ctnnd1	0.617593	0.281539
Canx	0.0442277	0.824047
Hspa9	0.320137	0.210659
9430016H08Rik; Maip1	-0.07799	0.786025
Mrpl46	0.126609	0.548208
Pcbp1	0.364308	0.290313
Gars	0.417884	0.00462488
Tor1aip2	0.186159	0.706843
Pisd	0.00164884	0.994812
Lamtor2	0.25642	0.191573
Actr2	0.486907	0.173838
F3	-0.425877	0.239933
Dnajc3	0.0537763	0.899521
Map1lc3b	0.384696	0.582058
Cdc123	-0.29856	0.0879247
Acp6	0.24454	0.391626
Rps16-ps2; Rps16	0.578715	0.370032
Tars	0.280266	0.529494
Txnl1	0.556861	0.231117
Rpl30; Rpl30-ps8; Gm12191	0.598679	0.51575
Cs	0.588137	0.187996
Sod2	0.120941	0.50004
Txndc5	-0.0317077	0.865866
Mrps28	0.104393	0.712702
Cfl1	0.276289	0.431471
Cisd2	0.132935	0.58091
Lonp1	0.542619	0.240643
Mrpl14	0.16743	0.313332
KRT6A	1.75726	0.535118
Dnaja3	-0.0105857	0.957632
Ddx3y	-0.84589	0.619814
Tmpo	0.492297	0.360438
Psmd12	0.583626	0.30121
Lepre1; P3h1	-0.0322554	0.919616
Ccdc47	0.20482	0.251306
Yars2	0.340349	0.382646
Pdia6	-0.126688	0.238919
Rpl36	1.95479	0.162081
Mif	0.423477	0.0867635
Bgn	-0.00316362	0.992822
Nars	0.443999	0.375553
Stom	0.315344	0.382116
Uqcrfs1	0.179536	0.653027
Itga5	0.00525104	0.972755
Anxa3	0.311752	0.0462418
Fam129b	0.70216	0.491684
Tpi1	0.297838	0.153123
Snrpa1	0.0564682	0.729087
Ap1b1	1.53068	0.371579
Mocs1	0.082506	0.822458
Mrps11	0.132386	0.601355
Esd	0.123591	0.639268
Gnb1	1.02109	0.445728
Nmt1	0.195951	0.551319
Hnrnpa2b1	0.347832	0.283775
Rpl27a	0.64934	0.161513
Thbs2	0.289026	0.534851
Capza1	0.205381	0.699629
Chmp6	0.0728852	0.797457
Atp5e	0.24677	0.757756
Ndufv2	0.317747	0.207184
Gns	0.0421329	0.917913
Etfb	0.161923	0.477944
Mrpl19	0.110256	0.668161
Emc8	0.363951	0.228835
Cct4	0.204889	0.434553
Dld	0.211194	0.260646
D10Wsu52e; Rtcb	-0.0639682	0.69649
Arhgap23	0.73304	0.440143
Prep	0.282084	0.495507
Hdhd3	0.308571	0.494697
Disc1	0.707363	0.0678772
Cox5b	-0.0257578	0.938298
Ndufa5	0.287158	0.184174
Arcn1	0.322381	0.105287
Tmed5	0.0866146	0.67969
Psma4	0.514192	0.490169
Hnrnpa1	0.504546	0.318937
Ikbkap	-0.235521	0.726978
H2-D1	-0.153827	0.32354
Hspe1	0.35244	0.0603658
Fkbp3	0.293614	0.337494
Acot13	0.278706	0.279882
Hnrnpab	0.0052067	0.971929
Rab22a	-0.0515905	0.733851
Mrps35	0.265989	0.418641
D17Wsu104e; Mydgf	-0.626069	0.0781733
Atp6v1b2	0.372696	0.208221
D10Jhu81e; LOC100046684; LOC102641949	0.252087	0.248177
Rps14	0.467272	0.453537
Hacl1	0.953504	0.571783
Lamtor1	0.0464109	0.815096
Vim	0.197048	0.608288
Cycs; Gm10053	0.133131	0.565484
Picalm	0.385132	0.623968
Hyou1	-0.185839	0.406264
Dnaja2	0.386254	0.309377
Erlec1	0.304592	0.653062
Mrps5	0.284131	0.510947
Emc2	0.240474	0.574109
44081	0.05252	0.89925
Rbbp4	1.60538	0.332523
Rpl23; LOC100044627; LOC100862455	0.411856	0.323819
Ctsl	0.195903	0.486162
Caprin1	1.79466	0.28321
Pdha1	0.182776	0.309864
Pkm	0.410013	0.171552
Pacsin2	0.330674	0.183764
Dap3	0.421784	0.287026
Mrpl55	-0.184693	0.387079
Golph3	-0.0256829	0.754029
Ncl	0.429825	0.0933936
Rpl10; Rpl10-ps1	0.713747	0.290463
Cct5	0.355266	0.293051
Aldh5a1	0.124585	0.616546
Il1rl1	-0.0139662	0.942192
Ak2	0.321351	0.0432555
Gm3244; Ndufb4; Gm3873	0.264948	0.384853
Atp6v1a	0.361962	0.142712
Rpl13	0.614652	0.412112
Mrpl11	0.121391	0.659728
Psmd1	0.383702	0.426221
Mta2	0.515669	0.180414
Psma7	0.0721481	0.610096
Mesdc2; Mesd	-0.274332	0.336306
Lman1	0.109344	0.513494
Pdhx	0.353829	0.209947
Iqgap1	0.410129	0.158392
Mrpl12	0.134285	0.372416
Mrpl43	-0.00942854	0.958325
Glipr2	0.326245	0.446561
Akr1b3	0.122001	0.0146884
Fam63a; Mindy1	0.337591	0.54456
Arpc5	0.47947	0.351861
Mecr	-0.0285766	0.967093
Aldh18a1	0.440128	0.0449702
Mrpl9	0.24708	0.405851
Dlat	0.527873	0.362766
Psmb7	0.22951	0.459141
Hspa4	0.130947	0.34242
Hcfc1	-0.568905	0.299675
Dnajb11	-0.141936	0.480831
Ldlr	0.187328	0.649983
Nov	0.56501	0.0651651
Gnb2l1; Rack1	0.553751	0.186978
Rbm39	0.476331	0.0152808
Cops8	0.412311	0.169541
Hspa5	-0.0515084	0.68324
Ptgfrn	-0.054787	0.869739
Mrps22	0.154334	0.588298
Immt	1.25747	0.290355
BC003331	0.757275	0.385849
AI481877	-0.312339	0.0152005
Rps7	0.471748	0.224305
Hnrnpul1	0.401203	0.216339
Acly	0.655933	0.131833
Eral1	0.359341	0.128411
Tom1	0.186005	0.280747
Asah1	-0.145213	0.556825
Cct3	0.371613	0.271017
Rps26; Rps26-ps1	0.651136	0.16164
Rpsa; LOC100045332; LOC100505031; LOC102642689	0.729146	0.25374
44083	0.236354	0.158902
Itgav	-0.045018	0.910511
Rps17	0.524111	0.356046
Rps11	0.556384	0.333032
Idh3g	0.403008	0.114011
Fkbp9	-0.310952	0.158143
Ap3d1	0.783429	0.402812
Ddx5	0.831247	0.181877
Gusb	-0.00471935	0.991831
Rpl4	0.477087	0.49876
Apool	0.0159597	0.948469
Rps13; Rps13-ps1; LOC102642137	0.640256	0.407829
Fscn1	0.59696	0.282663
Camk2d	-0.00353376	0.991753
Ptrh1	0.235158	0.435253
Uchl5	-0.122362	0.624764
Pa2g4	0.270295	0.466457
Ckap4	0.312043	0.311649
Gsr	0.202951	0.423663
Fkbp11	-0.295961	0.322275
Tcea1	-0.345933	0.173613
Mrpl20	0.016536	0.911566
Hmgcl	0.10361	0.853315
Ak3	0.289813	0.274264
Eef1a1; LOC101056619	0.451041	0.281065
Rps24; LOC677113; LOC102642752	0.505775	0.412021
Thbd	0.37119	0.0166285
Slit2	0.419316	0.145161
Ict1; Mrpl58	-0.153208	0.625345
Stip1	0.169986	0.158284
Rps9	0.51228	0.492019
P4hb	0.0505953	0.79236
Cpox	0.0628068	0.766617
Psma1	0.406648	0.374595
Hnrnpu	0.574555	0.404003
Strap	-0.00555278	0.988746
Vps29	0.232513	0.146486
Abcf2	1.86811	0.258401
Ftl1	0.237711	0.750706
Pdia4	-0.228	0.105034
Xpnpep3	0.585879	0.00643646
Atp5d	0.502495	0.501796
Mthfd2	0.245306	0.37333
Mrps9	0.175066	0.549023
Txndc12	-0.267196	0.240133
Fkbp2	-0.154986	0.22387
Fbln2	-0.297018	0.0964893
Actn1	0.502823	0.172529
Nme2	0.259297	0.366579
Lamc1	-0.202007	0.274719
Snx9	-0.0262146	0.934218
Rpl34-ps1; Rpl34; Gm4705	0.571118	0.29322
G3bp1	-0.00617277	0.97346
Mat2a	0.341565	0.162402
Ssb	0.165032	0.359613
Uqcrq	0.118212	0.731651
Lamp1	0.184774	0.711125
Pdia3	-0.123693	0.623483
Pafah1b1	0.273779	0.590035
Ikbip	-0.0537804	0.763442
Mrpl47	-0.0537553	0.731202
Cyb5; Cyb5a	-0.00877883	0.973828
Mrpl27; Gm6304	-0.163102	0.443562
Mia3	0.441136	0.202639
Hspa13	0.396079	0.205758
Golga5	0.0216206	0.949432
Rpl27; LOC108167922	0.52378	0.273357
KRT14	1.09523	0.657966
Hnrnpk	0.438999	0.027515
Ikbip	0.37115	0.646284
Tial1	-0.202845	0.751692
Fads2	-0.226467	0.218739
Ctsz	-0.0635323	0.811879
Tmed9	0.205803	0.610998
Mrpl38	0.0545485	0.789658
Lrp1b	0.257665	0.290156
Sdcbp	0.340832	0.250455
Hmgb1; Gm21596; LOC100862258	0.204698	0.448712
Pcca	0.255739	0.287912
Snrpd1	0.0642785	0.665024
Dlg1	0.286734	0.269267
Mapk15	-0.382731	0.200576
Rpl10a	0.679656	0.413027
Clta	0.00538572	0.979728
Hnrnpa3	0.158551	0.095656
Rps18	0.450505	0.524325
Mrpl2	0.255741	0.427551
Timp1	-0.089037	0.764
Calr	-0.0622636	0.458564
Ubxn4	-0.0755524	0.721625
Psmb1	0.521299	0.024002
Mrpl22	0.0740524	0.802169
H3f3a; H3f3b	0.216214	0.873412
Rpl22; LOC100047372; LOC100504863; LOC102642602	0.614647	0.421256
Aldh7a1	0.264228	0.00140111
Mrps15	0.026335	0.798542
Mccc1	0.249623	0.169969
Ppif	0.348094	0.30833
Rps3a; Rps3a1	0.667214	0.207816
Mrps16	0.0364649	0.840075
Lamb1	-0.057241	0.771325
F5	0.37367	0.437937
Rpn1	0.0433271	0.77644
Pcx	0.548225	0.282376
Dsp	1.34452	0.50531
Prkcsh	-0.220006	0.48553
Cacybp	-0.221055	0.572092
Marcks	-0.283242	0.295797
B2m	-0.167374	0.404966
Clint1	0.525009	0.329893
Rexo2	0.469925	0.296653
ALB	0.056917	0.818641
Arpc3	0.539403	0.0603167
Serbp1	0.195568	0.453387
Tbc1d8b	0.364499	0.406328
Mrps31	0.20688	0.585198
Impg1	0.286418	0.124974
Hgs	0.353174	0.554129
Ewsr1	0.0568435	0.603601
Syncrip	0.256892	0.15135
Rpl38; Rpl38-ps1; Rpl38-ps2	0.144121	0.313822
Col1a2	-0.195454	0.58116
Rpl23a	0.503303	0.263666
Mrpl45	0.118012	0.615583
Lmna	0.517472	0.632013
Mrps21	-0.298114	0.104087
Khdrbs1	0.585656	0.277608
Nucb2	-0.375384	0.222356
Rps10	0.3796	0.590142
Stxbp3a; Stxbp3	-0.23308	0.611542
Hist4h4; Hist1h4a; Hist1h4k; Hist1h4c; Hist1h4i; Hist1h4n; Hist1h4h; Hist1h4f; Hist1h4j; Hist1h4b; Hist1h4m; Hist1h4d; Hist2h4; LOC100862646; LOC102641229	-0.275511	0.911854
Alcam	-0.194989	0.408357
Dnajc11	0.709725	0.133871
Rcn3	-0.152308	0.570568
Gapdh; Gm20899; LOC100042025; Gapdh-ps15; Gm12033	0.287819	0.507117
Cisd1	-0.465257	0.110694
Uqcrb	0.0674826	0.823086
Tmem2	0.25571	0.338714
Macrod1	0.759983	0.463651
Rpl24	0.243504	0.607128
Tor1aip1	-0.288255	0.210577
Ndufs5; BC002163; LOC100504968; LOC102641315	0.160489	0.817012
Glg1	-0.433352	0.0782824
Prdx6	0.0509748	0.940558
Slc31a1	-0.112887	0.79075
Snrpd2	-0.122015	0.511194
Atp6v1e1	0.421577	0.259043
Rcn1	-0.104054	0.779568
Fth1	0.579484	0.370861
KRT17	2.22299	0.595337
Lgmn	-0.627479	0.215979
Pitrm1	0.200961	0.259155
Ola1	0.149153	0.663508
Mrps6	-0.018133	0.775521
Lgals1	0.208747	0.505537
Rpl39	-0.189908	0.52616
Set	0.563197	0.218887
Pdp1	0.165624	0.830115
Pigs	-0.368258	0.600417
Sparc	-0.138661	0.715242
Mrpl35	-0.136224	0.580599
Timm9	-0.17422	0.321623
Mrps34	0.235465	0.729283
Gna13	-0.405959	0.193471
F2	-0.304543	0.0115125
Cox6b1	0.322849	0.247223
Hspa4l	-0.156367	0.694897
Mrpl1	0.196249	0.716799
Calu	-0.295101	0.329548
Trmt10c	0.200846	0.425943
Uqcrh	-0.10525	0.668108
Cst3	-0.455893	0.125015
Atp5j	0.0373515	0.92228
Fau	0.0661346	0.842263
Calm3; Calm1; Calm2	0.111338	0.72819
Rpl35	0.465653	0.186295
Nid1	-0.244262	0.268455
Clcc1	-0.349792	0.153306
Mrpl34	0.159102	0.39387
Ndufa8	-0.0638364	0.852235
BC031353; Fam214a	0.187889	0.416896
Mtdh	-0.157649	0.49054
Mrpl32	-0.202936	0.376351
Hmox1	0.19411	0.775743
Tpm2	0.373242	0.312908
Mrps7	-0.0833213	0.66876
Slirp	0.492	0.376465
Iqsec3	0.392416	0.0533329
Rcn2	0.346158	0.628559
Hk2	-0.103687	0.776548
KRT1	1.08883	0.580033
Ctsa	-0.539053	0.0576565
Naca	-0.0230544	0.977037
Mrpl51	0.250179	0.659125
Gpnmb	0.359226	0.592603
Tmem209	0.036858	0.888278
Mrps33	-0.0284856	0.820779
Fn1	0.0129542	0.862531
Lin7b	-0.363275	0.534076
D10Bwg1379e; Arfgef3	0.178507	0.668092
Rps15	0.0968568	0.782187
Lamp2	-0.249976	0.132019
Copz1	-0.377064	0.491678
Hist1h1b	0.333456	0.363998
Pzp	0.586331	0.672089
Alyref	-0.298023	0.484166
Hist1h2bb	0.354365	0.757097
L2hgdh	-0.15047	0.794784
KRT2	0.785397	0.62959
Hist1h1c	0.360965	0.274176
Ssr4	-0.718617	0.0686631
Rpl31	0.422849	0.390641
Fus	-0.254805	0.372385
Rpl22l1	-0.0185835	0.964568
Eif2s2	0.0221343	0.957824
Hist2h2ac	-0.76489	0.763294
Ptrf; Cavin1	-0.236159	0.551432
Tmem120a	0.650792	0.400711
Sdpr; Cavin2	0.605494	0.466487
Slc25a46	0.559415	0.232057
Klb	-0.303466	0.0852779
Sub1	-0.0134117	0.983314
Rbx1	-0.473947	0.363107
Hdgf	-0.0656143	0.836375
Cd34	-0.822832	0.270906
KRT9	0.408645	0.34456
Csda; Ybx3	-0.66497	0.160655
Ybx1	-0.660442	0.133369
Gm10177; Sec61g; Gm11575; LOC102637269; Gm4184	-2.58996	0.229865
Stk4	-0.547165	0.255258
Hat1	-0.556358	0.481016
Hmgb2	-1.45826	0.286679
Krt76	-0.376339	0.71771
Vasn	-0.758309	0.389492

## Sheet: Fig_S2A
Gene_Symbol	log2_fold_change	p_val
Tnks1bp1	2.97362	0.0251797
Efha1; Micu2	2.25361	0.172222
Ginm1	3.13683	0.0647019
Tmub2	3.01439	0.148682
Slc25a19	3.26544	0.0727707
Dpy19l4	4.4373	0.0221219
Slco3a1	4.14509	0.0422208
Tubb2a	4.04362	0.0628274
Fam114a1	2.44426	0.0348601
Fn1	2.91479	0.0341943
Tspan4	4.57752	0.000421075
Tceb2; Elob	3.53949	0.0122301
Tmem62	4.4164	0.0491329
Lipa	2.99797	0.325672
Prkcb	4.11759	0.0795106
Macrod1	3.46534	0.0749009
Atp6v1e1	5.38212	0.10422
Bnip1	3.96338	0.0500491
Pik3ip1	3.4294	0.217835
Ndufa2	4.92612	0.0404673
F2r	4.13489	0.0194834
Slc39a13	4.38579	0.0323022
Bcs1l	4.71566	0.162879
Ipo4	3.1049	0.1376
Mgat5	2.69374	0.104155
Bace1	2.08006	0.261812
Pafah1b3	3.28196	0.102914
Lta4h	2.76252	0.22193
Usp30	2.87853	0.17127
Zdhhc3	2.90425	0.201206
Atp11c	4.80377	0.0352949
Spr	3.1139	0.123896
Slc36a1	2.91342	0.200034
Abhd5	2.55023	0.046224
Ubtd1	3.40857	0.0582095
1810037I17Rik	7.86932	0.0925411
Eif2b2	2.3277	0.249339
Trmt10c	2.04811	0.108795
Icmt	4.50372	0.0505478
Ggta1	3.26243	0.116831
Tmem208	3.47198	0.0282743
Cd47	2.28789	0.148668
Gm12942; Tmem35b	3.91036	0.0820774
Cyp2d11	3.03758	0.0366177
Caprin1	2.69604	0.00847346
Cyp2j6	3.96559	0.0338041
Osbpl8	2.63192	0.192834
Tmem189	3.64498	0.170024
Tsen15	2.38793	0.110419
Memo1	3.91007	0.0518902
Ctsz	3.32006	0.0630512
Gpd1l	2.61131	0.0593417
Reck	2.81525	0.0171624
Dnajc7	2.37775	0.0317026
Mars2	3.62747	0.13741
Sdhaf2	2.40579	0.0228835
Vasp	1.81135	0.0855067
Ap2s1	3.19429	0.0564811
5730469M10Rik; Fam213a	3.9683	0.064536
Higd2a	5.16024	0.0524487
Hp1bp3	3.16737	0.0368087
Srp14; LOC100504988; LOC102642637	2.78847	0.296221
2510039O18Rik	3.03043	0.00934512
Cmtm7	3.4795	0.024232
Rbx1	3.46964	0.0461747
Tmem104	5.44221	0.0491842
Slc9a8	5.8522	0.0185572
Abcc10	2.89167	0.0560657
Epb4.1l1; Epb41l1	2.53659	0.141182
Iars	3.0028	0.0711655
Trex1	3.93749	0.0214504
Uba2	2.73609	0.0919879
Mvk	2.14511	0.0555183
Mfsd8	2.51427	0.236491
Rbm39	3.11625	0.152369
Ubqln2	2.72149	0.0785888
Mpv17	3.09599	0.0382988
Gramd4	3.8706	0.0511465
Mgat1	1.19313	0.384627
Cdc42se2; LOC101056447	3.18319	0.0070179
Mrps31	3.21773	0.153205
AU040320	2.13481	0.112078
Galnt13	1.4069	0.105024
Eef1d	5.13813	0.00116658
Fastkd5	2.36174	0.210887
Slc41a2	1.67774	0.358823
Pigq	3.56384	0.043239
Slc25a35	2.90763	0.0170601
Slc30a6	2.23725	0.0685264
Cyp2d26	3.0211	0.0748838
BC031181; LOC102641497	4.63096	0.076982
Ccdc22	1.74574	0.0567772
Tmem222	3.58788	0.124457
Tmem238	6.83887	0.0867711
Nrbp1	2.26951	0.0770964
Tmbim4	4.5869	0.0884711
Tmem173	4.11766	0.0152395
P2rx4	3.29862	0.075036
Xpo7	3.23223	0.0944448
Puf60	2.90396	0.0546722
Psen2	2.55141	0.0585832
Fastkd2	2.47051	0.046255
Dhx15	3.64312	0.0706454
Get4	3.73061	0.00838225
Fam198b	2.76488	0.00766762
Cul2	2.65249	0.0214366
Gpr107	6.28031	0.0530276
ATP6	6.55703	0.0109125
Stx18	2.63833	0.243609
Timm10	5.09923	0.0639055
Pigh	2.11112	0.351353
Ndufa3	3.25324	0.195353
Pdlim7	2.82784	0.209914
Pip4k2c	2.31807	0.0705982
Sec23ip	3.48501	0.111278
Pfkl	3.09061	0.0365367
Steap1	3.05644	0.0744802
Gpr180	2.54726	0.0900399
Vezt	2.18399	0.0820211
Slc2a8	3.76873	0.0817019
Isoc2a	4.83755	0.000995535
Entpd5	1.92024	0.199533
Coq9	3.74899	0.12793
Cops5	2.66852	0.00659039
Txnip	3.48732	0.036529
Nenf	4.57299	0.02851
Metap1	3.69969	0.0613617
Alg9	3.14906	0.107407
ND2	2.2708	0.111488
Mvp	3.93165	0.0183552
Vkorc1l1	7.02748	0.0485954
Grik2	3.47269	0.0573971
Zw10	3.85823	0.044672
Tlcd1	3.64193	0.0490251
Tnfrsf12a	3.58051	0.0344272
Stx16	2.44584	0.0482439
Slc35a3	6.104	0.0214378
Tmem97	6.44879	0.0559557
Cav2	6.24801	0.0735168
Plin2	6.22089	0.026735
43896	6.35024	0.0255292
Nrm	6.71522	0.0743945
APOA1	5.71252	0.0186439
Timm17a	5.65388	0.0196727
Cav1	5.59961	0.0537625
Gas1	5.49048	0.0515366
Slc3a2	5.99491	0.0352396
Npc1	5.42973	0.0803284
Ephx1	5.41455	0.00530043
Sgcb	3.93062	0.209077
Nptn	5.31243	0.0301689
Abcb1b	5.30634	0.0448523
Bsg	5.00899	0.0348991
Tspan6	4.99697	0.155119
Mfsd5	4.9888	0.0568618
Laptm4a	4.97371	0.0633833
Slc25a32	4.60608	0.0342708
Cmtm6	4.09927	0.0570192
Fam114a2	4.90691	0.0621474
1110057K04Rik; Ldah	4.90563	0.0291192
Tspan14	4.8525	0.0194029
Mecr	4.85214	0.00137456
Trabd	4.81849	0.211181
Krtcap2	4.74336	0.105818
COX1	4.70966	0.000702689
Atp6v0c; Atp6v0c-ps2	4.68301	0.0358957
Vdac1	4.67629	0.0135355
4732418C07Rik; Efcab14	4.60385	0.028498
Emb	4.60309	0.0188093
Slc6a8	4.59949	0.108191
Kdelr1	5.63424	0.193533
Ankle2	4.58476	0.137753
ND1	4.48307	0.0953686
Golt1b	4.50761	0.12867
2010107H07Rik; Smim4	4.13996	0.0228664
Tmem14c	4.44565	0.139373
Tmem199	4.43716	0.0236341
Trim59	4.43374	0.0739601
Timm22	4.39279	0.0909082
Slc25a20	4.36526	0.02858
Ndufa11	4.35464	0.0152682
1810006K21Rik; Tmem258	4.35353	0.142987
G6pc3	4.35104	0.0588375
Abcg2	4.275	0.108254
Cd9	4.25996	0.0390796
Ap2a1	4.25517	0.191618
Dolpp1	4.24627	0.0670573
Pon3	4.24598	0.0553494
Vdac2	4.24403	0.0202323
Tspo	4.23614	0.0892144
Plp2	4.22671	0.151019
Rbm14	4.22654	0.257814
Endod1	4.21596	0.0246073
Lmbrd1	6.60515	0.212538
Tyw1	4.16615	0.156534
Slc25a15	4.16135	0.0674347
Fdxr	4.12706	0.0634383
Pttg1ip	4.11687	0.0128739
Rab3a	4.83704	0.155527
Timm17b	4.10858	0.0307386
Galnt1	4.10649	0.0346321
Ifitm3	4.09297	0.0215355
Adh5	4.19193	0.0716259
Dolk	4.08076	0.0622859
Galnt4	4.07911	0.0162595
Taldo1	4.05247	0.29885
Ndc1; Tmem48	4.04463	0.0175805
Cd248	4.03171	0.140061
Cd151	4.01123	0.0810551
Pqlc3	3.99602	0.17149
Agpat3	3.99412	0.143647
Plscr3	3.97501	0.0276171
Rbm26	3.71076	0.0605119
Slc12a9	3.95868	0.191862
Tm7sf3	3.95396	0.141972
Tmem87a	3.93118	0.0160563
Pafah2	4.64566	0.168789
Slc11a2	3.9105	0.0248555
Rab2b	3.90654	0.0783222
Bckdhb	3.88564	0.0898856
Tmem63a	3.87997	0.0417109
Enpp1	3.87973	0.0972138
Ndufc2; LOC102641347	3.868	0.0255749
Tomm22	3.85728	0.0241394
Acp2	3.85072	0.045305
Slc25a1	3.84881	0.0174816
Efnb2	3.84871	0.0713415
Tm7sf2	3.84192	0.00138685
Derl2	3.84126	0.180633
Elovl1	3.84076	0.156789
Abcb11	3.83403	0.0316987
Vmp1	3.83182	0.196721
Yes1	3.82953	0.154651
Agtrap	4.87599	0.0598755
Mrps17	3.78253	0.386727
Sptlc2	3.76561	0.0556261
Fam63a; Mindy1	3.76513	0.186534
Elovl5	3.75633	0.234721
Cd63	3.74722	0.0701543
Cd276	3.74254	0.0321155
Fcgrt	3.73425	0.0386482
Slc16a13	3.72466	0.0451807
Tmem167	3.71239	0.0295648
Dnajc5	3.70894	0.0610344
Tmem128	3.69219	0.121642
Tmem165	3.67684	0.00705238
Mrpl11	3.6661	0.110614
Degs1	3.66141	0.0758053
Slc29a3	3.65545	0.00840293
Mgst3	3.65046	0.0665135
Cd81	3.64215	0.0906844
Syngr2	3.6162	0.0406774
ORF61; Tmem259	3.59951	0.00632012
Srd5a3	3.59491	0.0598049
Amacr	3.58855	0.038072
Gpaa1	3.5843	0.0851578
Slc19a2	3.572	0.0948292
Slc25a30	3.5693	0.0547435
Tmem205	3.56572	0.0836325
Sptlc1	3.56516	0.0302767
Ttc39b	3.55436	0.119924
Slc23a2	4.07801	0.143967
CYTB	3.54172	0.162427
Kdsr	3.54149	0.00699231
Usp9x	2.2513	0.330359
Ncstn	3.53349	0.152284
Slc7a1	3.52213	0.108027
Lamtor3; Gm5900	3.51495	0.0834842
Fzd7	4.19183	0.0533874
Zdhhc13	3.51153	0.070366
Sccpdh	3.50671	0.0487192
Gprc5a	3.50183	0.0268492
U2af2	3.50156	0.0114953
Ostc	3.50013	0.0729028
Clec2d	3.4976	0.0357441
Akap1	3.49003	0.306991
Cers2; Lass2	3.48907	0.0534267
Gja1	3.4756	0.194498
Lpar1	3.47501	0.0143451
Hs2st1	3.25247	0.0273526
Tspan9	3.46892	0.0310846
Tmem206	3.46704	0.0450039
Clptm1	3.46661	0.00303886
Mavs	3.46493	0.34091
Slc35b1	3.46261	0.131296
1810027O10Rik; Tmem256	3.45826	0.0559951
Scamp2	5.3622	0.192057
Pex3	3.44566	0.192868
Wls	3.44548	0.00406357
Txndc15	3.43346	0.157252
Slc33a1	3.43184	0.0517007
Cdipt	3.42705	0.111539
Saysd1	3.42566	0.17811
Qsox2	3.42438	0.116541
Lpcat3	3.41915	0.0335031
Tmem50a	3.40976	0.0507146
Lmbrd2	3.3976	0.0883523
Pign	3.39588	0.0533723
Eci2	3.39195	0.0783479
Ncs1	3.48597	0.0146635
Smad1	3.4695	0.152548
Spcs2	3.38902	0.0930349
Akr7a5	3.58633	0.360608
Slco2a1	3.37255	0.053757
Spcs1	3.37087	0.136355
Cln8	3.36726	0.0245187
Mboat7	3.36523	0.00851203
Pex5	2.31846	0.0327334
Ndufb11	3.35469	0.0609381
Rab43	3.35367	0.0884856
Rtn3	3.35364	0.012309
Mtch2	3.35348	0.0648198
Pcolce	2.14412	0.328218
Lman2l	3.35049	0.0218547
Chst14	3.34193	0.0510351
Emc4	3.33993	0.148776
Pld3	3.08401	0.119701
Acsf3	3.33421	0.0849576
Syvn1	3.33186	0.00224773
Slc39a11	3.33016	0.244819
Tmem11	3.32656	0.0484828
Thbd	3.31806	0.0215153
Scarb1	3.30758	0.00669612
Nsdhl	3.30676	0.000392519
Ufsp2	3.29964	0.0896206
Cyb561d2	3.29762	0.0106817
Pigu	3.29234	0.0824849
Slc44a2	3.29174	0.000581489
Tmbim6	3.28422	0.0538094
Slc38a7	3.28277	0.0100317
Atp13a1	3.27913	0.0358313
Lhfpl2	3.27509	0.11629
Parl	3.26585	0.0248263
Gyk; Gk	3.25523	0.0905459
Tmem209	3.24911	0.0645418
4930471M23Rik; Slc35f6	3.24554	0.0589055
Flvcr1; Mfsd7b	3.23711	0.0997189
Vkorc1	3.23323	0.0952998
Fam3c	3.22122	0.0661219
Tagln2	3.21647	0.0381142
Sdhc	3.21348	0.0559883
Mpdu1	3.208	0.0750716
Entpd7	3.20705	0.0121917
Cnih4	3.2067	0.125239
Rab35	3.20311	0.0961341
Tmem115	3.19946	0.0487895
Plaur	2.70527	0.128043
Tmed3	3.19904	0.033679
Clcn5	3.19728	0.0724685
Cyb5b	3.19574	0.0536138
Atp6v0a2	3.19174	0.0137786
Gpr124; Adgra3; Adgra2	3.19131	0.0551371
Lpcat4	3.1911	0.0428701
Acox1	3.18087	0.0295969
Pigx	3.96366	0.180897
Usmg5; LOC100504912; LOC102642507	3.17678	0.0794382
Procr	3.17147	0.0312285
Slc44a1	3.17067	0.0576068
Letm1	3.16622	0.0718787
Ece1	3.16432	0.0533359
Mospd2	3.16186	0.0758783
Dennd4c	3.15723	0.13305
Vma21	3.15606	0.0428083
Tm9sf4	3.15569	0.0127748
Slc29a1	4.55462	0.228279
Alg11	3.14518	0.0726266
Serinc3	3.14462	0.00699012
ND3	3.14418	0.0426455
Ipo5	3.1441	0.0442416
Ccdc109b; Mcub	3.14257	0.181539
LOC101056446; H2-D1; LOC102641613	3.14093	0.0320122
Arl8a	4.54326	0.0918405
Tm9sf3	3.13847	0.0227216
Spryd7	3.13683	0.0592619
Reep5	3.13226	0.0732734
Surf4	3.13098	0.00578556
Cldn25; Cldnd1	3.12121	0.0447845
Ndufb8	3.11441	0.00992663
8430419L09Rik; Fam234b	2.724	0.0620369
Zfpl1	3.10751	0.0652829
Arfrp1	3.10066	0.0100922
Bri3bp	3.09822	0.00221627
Rnmt	3.09697	0.153546
Naa10	3.09428	0.0712465
M6pr	3.09319	0.0667
Nedd4l	3.09248	0.0451773
Steap2	3.09049	0.0584859
Romo1	3.08893	0.0528031
Tmem87b	4.35115	0.147637
Opa3	3.0848	0.0259253
Nqo1	3.07777	0.0899202
Mgst2	3.07576	0.0633354
Slc2a6	3.0728	0.0227741
Ech1	3.06404	0.0157588
Slc5a3	3.06238	0.0656977
Zmpste24	3.06017	0.00826274
Kpna6	3.38714	0.0748716
Tmem192	3.11676	0.0534849
Fitm2	3.04782	0.0192007
Gsk3b	3.04543	0.0248495
Camk2b	3.0427	0.193596
Clcn7	3.0369	0.0824608
Gpr108	3.02383	0.0911957
Pvrl2; Nectin2	3.02237	0.108767
Fundc2	3.01763	0.051547
ND4	3.01644	0.0783418
Slc38a1	3.01621	0.0613266
Pon2	3.01085	0.0326669
Rnf13	3.0092	0.0302458
S100a10	3.00899	0.0220621
1110001A16Rik; Cebpzos	3.05863	0.155871
Dad1	3.00589	0.0447406
Hic2	3.00074	0.0400032
Golm1	2.99251	0.160631
Mrc2	2.99174	0.0732959
Dlk1	2.99155	0.043745
Tmem119	2.99151	0.084122
Rabac1	2.99146	0.0530321
Ghitm	2.99133	0.0821426
Scamp1	2.99063	0.0148843
Dhrs7b	2.99061	0.0574053
Yipf4	2.98943	0.126105
Tmem19	2.98752	0.0998741
BC017158	2.98548	0.093361
Tm9sf1	2.98351	0.0509397
Cds2	2.98088	0.0334432
Agpat4	4.45707	0.16677
Sppl2a	2.9806	0.00686072
1110008F13Rik	2.97922	0.0920596
Msh2	2.97337	0.176262
Hax1	2.96762	0.142284
Scarb2	2.96556	0.016894
Tm9sf2	2.96362	0.0076328
Agpat1	2.95966	0.0140826
Arl6ip5	2.95776	0.0576846
Atxn10	3.21133	0.105117
BC017643	2.95538	0.0768785
Cmtm3	4.11965	0.122796
Tmem161a	2.95455	0.0308391
Ccdc134	2.95357	0.156675
Timm23	2.95101	0.0835449
Stt3a	2.9498	0.0412839
Slc12a7	2.94488	0.0374243
Slc15a4	2.94389	0.268986
Ank	2.9347	0.0551244
Cers6; Lass6	4.33792	0.0493816
Gosr2	2.92577	0.055269
Slc38a2	2.92283	0.00251476
Hpcal1	2.91995	0.0224518
Capg	2.91829	0.131689
Scamp4	2.91662	0.0433445
Itprip	2.91567	0.00721013
Slc27a4	2.91342	0.0508543
Colec12	2.91191	0.0390041
Cox15	2.90752	0.0078791
Cox20; Fam36a	2.90619	0.0192316
Dnpep	2.90415	0.136277
Preb	2.90132	0.0478551
Tmem120a	2.89967	0.0619884
Dnajc11	2.89814	0.0991722
Slc1a3	2.89618	0.0974993
Slc22a23	2.89511	0.118097
Fdft1	2.89382	0.0334056
Rab14	2.89324	0.0593367
Vasn	2.89304	0.0689791
Slc7a6	2.89054	0.103353
Tmem33	2.88745	0.00463952
Lpcat1	2.88105	0.00854418
Arpc1b	2.87851	0.0210158
Derl1	2.87519	0.0641365
Spns1	2.87283	0.0509836
Rragc	2.86943	0.230904
Gde1	2.86856	0.0151965
0610031J06Rik; Glmp	2.86717	0.153206
Dnajc1	2.86702	0.104349
Fam162a	2.86668	0.0581509
Hmox2	2.86303	0.0106693
Slc35a2	2.86204	0.0592378
Praf2	2.86076	0.131031
Zdhhc20	2.85856	0.0714287
Slc39a14	2.85555	0.00249171
Slc35b2	2.85453	0.0601515
Tmem129	2.8535	0.0532617
Tmem59	2.85318	0.0734421
Tmem2	2.84933	0.131471
Tor2a	2.84929	0.0261271
Hsdl1	2.84886	0.0263034
Lmf2	2.84328	0.0648277
Mrps18b	2.84155	0.265874
Retsat	2.83427	0.0601599
Eva1b; Fam176b	2.83068	0.0158025
Tmem168	2.82817	0.0130437
Ipo7	2.82325	0.158126
Nudt16l1	2.82192	0.119144
Tmem55a	2.82154	0.0950474
Pcyox1	2.81886	0.0435498
Adam9	2.81835	0.0977955
Ppap2b; Plpp3	2.81657	0.00902563
Sdcbp	2.81615	0.026085
Rab22a	2.81604	0.234088
Cab39	2.81495	0.0591884
Igsf8	2.81482	0.294457
Pdzd8	2.81269	0.172195
Dhrs13	2.81115	0.0302719
Srprb	2.81104	0.0300027
Lamtor1	2.81016	0.0543899
Vamp3	2.80975	0.0340519
Slc6a6	2.80937	0.0487958
Fgfr1	2.80599	0.114944
Abhd16a	2.80543	0.081363
Tecr	2.80535	0.00636114
Bcap31	2.80452	0.15792
Pear1	2.80226	0.132473
Epha2	2.80114	0.0538983
Dhcr24	2.80049	0.0137177
Ggcx	2.79765	0.0321957
Prkaa1	2.84225	0.156448
Bcap29	2.79454	0.148509
Cisd2	2.79403	0.0417005
Ube2g2	4.03763	0.188369
Lpgat1	2.78949	0.0876045
Golim4	2.78773	0.00510552
Tmx4	2.78762	0.0365106
Sh3gl2	2.03963	0.100552
Slc25a22	2.78639	0.00399431
Flot2	2.78582	0.0126787
H13	2.78089	0.0101389
S100a4	2.78053	0.124632
Pofut1	2.78052	0.0280895
Tmem106a	2.77982	0.0215231
Ssr1	2.77756	0.0364788
Slc1a4	2.7749	0.0512098
Abhd17b; Fam108b	2.77254	0.0699095
Stx8	2.76865	0.035454
Hsd17b12	2.76857	0.0768035
Aacs	3.46964	0.237128
Vps13c	2.76839	0.194361
Sar1a	2.7644	0.2392
Slc25a17	2.76421	0.071128
Rab6a	2.76319	0.0345041
Mxra7	2.76143	0.133371
Nceh1	2.75847	0.0155363
Ak1	2.7579	0.142549
Rab30	2.75747	0.00192154
Yif1a	2.75655	0.000232895
B4galt1	2.75613	0.0235626
Tmem126a	3.75561	0.215179
Elac2	2.7517	0.155331
Smpd2	2.74843	0.000457297
Rdh14	2.74818	0.060153
Dhcr7	2.74717	0.0137546
Tnfrsf1a	2.74678	0.101306
Sypl	2.74574	0.0228052
Ppt1	2.7457	0.0479436
COX2	2.74279	0.103174
Tom1	2.7408	0.00127875
Slc30a7	2.74005	0.0284717
Hiatl1; Mfsd14b	2.73775	0.203228
Tmem160	2.73556	0.0103161
Cers5; Lass5	2.73497	0.129957
Soat1	2.73414	0.0143626
Wdr5	3.09323	0.0297139
Serinc1	2.73165	0.0766957
Higd1a	2.72852	0.0859781
Mrps11	2.7278	0.0988376
Steap3	2.72643	0.0460082
Pcyox1l	2.72629	0.106111
Itm2c	2.72591	0.0238676
Sidt2	2.72448	0.199375
Edem3	2.72372	0.0409306
Dhrs1	2.72364	0.0253348
Sar1b	2.72353	0.104305
Ppox	2.71765	0.124716
Dnajb12	2.71758	0.143855
Nradd	2.71756	0.140691
Glb1	3.81695	0.225728
Cyp51	2.71668	0.00917729
Arl1	2.71478	0.121509
Slc39a7	2.71427	0.187982
Tbl2	2.71295	0.187576
Apmap	2.71208	0.0441924
Fads3	2.7104	0.112287
Sec61a2	2.70973	0.0240017
Ufl1	2.70668	0.0973666
Agk	2.70618	0.00108339
Ankrd46	2.70484	0.0500098
Nipa1	2.70458	0.0201927
Arxes1; Arxes2	2.70384	0.0323904
Aaas	2.70364	0.00262123
Lrig1	2.7009	0.0834448
Bak1	2.69815	0.0132934
Tmem175	2.6977	0.158293
Sfxn5	2.69748	0.0186078
Scpep1	2.69655	0.138366
Atp6v0d1	2.69297	0.0635964
Rpa1	2.69278	0.312434
Brox	2.68875	0.00470692
Cstb	2.68833	0.00226286
Grb10	2.68787	0.116902
Aqp1	2.68705	0.0178916
Rab4b	2.68679	0.0451365
Slc35b4	2.68674	0.205401
Yipf3	2.68391	0.117111
Gas2	2.68368	0.0834457
Wdfy1	2.68278	0.199775
Dhodh	2.68104	0.068642
Rdh10	2.68064	0.173668
Mlec	2.6802	0.00951193
Tnfrsf10b	2.68018	0.101877
Nt5c3	2.67855	0.00118244
Calcrl	3.57107	0.108353
Mpp1	2.67687	0.0186397
Erbb2ip; Erbin	2.67686	0.00103267
Lypla1	2.67528	0.0886099
Adck1	2.67388	0.0214837
Prcp	2.67362	0.0192178
Ube2d3	2.67267	0.0217217
Ppp2ca	2.66976	0.0448596
Tmx1	2.66956	0.018442
Tmem55b	2.66712	0.0354928
Rtn4	2.66628	0.0505772
Atp6ap1	2.66545	0.0504536
Agpat6; Gpat4	2.66544	0.0811549
D17H6S53E	4.46308	0.222906
Ier3ip1	2.66232	0.0333379
Ola1	2.66113	0.250647
Tollip	2.65629	0.157665
Sc4mol; Msmo1	2.65567	0.0243872
Apoo	2.65385	0.00782378
Ilvbl	2.65326	0.0111604
Alg2	2.65094	0.0349108
Gnaq	2.65019	0.0464825
Nucb1	2.64989	0.012812
Tapbpl	2.64749	0.076798
Bag6	2.64611	0.218226
Acbd5	2.64342	0.0855254
Hsd3b7	2.64078	0.0147884
Abcc1	2.63976	0.00571946
Tmem30a	2.63935	0.0350338
Il1rl1	2.63842	0.120224
Slc1a5	2.63831	0.0520343
Rnf145	2.63795	0.0800623
Man1a	2.63594	0.073159
Rab3c	2.63472	0.0826274
Pepd	1.34295	0.43255
Armc10	2.6334	0.0373989
Man1a2	2.63118	0.0487422
Cant1	2.6287	0.138306
Psap	2.62739	0.0109481
Gstm1	4.4229	0.207025
Slc3a2	2.62426	0.0469339
Rraga	2.62346	0.118175
Gaa	2.6225	0.114404
Zdhhc6	2.62151	0.0513386
Tmed1	2.62146	0.205148
Rap2b	2.6199	0.0806012
Arf6	2.61543	0.0383235
Atrnl1	2.35815	0.24692
Rer1	2.61447	0.0291991
Pds5a	2.61353	0.144228
Fads1	2.61341	0.0447797
Cyp39a1	4.4285	0.175802
Tmem106b	2.61094	0.0905401
Psen1	2.6103	0.083789
Dhrsx	2.60919	0.0565905
Tmpo	2.60891	0.00134212
Mtch1	2.60735	0.122948
Ephb2	2.60719	0.025312
Uqcr11	2.6049	0.0643356
Rab34	2.603	0.0119267
Por	2.60207	0.0256397
Tmx2	2.60042	0.0298628
Rab7	2.59975	0.0738244
Vamp8	2.59947	0.0771923
Atp6ap2	2.59835	0.0211753
Pigb	2.59702	0.11829
Ormdl3	2.59528	0.167187
Hnrnpm	2.59471	0.031068
Slc38a9	3.26357	0.0522456
Scamp3	2.59132	0.0333011
Nfu1	2.59121	0.324732
Crlf1	1.39806	0.625271
Pitpnb	2.59056	0.0909994
Ero1l	2.59	0.188051
Scfd1	2.59	0.0227158
Ttyh2	2.58927	0.00989673
1810026J23Rik; Timm29	2.58913	0.341322
Mfge8	2.58852	0.00374529
Ociad1	2.58815	0.0358071
Ebp	2.58765	0.0641505
Pi4k2a	2.58732	0.00385223
Smpd4	2.58625	0.0923755
Ndufb9	2.58593	0.0373017
Hspa13	2.58281	0.0746563
Uqcrq	2.58075	0.0413442
Dnajc3	2.57819	0.173485
43895	2.57806	0.137923
Cpt2	2.57691	0.0194195
Ackr3; Cxcr7	2.57511	0.0889215
Wfs1	2.57481	0.0888187
Ano6	2.57438	0.0509353
Spcs3	2.57244	0.0996963
Ctsd	2.57241	0.124348
Erh	2.57228	0.0882786
Vdac3	2.5713	0.0092328
Rhog	2.56965	0.00551703
Sqle	2.56961	0.0209468
H2-D1	2.56721	0.0421221
Fads2	2.56135	0.0542519
Gcdh	2.56102	0.0687069
Eif3m	2.55984	0.0199035
Atp6v0a1	2.55904	0.0834989
Stx5a	2.55833	0.00679151
Sfxn3	2.55751	0.00824191
Pex16	2.55598	0.313854
Itm2b	2.5557	0.171832
Psmd5	2.55496	0.111936
Gxylt1	2.55463	0.0579979
Dnajc25	2.55301	0.067133
Agpat5	2.55297	0.0808419
Gdi2	2.55287	0.0869661
Pkm	2.55231	0.136336
Esyt2	2.55122	0.0713056
Lsg1	2.55115	0.0273223
Mccc2	2.551	0.160403
Clptm1l	2.54782	0.0413928
Rps24; LOC677113; LOC102642752	2.54501	0.0330393
Crat	2.54449	0.0476907
Ano10	2.54437	0.010658
S1pr3	2.54427	0.0280265
Arl8b	2.54406	0.0507476
Tmco1	2.54386	0.00665657
Gm10177; Sec61g; Gm11575; LOC102637269; Gm4184	4.18419	0.205543
Adpgk	2.54252	0.0611419
Slc9a1	2.54231	0.000354711
Fam134b; Retreg1	2.54173	0.108588
Xpnpep3	2.5396	0.31502
Cox17	2.53822	0.157645
Ccdc167	2.53813	0.080365
Prep	1.35958	0.452283
H2-K1	2.53406	0.0362909
Faf2	2.53334	0.00654675
Uqcc; Uqcc1	3.06394	0.0786808
Abhd12	2.53257	0.00345096
Rab13	2.53075	0.0370341
Ermp1	2.5298	0.0169815
Rab9	2.52743	0.00177449
Comt	2.52501	0.0700032
Atp6v1h	2.52484	0.0283152
Ptpmt1	2.52325	0.119228
Gpr137b	2.52314	0.0449813
Rab32	2.52277	0.0235761
Naa25	2.52261	0.0923311
Fam20b	2.52063	0.0858983
Psmb3	0.554854	0.671643
Ept1; Selenoi	2.51855	0.0251698
Ptgis	2.51718	0.0276544
Ppap2a; Plpp1	2.51577	0.0415437
Cox7a2l	2.51292	0.00391427
Abcb6	3.51424	0.118822
Slc35a1	2.51213	0.0696381
Gprc5b	2.51171	0.00163992
Atad1	2.51073	0.00136253
Grn	2.5088	0.326884
Tmx3	2.50837	0.0463458
F5	2.5078	0.0729148
Ddost	2.50683	0.0778444
Gmps	2.50651	0.0531785
Herpud1	2.50618	0.0434217
Rplp1	2.50386	0.014158
Dpy19l1	2.49908	0.170476
Cse1l	2.49796	0.0400054
Flrt2	2.25614	0.0745891
Tgoln2	2.95076	0.169791
Tomm40	2.49528	0.0033223
Tnpo1	2.49449	0.0277269
Bzw2	2.49395	0.0383681
Cdc42	2.49357	0.0117404
Cyb5r3	2.49231	0.000216333
Gna11	2.49154	0.00323562
Rap2a	2.49085	0.0737996
Alg1	2.4895	0.205216
Rab3gap1	2.48814	0.175329
Eif3e	2.48748	0.03653
Hadh	2.48551	0.0739919
Rab5a	2.48506	0.0473213
Sgpp1	2.48431	0.0708231
Mrpl10	2.48417	0.0990747
Atl3	2.48291	0.0279805
Ndufaf1	2.47705	0.0354684
Sco2	2.47384	0.107333
Slc25a11	2.47203	0.0195414
Rce1	2.4713	0.00333766
Atrn	2.46928	0.0527674
6330416G13Rik; Tmem268	2.4691	0.200057
Aifm2	2.46736	0.142906
D2hgdh	2.46651	0.106843
Bcl2l13	2.46613	0.0225043
Rab11b	2.46443	0.0589241
Rnf121	2.46396	0.00755962
Ilf2	2.46353	0.228026
Pkd2	2.46331	0.0495625
Slc2a1	2.46311	0.0347714
Farsb	2.46093	0.0309918
Hccs	2.45971	0.0323959
Mxra8	2.45962	0.0649479
Zfr	1.93775	0.0158156
Ssr3	2.45549	0.0983857
Rab18	2.45515	0.0089632
Rac1	2.45473	0.00405466
Ralb	2.45437	0.0531629
Pigk	2.4539	0.102579
Dcakd	2.45358	0.0303437
Tm2d2	2.45298	0.191828
AI480653; Xxylt1	2.45263	0.044356
Atp2a2	2.45068	0.0569822
Hexa	2.4503	0.0298612
Apob	2.45028	0.15961
Rab8a	2.44957	0.00714288
Prpf4	2.44911	0.0628826
Cd1d1	2.44764	0.0062205
Dpm1	2.44761	0.128614
Sec22a	2.44728	0.115751
Gnao1	2.44668	0.0937777
Tor1b	2.44458	0.0729603
Tspan5	2.44452	0.0788405
Frrs1	2.44366	0.0412015
Rab12	2.44361	0.0215603
Dgat1	2.44155	0.120637
Flot1	2.44127	0.0201472
Slc35e1	2.43769	0.0638245
Stt3b	2.43717	0.0321019
Chpt1	2.43525	0.162727
Gfm2	2.43524	0.0426133
Capn2	2.43496	0.0455971
Gls	2.43458	0.0490581
SERPING1	2.43081	0.135902
Napa	2.42997	0.03805
Pgrmc2	2.42963	0.0862319
Cfl2	2.42741	0.170784
Slc31a1	2.42663	0.0995346
Atp1b3	2.42595	0.0174102
Armc1	2.42525	0.00269102
Gnpat	3.74174	0.141213
Ei24	2.42475	0.0224449
Abca3	2.4246	0.149274
Efr3a	2.4243	0.0232669
Ap3s1	1.13994	0.258792
Noa1	2.4229	0.130125
Slc25a5	2.42255	0.0474097
Atf6b	2.4214	0.248422
App	2.41889	0.256449
Carkd; Naxd	2.41783	0.0596897
Gpx8	2.41651	0.0966706
Gpd2	2.41518	0.0185656
Abhd10	2.41451	0.134116
Ptpn1	2.41374	0.0762937
Actr2	2.41315	0.0616106
Rab2a	2.41228	0.0355289
Hsd17b7	2.41171	0.0339935
Lss	2.41041	0.00808707
Jagn1	2.40907	0.137098
Ptpra	2.40816	0.0552145
Tor3a	2.40635	0.108568
Timmdc1	2.82564	0.172226
Golph3l	2.40412	0.144267
Rab5c	2.40235	0.0770103
Atpaf2	2.401	0.170208
Bzw1	2.39809	0.0116918
Pes1	3.14602	0.0715424
Hgsnat	2.39663	0.118306
Ergic3	2.39458	0.161424
Erap1	2.39314	0.0780257
Ndufa1	2.3927	0.0844955
Ap3b1	2.39079	0.00563127
Ghdc	2.39027	0.128238
Nnt	2.38943	0.0253934
Strn	2.38767	0.202195
Sgpl1	2.38696	0.122287
Cd44	2.38593	0.0032002
Mogs	2.38533	0.0293492
9430016H08Rik; Maip1	2.38523	0.0484593
Samm50	2.38465	0.0566347
Tmem245	2.38434	0.0627128
Hnrnpul1	2.38304	0.202282
2410091C18Rik; Ndufaf7	2.38301	0.00176401
Plch1	2.38163	0.0885248
Ak3	2.38077	0.0647085
Prdx1	2.37976	0.0432428
Pcbp2	2.37729	0.0046347
Ptplad1; Hacd3	2.37646	0.0378466
Ndfip2	2.37641	0.144846
Tamm41	2.37402	0.0709282
Dpy19l3	2.37329	0.00146405
Ptges2	2.37302	0.00125407
Ormdl2	2.37286	0.236668
Mrps15	2.37185	0.220119
Cacybp	2.36949	0.0373906
Txnrd1	2.3693	0.212216
Nup50	2.3692	0.193784
S100a11	2.36849	0.0918505
Emd	2.36841	0.179816
Cand1	2.36832	0.0564886
Rab21	2.36803	0.016627
Rpl7	2.36738	0.115549
Pigt	2.36698	0.00325884
Serhl	2.36578	0.0439633
Htra2	2.36469	0.0761648
Gls	2.3631	0.123512
Aph1a	2.36143	0.0354926
Cstf2	2.36136	0.00637296
Axl	2.3609	0.0314999
Nipsnap3b	2.35951	0.105089
Cpd	2.35804	0.0180466
Sec22b	2.35779	0.0109497
Ugt1a6a	2.35766	0.0782981
Vat1	2.35652	0.0252028
Rab31	2.35638	0.0718243
Stx7	2.35339	0.0617644
Tram2	2.35311	0.0675601
Ergic2	2.35262	0.0182808
Rpl15	2.35249	0.044963
Sec62	2.35032	0.161817
Sigmar1	2.35022	0.0261376
Tmem186	2.34996	0.0558049
Bcat2	2.34992	0.0937174
Eef1d	2.34918	0.023774
Slc7a5	2.34885	0.0894428
Atp2b1	2.34866	0.0764754
Mlkl	2.34765	0.126302
Psmd1	2.34687	0.125134
Fahd1	2.34662	0.0695229
Hdhd3	2.34525	0.0113507
Copg2	2.34491	0.132043
Rrm2	1.88423	0.0999485
Pml	2.34435	0.0220276
Fam125a; Mvb12a	2.34377	0.165879
Gpt2	2.34295	0.244699
Tapbp	2.34205	0.00472558
Igf2r	2.34182	0.00363928
Hspbp1	2.34156	0.0950376
Copz1	2.34152	0.00131478
Acsl5	2.34145	0.091691
Rap1b	2.34075	0.0412757
Mob1b	2.34057	0.240798
Arpc3	2.33976	0.243989
Man1b1	2.33952	0.235803
Arl2	2.33847	0.0162369
Abcd1	2.33819	0.221206
Ccdc115	2.33818	0.101034
Tmem43	2.33748	0.00509725
Slc25a3	2.33745	0.0754709
Ndufa9	2.33707	0.0683684
Slc12a4	2.337	0.0514657
Inf2	2.3368	0.163045
Ppib	2.33668	0.0495923
Slc30a5	2.33572	0.157886
Dnajc19; Dnajc19-ps; Gm15118	2.33325	0.00984797
Pigs	2.33276	0.0196226
Idh1	2.33276	0.0270828
Pdxdc1	2.33112	0.00455669
Cisd1	2.33095	0.0630696
Srp68	2.33036	0.00628931
Amfr	2.32997	0.0667862
Gpr89	2.32934	0.107797
Mgst1	2.32868	0.0814419
Sec23b	2.32851	0.0859287
Slc38a10	2.328	0.119304
Oxsm	2.32737	0.20337
Cd109	2.32691	0.0523157
Itfg3; Fam234a	2.90985	0.254898
Csnk2a1	2.32434	0.0403535
Gnai3	2.32161	0.0843723
1300001I01Rik; Cluh	2.32039	0.31214
Ptgs1	2.32015	0.0532033
Aldh3a2	2.31839	0.0105257
Rab8b	2.31766	0.168367
Tuba1a	2.31589	0.129375
Zadh2	2.31373	0.00026814
Rab10	2.31257	0.0119806
Extl2	2.31189	0.0633265
Ecsit	2.31156	0.0681666
Pus1	2.31053	0.0269271
Apoa1bp; Naxe	2.30998	0.0916846
Fis1	2.30936	0.109092
Rhob	2.30924	0.163107
Slc25a13	2.30892	0.0202885
Atp5k	2.30858	0.0442277
Mrpl50	2.30702	0.0443066
Ttyh3	2.30544	0.00142705
Atp5o; LOC100047429; LOC102641678	2.30278	0.0356487
Acsl1	2.30275	0.0782416
Crot	2.30263	0.0576038
Crtap	2.3024	0.0539507
Gnai2	2.30143	0.0477164
Vamp2	2.3003	0.01793
Abhd1	2.29752	0.0176591
Kpna3	2.2972	0.0645221
Nptxr	2.83089	0.104139
Cdc37	2.293	0.0898512
Mtx1	2.2922	0.0228089
Ssr4	2.28848	0.168365
Sgcd	2.28714	0.0695465
Myadm	2.28706	0.0561189
Gpnmb	2.28259	0.159499
Cep350	2.28186	0.00578685
Rpl30; Rpl30-ps8; Gm12191	2.2817	0.0460158
Anxa7	2.27936	0.0439039
Ccbl2; Kyat3	2.27898	0.00686926
Epb4.1l2; Epb41l2	2.27838	0.127594
Ifitm2	2.27789	0.178603
Iars2	2.27787	0.0651657
Dhrs9	2.27759	0.0650147
Slc25a24	2.27551	0.0401979
Cope	2.27532	0.0892292
Abcb10	2.27327	0.0199159
Cyp20a1	2.27297	0.0759127
Ptges	2.27268	0.135986
Tgfbr1	2.27253	0.204924
Abcf2	2.2724	0.281941
Rheb	2.27075	0.0646922
Kirrel	2.27072	0.137983
Rap2c	2.27034	0.0271074
Rab23	2.26919	0.00719899
Esyt1	2.26853	0.0653971
Abcb8	2.26783	0.0110201
Cox4i1	2.26601	0.0383851
Acaa1a	2.26396	0.0105116
Selk; Selenok	2.26131	0.124463
Asns	2.25999	0.0285639
Pdcd6ip	2.2586	0.0520649
Tmed2; Gm21540; LOC100862175; Gm10698	2.2571	0.0928936
Txnrd2	0.575703	0.782302
Fkbp8	2.25686	0.0181852
Pla2g4a	2.25647	0.0112242
Ddr2	2.25471	0.0234998
Naalad2	2.67265	0.164247
Tmem63b	2.25242	0.127694
Arf5	2.25154	0.00632757
Stx12	2.24747	0.061937
Ptprk	2.24686	0.160612
Nipsnap1	2.2454	0.115968
Slc38a4	2.24404	0.0137311
Ccdc47	2.24099	0.010663
Sel1l	2.2409	0.035766
Emc7	2.24087	0.0850526
Slc25a4	2.24032	0.00143786
Cr1l	2.24021	0.113593
Acat2	2.23896	0.145328
Prdx5	2.23814	0.00914285
Acadvl	2.2379	0.0317068
Trnt1	2.23739	0.0320254
Rbpj	2.23621	0.143133
Osbpl3	2.23553	0.0905307
Mrpl54	1.8599	0.12614
Comtd1	2.2326	0.109601
Nudt19	3.0579	0.0167715
Vamp7	2.23136	0.113527
Rhoa	2.22772	0.0164905
Yars2	2.22758	0.000185439
Nras	2.22752	0.00380902
Aldh6a1	2.22567	0.0796397
Mgat2	2.22263	0.0161942
Acot7	2.22231	0.00467033
Mrpl19	2.2223	0.00879605
Vapb	2.22135	0.10296
Etfdh	2.22133	0.0691521
Aldh7a1	2.22091	0.0930912
Coq4	2.21974	0.0194613
Slc25a10; 0610009L18Rik	2.21657	0.00574253
Mrpl4	2.21467	0.0960825
Cops2	2.21371	0.00246665
Gabarap	2.21314	0.169477
Ddb1	2.2124	0.00798134
Rcc2	2.21231	0.148099
Kdelc2	2.21184	0.252902
Gng12	2.21139	0.0524698
Acp6	2.21027	0.350727
Ap1g1	2.21025	0.144383
Grb14	2.21002	0.0637561
Acsl3	2.20952	0.0740751
Yif1b	2.20951	0.0417014
Srp54a; Srp54b	2.209	0.0889682
Ly75	2.20863	0.119253
Sae1	2.20573	0.197745
Cops4	2.20398	0.124398
Mettl9	2.20375	0.00917734
Mrpl38	2.20256	0.0336809
Atp5j2	2.19932	0.00409932
Sec61b	2.19876	0.0772719
Tpp1	2.1971	0.053995
Tubb6	2.19631	0.208902
Dhrs7	2.19462	0.0192064
Aldh1l2	2.19411	0.0567116
Mocs1	2.19325	0.111312
Tubb4b	2.19322	0.0463867
Ncln	2.19313	0.0431176
Adck5	2.19306	0.114575
C1galt1c1	2.1928	0.196963
Ptrh2	2.1916	0.0181633
Sec23a	3.02238	0.0974196
Rplp0	2.18859	0.0732347
Acot2	2.18745	0.0347951
Rab1b	2.18701	0.0999027
Il1rap	2.18619	0.00738942
Ppp1ca	2.18558	0.0366124
Mmp2	2.18532	0.0638151
Snx19	2.18445	0.288044
L2hgdh	2.18442	0.0530071
Cops8	2.55877	0.0109254
B3gnt1; B4gat1	2.18322	0.149204
Idi1; LOC102635781; Gm38481	2.18311	0.0835171
P4ha1	2.89682	0.179011
Galnt2	2.18149	0.0861794
Cpne3	2.1814	0.00551085
Pgs1	2.18095	0.105932
Gm3244; Ndufb4; Gm3873	2.18074	0.109573
Slc25a12	2.18016	0.0716308
Hsd17b11	2.17926	0.00789036
Pdha1	2.17769	0.0139534
Ndufs3	2.17609	0.104834
Rhot1	2.17582	0.144678
Surf1	2.17531	0.0875823
Golga7	2.17403	0.210904
Hmgcr	2.17378	0.0488314
Src	2.17359	0.0317529
Slc6a9	2.17319	0.0828194
B3galnt1	2.17144	0.0765029
Lgals9	2.23198	0.161532
Ccdc90b	2.1706	0.0263608
Angptl2	2.17043	0.0227468
Pef1	2.16993	0.0151438
Prpf19	2.16963	0.175457
Rras	2.16845	0.0335917
Ptgr1	2.16676	0.156056
Ndufb6	2.16599	0.209189
Celf1	2.16587	0.0872456
Gusb	2.16439	0.185143
Eif5; LOC100047658; LOC102641436	2.16355	0.0732898
Lnp; Lnpk	2.16332	0.111658
Gcn1l1	2.16252	0.0530503
Tor1aip2	2.16169	0.0509202
Serpinf1	2.16163	0.113794
Atp1a1	2.15882	0.0523067
Tomm70a	2.15853	0.00467701
Copg; Copg1	2.15805	0.0873551
Rab1; Rab1a	2.15789	0.0478424
Rpn2	2.1576	0.0492946
Galnt7	2.15626	0.0614722
Timm50	2.15623	0.0467512
HBA1; HBA	2.15553	0.0812841
Gla	2.15532	0.0909569
Nt5dc3	3.66896	0.150206
Stx4a	2.15407	0.0842303
Me2	2.15126	0.000484343
Gosr1	2.15121	0.0412358
Sf3b1	0.851683	0.0192998
Stxbp3a; Stxbp3	2.14927	0.0592356
Ddx39	2.14909	0.0259128
Agpat9; Gpat3	3.61706	0.176652
Nup155	2.14795	0.0802768
Epn2	2.14681	0.0274672
Vti1b	2.14501	0.035625
Rhbdd1	2.1448	0.0520935
Dnajb11	2.14324	0.0167141
Gdpd1	2.14152	0.0295467
Sfxn1	2.14046	0.0367223
Plin3	2.14015	0.0504492
Cndp2	2.13982	0.0633851
Lrpprc	2.13744	0.0366276
Suclg1	2.13661	0.0850609
Nrp1	2.13646	0.14081
Ccdc109a; Mcu	2.134	0.0132885
Sec11a	2.13384	0.0301988
Mapre1	2.13376	0.0950809
Desi2	2.13356	0.158171
Hras1; Hras	2.13335	0.00471778
Adss	2.13306	0.268172
Capn6	2.13301	0.113381
Kpnb1	2.13248	0.0563158
Txndc12	2.13246	0.0372787
Hars2	2.13244	0.0554834
Eif2a	2.19234	0.0837192
Rgs19	2.13208	0.058408
Mrpl16	2.13187	0.0215839
Uso1	2.13105	0.102414
Hmox1	2.13045	0.100317
Rpl35a-ps4; Rpl35a; Rpl35a-ps2; Gm10243; Rpl35a-ps5; LOC100862595; Gm14279; LOC100048620	2.12874	0.0203134
Anxa6	2.12868	0.0213642
Mut	2.12718	0.0307174
Ppic	2.12675	0.0710949
Zfp36l2	2.93191	0.102308
Cyc1	2.12481	0.0546125
Ppif	2.1247	0.0677403
Idh3g	2.12464	0.204196
Ap3m1	2.12453	0.121583
Reep3	2.24702	0.0352019
Copb1	2.12214	0.11027
Cask	2.12156	0.0422234
Vars2	2.12084	0.066198
Abcb7	2.12076	0.0376035
Mrps2	2.12017	0.0631775
Prkar2b	2.11854	0.034339
Eef1b2	2.1185	0.0776252
Man2a1	2.11709	0.0529286
Snrpb	2.11706	0.111424
Api5	2.11345	0.115423
Ppp2r1a	2.11186	0.0229117
Far1	2.11052	0.0414386
Ctps	2.11044	0.29321
Pip4k2b	1.52071	0.00513779
Shmt2	2.10994	0.0353289
Cops3	2.10994	0.0750754
Ldlr	2.10978	0.160791
Rbms2	2.10942	0.0151028
Rab5b	2.10871	0.0935962
Tpp2	2.10751	0.0226946
Gnas	2.10741	0.0985792
Tmed10	2.10632	0.00300241
Pgrmc1	2.10493	0.00114669
Zfyve27	2.10425	0.152167
Mtrf1l	2.1024	0.176135
Lclat1	2.10199	0.0377871
Kras	2.10084	0.119192
Anln	2.10024	0.280881
Cs	2.09599	0.0483331
Marc2; Mosc2	2.09467	0.0796914
Picalm	2.09326	0.164767
Ahsa1	3.00618	0.247339
Mmgt1	2.09076	0.0735526
Bax	2.08869	0.0118105
Pitrm1	2.0883	0.118332
Psmd8	3.4429	0.147824
Ppp2r4; Ptpa	2.08356	0.16451
Naa15	2.08345	0.215116
Sqrdl; Sqor	2.08338	0.0972489
Tpcn2	2.08275	0.13654
Lman2	2.08176	0.0361039
Tbrg4	2.08162	0.0550683
Serpinb6a	2.07875	0.0527321
Cobll1	1.43542	0.39086
Clic1	2.07733	0.191912
Mrpl24	2.07516	0.0169278
H60b	2.07436	0.020586
Foxred1	2.07433	0.118519
Usp19	2.07351	0.0909118
Sec63	2.07289	0.0658384
Tmlhe	3.97099	0.166828
Ephb3	2.07251	0.00400943
Xdh	2.07178	0.149751
Slc12a2	2.07047	0.0809754
Lnpep	2.06987	0.000319428
LOC102631912	2.06983	0.108894
Acad8	2.06944	0.139167
Mrpl23; Mrpl23-ps1	2.06927	0.0267459
Clcc1	2.06804	0.126606
Nme3	2.06773	0.106482
Pck2	2.06554	0.0506401
Ube2j1	2.06536	0.0964421
Synj2bp; Gm20498; Synj2bp-cox16	2.06358	0.0476429
Uqcr10	2.06271	0.180789
Tmem41b	2.0626	0.285028
Il6st	2.06189	0.033859
Rala	2.06118	0.0484598
Srp9	2.06111	0.251062
Phgdh	2.06104	0.00586449
Crim1	2.14372	0.0577872
Rangap1	2.06064	0.0669419
Psmd2	2.06054	0.0693958
Nmt1	2.05843	0.279392
Rab3gap2	2.05814	0.137737
Rdh11	2.05774	0.0187229
Mrps5	2.05729	0.0377479
Fam173a	3.2223	0.121556
CPB2	1.39224	0.244507
Nedd4	2.05553	0.0196252
Ctnnd1	2.05492	0.16639
Arfgap1	2.05366	0.0555937
Hint2	1.14223	0.506989
Erp29	2.05027	0.0260216
Vps26a	2.04926	0.145044
Emc1	2.04886	0.0648306
Slc20a2	2.78765	0.173566
Aldh9a1	2.04756	0.047139
Tmem109	2.04704	0.0909558
Ctsb	2.04585	0.0512522
Rpn1	2.04559	0.0528168
Ppm1l	2.04537	0.171722
Ak4	2.04522	0.0746471
Fam38a; Piezo1	2.04441	0.205784
Ndufb5	2.04426	0.121002
Clpx	2.04396	0.0165245
Sars	2.04364	0.00791436
Ufd1l; Ufd1	2.04113	0.131614
Slc39a3	2.35867	0.112607
Anxa5	2.03989	0.000308264
Gstp1	2.03964	0.0376792
Ndufa4	2.03918	0.00785766
Tprgl	2.0391	0.0373327
Stoml2	2.03807	0.245045
Lias	2.03756	0.00480249
Mdh2	2.03729	0.0231332
Sco1	2.03724	0.0135782
Erp44	2.03672	0.136118
Fstl1	2.03665	0.188518
Tapt1	2.03651	0.0658806
Eif3d	2.03588	0.147647
Fkbp3	2.03529	0.0201727
Mrpl27; Gm6304	2.03388	0.00519184
Atp6v1a	2.03366	0.00402319
Asah1	2.03317	0.113036
Rnh1	2.03293	0.0961205
Pofut2	2.03123	0.00313546
Gba	2.03101	0.111094
Aimp1	2.03074	0.265134
Ndufs2	2.03063	0.0777534
Kdelc1	2.03033	0.0356051
Gnb1	2.03027	0.0809765
Fam129b	2.03025	0.0344339
Tgfbr3	3.79352	0.288717
Mpc2	2.02932	0.0590122
Mfsd10	2.02778	0.0229163
Ppp1cb	2.02715	0.131959
Rpl23; LOC100044627; LOC100862455	2.02701	0.0379115
Gtf3c2	1.47445	0.227543
Glod4	2.02355	0.138351
Scp2	2.02232	0.0546054
Glo1	2.02219	0.193276
Sdf2l1	2.0218	0.13831
Cpt1a	2.02123	0.026353
Srm	2.02073	0.177884
Rpl26; Gm15772	2.02061	0.000867269
Hadhb	2.02025	0.00855311
Mrps28	2.02014	0.0643978
Actr3	2.01981	0.0627893
Poldip2	2.01951	0.0406186
Ndufa10	2.01918	0.0313772
Dpm3	2.01715	0.0896441
Rbms3	2.01715	0.0280753
Anxa2	2.01547	0.0328776
Dpp7	2.01472	0.107995
Mrpl45	2.01462	0.150195
Ube2n	2.01439	0.0982204
Megf8	2.01394	0.189431
Phb	2.01344	0.0493927
Usp14	2.01323	0.0158507
Nudt12	2.33042	0.0252067
Vwa8	2.01095	0.126555
Psmb4	2.0104	0.0610977
Nckap1	2.00844	0.0971115
Gna13	2.00787	0.0769648
Apool	2.00769	0.0739895
Ap1s2	2.00763	0.116862
Eif4e	2.00693	0.156124
Osmr	2.00689	0.0235878
Tenc1; Tns2	1.41531	0.716093
Canx	2.00451	0.0773423
Gtf2i	2.00396	0.144619
Lbr	2.00321	0.0424787
Anp32b	2.00311	0.024712
Ptcd3	2.00262	0.0820305
Gns	2.00067	0.195511
Antxr2	2.0005	0.129839
Etf1	1.99939	0.0815838
Got2	1.99802	0.00126957
Idh3a	1.99756	0.0244859
Cox6c	1.9973	0.0994568
Aifm1	1.99712	0.0338678
Fhl2	1.99582	0.324637
Arf3	1.99581	0.00963039
Dag1	1.99497	0.0343129
Npepps	1.99487	0.0638513
Cdh2	1.99212	0.196075
Sntb2	2.81598	0.106015
Efemp1	1.99056	0.0979353
Xpo5	1.98983	0.0162734
Mif	1.98954	0.0585762
Dnajb6	1.05879	0.516719
Ndufa5	1.98858	0.126774
Fdps	1.98713	0.0287204
Maoa	1.98574	0.00448448
Psmc2	1.98552	0.0381078
Agps	1.98531	0.068264
Aco2	1.98526	0.105346
Xpo1	1.98522	0.0704321
Gart	1.98461	0.285844
Cst3	1.98401	0.0062536
Pdgfra	1.98376	0.0388311
Acsl4	1.98333	0.0527183
Fv1	1.98302	0.0767984
Ctsa	1.98231	0.073773
Mrpl13	1.98211	0.0462057
Irgm1	1.9812	0.0930029
Rars	1.98055	0.00149017
Ap1g2	1.98054	0.0436353
Gnb2	1.97944	0.136034
Fndc3a	1.97934	0.0978249
Itpr3	1.97889	0.268778
Snap23	1.97837	0.0361308
Sdha	1.97782	0.125837
Thy1	1.97744	0.0184557
Rpl9	1.97655	0.143836
Dtymk	1.97599	0.108163
Ptprs	1.97572	0.0334573
Nomo1	1.97517	0.0270003
Hmga2	1.97432	0.261851
Sh3glb1	1.97267	0.0702872
Ppp1cc; Gm5601	2.69911	0.221419
Ptgs2	1.97061	0.0423762
Sdhb	1.96956	0.117118
Psma4	1.96923	0.0848557
Anxa4	1.96905	0.0481486
Tubb5	1.96846	0.0141481
Acsf2	1.96798	0.041574
Copa	1.96792	0.0962671
Camk2d	1.62847	0.130263
Snx2	1.96589	0.178209
Brd4	1.96566	0.0180369
Rps27l	1.99281	0.455042
BC003965	1.96207	0.171608
Dnajc10	1.96184	0.0666441
Lasp1	1.96182	0.0100057
Sacm1l	1.96073	0.0582823
Actn4	1.95972	0.126698
Rap1a	1.95782	0.165469
Acad9	1.95775	0.0529446
Hnrnpl	1.95762	0.164664
Mthfd1l	1.95692	0.0152218
Lars2	1.95667	0.0959185
Ldhb	1.95667	0.0948305
Rpl38; Rpl38-ps1; Rpl38-ps2	1.95466	0.0178147
Eif4a1	1.95446	0.0224743
Ptk7	1.95412	0.00438422
Pex19	1.9538	0.159878
Tmem214	3.00199	0.120331
Gcat	1.95196	0.164486
Acox3	1.95002	0.114848
Hmgb1; Gm21596; LOC100862258	1.94989	0.132554
Rab33b	1.94949	0.0950797
Ubxn4	1.949	0.0675366
Ncam1	1.94885	0.0828543
Etfa	1.94882	0.00635935
Psmd13	1.94848	0.032021
Dysf	1.94844	0.00215662
Anxa1	1.94699	0.0585168
Yipf5	1.94696	0.388759
Aars	1.94586	0.00951774
Alg5	1.9457	0.0273605
AI314180	1.94473	0.10707
Psme3	1.94466	0.0793455
Ptp4a2	1.94401	0.11122
Rras2	1.94347	0.0477096
Rbbp7	1.9431	0.0598579
Atp1b1	1.94202	0.115036
Atp5a1	1.94141	0.0146003
Ehd1	1.94015	0.0827899
Decr1	1.93998	0.287794
Mgrn1	1.93958	0.0759432
Slc30a9	1.93898	0.213439
Mrpl37	1.93877	0.0236716
Hsd17b10	1.93716	0.04762
Slc16a1	1.93701	0.132393
Aip	1.93622	0.166962
Ptbp1	1.93612	0.00851694
Hk2	1.93595	0.025933
Vcp	1.93505	0.11013
Hnrnpa0	1.93347	0.154498
Acbd3	1.93334	0.120436
Farp1	1.93333	0.167648
Cyb5r1	1.93262	0.0306687
Acads	1.93251	0.0299939
Pycr2	1.9322	0.0794836
Vcam1	1.93118	0.0682005
Glipr2	1.92987	0.0363773
Idh2	1.92971	0.00756089
Gorasp2	1.92969	0.158192
Rbp1	1.92945	0.0553727
Dap3	1.92875	0.0180172
Prkar2a	1.92657	0.039879
Pdhx	1.92479	0.0351728
Apbb2	1.92475	0.253765
Mcoln1	1.9244	0.174343
Nln	1.92354	0.117532
Supv3l1	1.92348	0.162846
Hacl1	0.653567	0.0332072
Nars	1.91971	0.0475658
Pygb	1.91921	0.00686049
Ddx39b	1.91915	0.140405
Rps8; Gm15501	1.91713	0.07699
Tmem70	1.91665	0.0279945
Noc2l	1.91665	0.201536
Arpc2	1.91572	0.0582809
Afg3l2	1.91498	0.0515732
Atp9b	1.82721	0.0304413
Heatr3	1.91367	0.0737912
Atl2	1.91346	0.123605
Cul3	1.9133	0.0658782
Gnb2l1; Rack1	1.91286	0.0582689
Hat1	1.91106	0.0993283
Ctbp1	1.91046	0.0993198
Mrps30	1.91011	0.190554
Nup214	1.90989	0.0359756
Gapdh; Gm20899; LOC100042025; Gapdh-ps15; Gm12033	1.90941	0.109292
Mfn2	1.9086	0.174455
Snx6	2.49929	0.0477082
Dnaja3	1.90792	0.104187
Acaa2	1.90746	0.0711883
Aldh18a1	1.90719	0.0916081
Mrpl47	1.90697	0.010657
Lrrc59	1.9068	0.0252226
Cpox	1.90659	0.0711269
Acadsb	1.90475	0.0472579
G3bp1	1.90369	0.0389756
Uqcrc1	1.90217	0.0627635
Oat	1.90166	0.0658069
Tmed4	1.90009	0.128463
Acot9	1.89993	0.145249
Cox10	2.71477	0.140031
Nsf	1.89586	0.104138
Dhrs4	1.89533	0.0339823
Hsd17b4	1.89519	0.0885813
Serpinh1	1.89463	0.0465901
Ptges3; Gm9769; Ptges3-ps; LOC100048119; LOC102641464	1.89447	0.0768043
Usp5	1.89271	0.173657
Rpl8	1.89181	0.249384
Mrpl15	1.89114	0.0103251
Hspa4l	1.89027	0.15653
Anxa3	1.89023	0.0408452
Nrp2	1.89011	0.055374
Copb2	1.88967	0.135765
Pdhb	1.88862	0.0102528
Phb2	1.88762	0.0476583
Alad	1.88753	0.0873445
Plod1	1.88695	0.0365624
Fabp5	1.88445	0.177307
Ddx6	1.88403	0.0419982
Gadd45gip1	1.884	0.143938
Adam10	1.8838	0.00171378
Fam49b	1.41098	0.37779
Pgd	1.88313	0.00154952
Abi1	1.88264	0.27205
Lox	1.88091	0.116375
Metap2	1.62015	0.10143
Itgb5	1.87975	0.17337
Atp6v1b2	1.87867	0.0119766
Cct8	1.87523	0.141645
Pex12	1.89326	0.0878156
Tmtc3	1.87439	0.094137
Pmpcb	1.87415	0.156388
Itih3	1.87408	0.203726
Actr1a	1.8727	0.173307
Copz2	1.87159	0.132392
Timm44	1.87156	7.72718e-05
Psat1	1.87154	0.0350589
Pdcd6	1.86989	0.00547995
Nploc4	1.86967	0.05929
Stat3	1.86953	0.120786
Chchd2	1.86912	0.110942
Trim28	1.86852	0.0246796
Parva	1.86816	0.203994
Rps27; Gm9846; Rps27rt	1.86745	0.0708118
Bgn	1.86651	0.0266395
Atp5l	1.86646	0.0917226
Asph	1.86619	0.00658625
Pafah1b1	1.86496	0.0305984
Mtap	1.86388	0.0971838
Aldh2	1.86316	0.0577785
Fkbp4	1.86085	0.00424062
Fbln2	1.85942	0.0183333
Mrpl53	1.85925	0.103753
Uba1	1.8563	0.0714152
Gfm1	1.85627	0.0608733
Ict1; Mrpl58	1.85607	0.0658424
Tmed5	1.85454	0.0749481
Rps9	1.8526	0.0283074
Ndufs7	1.8525	0.0121651
Acadm	1.8511	0.0343164
Paics	1.85045	0.0521529
Coq3	1.84868	0.0536474
Uqcrc2	1.8485	0.00795872
Ethe1	1.84767	0.0538989
Eci1	1.84538	0.0474702
Ywhaz	1.84497	0.0262237
5430435G22Rik; Rab7b	1.84432	0.127244
Clybl	2.87729	0.2487
Adprhl2	1.84295	0.211817
Ehd2	1.84024	0.108059
Plec	1.84016	0.0906599
Ptgfrn	1.83974	0.000529954
Tmem147	1.83817	0.271623
Mdh1	1.83762	0.0657152
Uap1l1	1.83747	0.0117638
Ext2	1.83672	0.0701385
Snx27	1.83637	0.170388
Ide	1.83635	0.0197846
Cbr4	1.83473	0.045802
Kpna4	1.8331	0.295682
Nadk2; Nadkd1	1.82756	0.0771566
Nagpa	1.82715	0.0282991
Srpr	1.82332	0.0574276
Snx9	1.82263	0.0164355
Pecr	1.82254	0.0602164
Rpl11	1.82206	0.0446617
Mrpl51	1.82193	0.155343
Psmb8	1.82115	0.0793875
Tpt1	1.82056	0.136406
Cct4	1.81911	0.0277519
Apex1	1.81909	0.100442
Rps7	1.81801	0.0133226
Anxa11	1.81744	0.00651539
H2-Ke6	1.81545	0.128581
Lphn2; Adgrl2	1.81498	0.0436595
2010107E04Rik	1.81483	0.0312283
Aldh4a1	3.25804	0.212549
Mrp63; Mrpl57	1.81374	0.0988994
Vapa	1.81177	0.0105551
Psmd3	1.81123	0.00140709
Glt25d1; Colgalt1	1.81119	0.00349371
Mrps35	1.81109	0.0700396
Igf2bp2	1.81042	0.0987143
Bub3	1.81023	0.0438442
Pmpca	1.80931	0.00290602
Mrps10	1.80926	0.0565026
Sars2	1.80841	0.0597916
Ckap5	1.8083	0.130946
Prelid1; LOC102641161	1.80793	0.195643
Slit2	1.80746	0.126063
Stom	1.80737	0.0274262
Mmp14	1.807	0.000695825
Dnaja2	1.80678	0.0352679
Cdk1	1.80594	0.0198609
Glg1	1.80584	0.0579746
Lpp	1.80509	0.206669
Mrpl28	1.80483	0.0437585
Eif3a	1.80354	0.0632685
Use1	1.80176	0.115815
Rps2; Rps2-ps13	1.80138	0.00213928
Tor1a	3.42975	0.331917
Rps3	1.80081	0.0776149
Echs1	1.79954	0.0717917
Vps35	1.79887	0.123689
Pnpla8	1.79784	0.00845996
Thbs1	1.79776	0.0699777
Cpne1	1.79689	0.0548323
D10Jhu81e; LOC100046684; LOC102641949	1.7966	0.0921376
Ogdh	1.79552	0.010566
Ndufb10	1.79495	0.0273401
Slmap	1.79456	0.287944
Ndufv1	1.79448	0.092361
Sucla2	1.79439	0.0863022
Hmgb2	1.79173	0.239093
Plod3	1.7912	0.00970957
Acly	1.79055	0.14804
Plod2	1.78994	0.0270008
Acadl	1.78738	0.0592907
Prkca	1.78734	0.0515467
Mcl1	1.78731	0.0325127
Ctnnb1	1.78716	0.194902
Rps15a	1.78591	0.074648
Mrpl39	1.78473	0.0184997
Rpl28	1.7845	0.0900414
Antxr1	1.78439	0.0531975
Vim	1.78367	0.173777
Psmd6	1.78198	0.164183
Mrps16	1.78147	0.0745024
Tsfm	1.7787	0.0502214
Eef1g	1.77834	0.115557
Hadha	1.77762	0.0700319
Tmem65	1.77703	0.062587
Polrmt	1.77628	0.149296
Lap3	1.77622	0.0247808
Capns1	1.7761	0.282949
Esd	1.77568	0.0115995
Hsp90ab1	1.77562	0.0484496
Tor1aip1	1.77549	0.058243
Loxl1	1.77535	0.14403
Pdk3	1.77524	0.033512
Osbp	1.77443	0.0633892
Tardbp	1.77345	0.15245
Arpc4	1.77312	0.0318274
Brd8	1.77246	0.0735577
Cspg4	1.77172	0.00130789
Plxnb2	1.77127	0.00776669
Lyplal1	1.77	0.171672
Actn1	1.76999	0.137544
H6pd	1.7699	0.0440141
Igf1r	1.76989	0.162003
Mrpl44	1.76978	0.340537
Stx2	1.76972	0.0923432
Vps29	1.76882	0.12181
Prdx6	1.76758	0.272572
Psmc6	1.76686	0.0457015
Eif4g1	1.76686	0.142533
Stxbp1	1.76467	0.0370722
Ergic1	1.76429	0.0363802
Hnrnph2	1.76354	0.114149
Spg21	1.7625	0.140903
Fen1	1.76155	0.0400673
Arcn1	1.76151	0.0720592
Ranbp1	1.76132	0.134763
Ppia	1.76131	0.0644793
Pdia6	1.76103	0.0662773
Aldh5a1	1.76092	0.148654
Mthfd1	1.75937	0.0109279
Plaa	1.75933	0.00328625
Magt1	1.7592	0.172055
Prkar1a	1.75895	0.0698916
Snx4	1.7572	0.163458
Tuba1b	1.75712	0.0255146
Emc3	1.7571	0.0249926
Grpel2	1.75709	0.0923934
Pcna	1.75331	0.0397915
Ivd	1.75314	0.0598755
Pex14	1.75211	0.108836
Sec61a1	1.75133	0.102983
Myof	1.74996	0.150601
Eif3f	1.74887	0.26749
F2	1.74768	0.100454
Scrib	1.74736	0.0419737
Fh1	1.7467	0.0146284
Sf3b3	1.74598	0.0381206
Dync1h1	1.74478	0.100929
Ddah2	1.74422	0.0164132
Itga6	1.74417	0.182028
Hibadh	1.74406	0.110967
Capzb	1.7428	0.0488321
9530068E07Rik	1.74269	0.122891
Lima1	1.74166	0.0272878
Cox7c; Gm12338; LOC100048613; LOC102642884	1.74126	0.00861657
Ap1m1	1.74124	0.161527
Ephb4	1.74117	0.0391929
Fscn1	1.7411	0.00976345
Opa1	1.74086	0.0638171
Eif4g2	1.74054	0.0720179
Dstn	1.73842	0.0461527
Cox5a	1.73784	0.0538358
Ywhab	1.73603	0.0271961
Trap1	1.73536	0.0133735
Emc8	1.7348	0.124177
Dhfr	1.92939	0.0483019
Mrps9	1.73424	0.00564664
Lmf1	1.73416	0.0011357
Vars	1.7341	0.0577468
Lamp2	1.73404	0.258988
Pls3	1.73333	0.0635239
Elovl6	1.73292	0.262014
Dab2	1.73283	0.0470311
Sec13	1.73205	0.0148602
Caml	1.73094	0.00555952
Psmd14	1.73055	0.147017
Ppa2	1.73018	0.0974119
Immt	1.73015	0.23656
Capn1	1.72839	0.0977849
Sec31a	1.72799	0.0665641
Psma5	1.72561	0.026372
Chmp6	1.7242	0.210552
Epb4.1l3; Epb41l3	1.7242	0.136845
Atic	1.721	0.00652622
Vps37c	1.72052	0.1552
Ruvbl1	1.71926	0.00020662
Pi4k2b	1.71872	0.0316485
Mrpl35	1.71793	0.268711
Ogt	0.689985	0.0957081
Atp7a	1.71666	0.225375
Prdx4	1.71613	0.0206283
Cap1	1.71338	0.039206
Mrpl3	1.7123	0.277789
Rhot2	1.71221	0.0630068
Aprt	1.71217	0.123223
0910001L09Rik; Lamtor4	1.71208	0.128914
Rpl24	1.70869	0.0637024
Kpna2	1.70784	0.0127453
Capza2	1.70771	0.0485735
Tfrc	1.70664	0.0598318
Eps15	1.70624	0.0425099
Fkbp10	1.70429	0.0148959
Hsp90b1	1.70347	0.0452723
Pgam1	1.70129	0.13815
Pak2	1.7001	0.0749197
Raver1; Raver1-fdx1l; Gm38431	2.01512	0.0173833
Ndufv2	1.69972	0.0776614
Cox5b	1.69777	0.128733
Ak2	1.69753	0.0175395
Fech	1.69746	0.20835
Ganab	1.69743	0.00656197
Hsdl2	1.6974	0.047858
Tln1	1.69709	0.144334
Uqcrh	1.69679	0.0320563
Plxna1	1.69657	0.0727255
Mrpl21	1.69649	0.0785168
Tars2	1.69615	0.231681
Mrpl43	1.6957	0.000482116
Dnaja1	1.69445	0.17286
Tceb1; Eloc; LOC101056616; LOC102642819	1.69399	0.160969
Fkbp11	1.69272	0.117559
Psmd12	1.6923	0.00538093
Ndufs1	1.69101	0.0292946
Tial1	1.69045	0.105022
Abce1	1.68956	0.11309
Blvra	1.6882	0.125687
Sod2	1.68799	0.0519122
Txndc5	1.68765	0.0133217
Eral1	1.6874	0.11696
Strn3	1.68651	0.0187303
44076	1.68574	0.0589011
LOC100045999; Ran; LOC102641332	1.68338	0.0195483
Rps23	1.68324	0.102005
Psmd7	1.6832	0.106414
Aldoa	1.68257	0.00300014
Emc6	1.68254	0.105016
Sf1	1.6824	0.155959
Suclg2	1.68129	0.0791589
Ap3d1	1.68122	0.192203
Txnl1	1.68103	0.0872881
Psmd4	1.68076	0.0730991
Lepre1; P3h1	1.68003	0.0690026
Bckdha	1.67806	0.055589
Mrpl2	1.67782	0.0191385
Mcat	1.67723	0.187771
Rpl5	1.6765	0.107644
Snd1	1.67624	0.0905075
Mrpl48	1.6748	0.15562
Ecm1	1.67241	0.00433609
Ywhae	1.67195	0.0691166
Igf2bp3	1.67036	0.038941
Prmt1	1.66983	0.114766
Hspa9	1.66852	0.0867348
Ndrg1	1.66775	0.258829
Tars	1.66714	0.0324682
Cct7	1.66696	0.0917096
Rpsa; LOC100045332; LOC100505031; LOC102642689	1.66522	0.0924364
Dazap1	1.66462	0.0778344
Prdx2	1.66327	0.0222716
Bri3	3.1272	0.214709
Cox7a2	1.658	0.170809
D17Wsu104e; Mydgf	1.65777	0.0921239
Mcm4	1.65669	0.0598978
Pabpc1	1.65565	0.0216803
Ankfy1	2.20743	0.156198
Iqgap1	1.65444	0.0894317
Ap1s1	1.65437	0.274399
Exd2	1.65243	0.0925063
Rftn2	1.65165	0.0202997
Vps26b	1.64896	0.0622035
Itgav	1.64762	0.131268
Dpp3	2.22903	0.240249
Hyou1	1.64546	0.0292112
Smarcc1	2.45935	0.102689
Rps20	1.64404	0.217445
Nucb2	1.64161	0.218704
Itch	1.63911	0.0716978
Hars	1.63734	0.0958673
C4BPA	3.02465	0.238207
Gars	1.63706	0.0397249
Nrd1	1.63622	0.0086779
Cmc1	1.63611	0.23517
Trim32	2.27065	0.108042
Acta1	1.63549	0.141118
Eef2	1.63412	0.0623712
Khdrbs1	1.63308	0.0106818
Cat	1.63296	0.0487366
Fam82a2; Rmdn3	1.63192	0.220443
Hspa1a; Hspa1b	1.63191	0.0887167
Fam54b; Mtfr1l	1.63171	0.12387
Pgm2	1.63087	0.0120826
Erlin2	1.62893	0.0220551
Mars	1.62857	0.0867144
Prkacb	1.62713	0.0149463
Hmgcl	1.6268	0.00521925
Gsr	1.62558	0.0966066
Cc2d1b	1.62556	0.123086
Nudt9	1.62475	0.0272141
Uqcrfs1	1.6247	0.0247898
Wdr1	1.62446	0.0545047
Pebp1	1.62423	0.190317
Psmb2	1.62408	0.108889
Lonp1	1.62376	0.0950159
Smurf1	1.6235	0.117884
Paip1	1.62293	0.173531
Mfn1	1.62187	0.0952185
Rpl3	1.62129	0.179988
St13	1.62016	0.0298108
Ugt1a7c	1.61937	0.343588
Rps11	1.61923	0.0637154
Lsm4	1.61879	0.173517
B3galtl; B3glct	1.61728	0.131374
Mrpl18	1.61539	0.0310972
Ap2b1	1.61449	0.118215
Aars2	1.61437	0.0206407
Ptpn23	1.61429	0.162941
Dlst	1.61342	0.0935208
Hsph1	1.61272	0.0164846
Got1	1.61235	0.00813775
Aimp2	1.17232	0.228125
Psmd11	1.61051	0.055877
Psma2	1.61025	0.0322777
Pgk1	1.60978	0.0624796
Cct5	1.60973	0.0480152
Ppp4c	1.6087	0.474449
Pcbp1	1.60861	0.0304078
Atp5b	1.60803	0.0532562
Arhgdib	1.60671	0.101319
Rpl21	1.60592	0.0850699
Scd1	1.60583	0.151399
Mllt4; Afdn	1.9918	0.12204
Calr	1.60519	0.108168
Acat1	1.60497	0.0336743
Rpl10; Rpl10-ps1	1.60477	0.13086
Vta1	1.60358	0.00416125
Pet112; Pet112l; Gatb	1.60221	0.131287
Tmem242	1.60212	0.176499
Mrps21	1.60104	0.00919659
Dynlt1b; Dynlt1f; Dynlt1c; Dynlt1a	1.60043	0.241823
44085	1.60041	0.208155
Arhgdia	1.59975	0.00943637
Tkt	1.5996	0.156106
Sil1	1.59938	0.415595
Mbnl1	1.59788	0.200649
Bcl2l1	1.59772	0.0391829
Mrps23	1.59761	0.106649
S100a6	1.59693	0.205653
Ddah1	0.176615	0.930536
Nup35	1.59654	0.0449506
Hnrnpll; Hnrpll	1.59544	0.123046
Dlg1	1.5951	0.150065
Ppp1r18	1.59491	0.158342
Vcl	1.59192	0.0425679
Rbbp4	1.59037	0.174501
Ilkap	1.58961	0.213796
Tcp1	1.58903	0.122828
Insr	1.58816	0.298082
Pfn1	1.58594	0.138851
Dnm1	1.58453	0.0659016
44083	1.58376	0.00666362
Atp5c1	1.58263	0.00366681
Rpl19; Rpl19-ps11	1.58213	0.112599
Rasa4	1.58121	0.190967
Ddx5	1.57925	0.0628065
Dbnl	1.5789	0.0234033
Atp13a3	2.96007	0.199899
Farsa	1.57745	0.109004
Taco1	1.57711	0.075595
Clpb	1.57706	0.121872
Eprs	1.57697	0.00682514
Cops7a	1.5748	0.0419327
Scap	1.57479	0.0324332
Psmc5	1.57447	0.0308219
P4ha1	1.57433	0.0908311
Plxna2	1.57395	0.0388362
Fasn	1.57378	0.109463
44081	1.57357	0.0986681
Cbx3	1.57213	0.0499165
Mcm7	1.57204	0.300105
Hspa4	1.57009	0.0232992
Psmb5	1.5686	0.131156
Erlec1	1.56816	0.189973
Pdia3	1.56725	0.0225388
Stam2	1.56674	0.0776136
Fndc3b	1.56485	0.143137
Hnrnpab	1.56411	0.0182806
Map1lc3a	1.56335	0.170695
Ctnna1	1.56294	0.0612944
Atp5h	1.56164	0.0668084
Oxct1	1.5603	0.0834257
Rpl18a	1.55974	0.0558398
Snrpd1	1.55969	0.0504736
Cpe	1.55953	0.085966
Hnrnpc	2.47228	0.102645
Hmgcs1	1.55713	0.0113164
Atp5f1	1.55697	0.0957218
Supt5; Supt5h	1.55628	0.253236
Eif3l	1.55583	0.193124
Lgmn	1.55503	0.136819
Mrps34	1.55478	0.0757355
Hspa8	1.55375	0.0060479
Atp6v1c1	1.55353	0.300283
Mrpl9	1.55323	0.146152
Rpl12	1.55124	0.087133
Akap8	0.736107	0.0230191
Nit2	1.55015	0.0743733
Fam40a; Strip1	1.54928	0.458753
Prl2c2	1.54745	0.0604401
Mrps27	1.54553	0.0539908
Dld	1.5453	0.0854795
Rps5	1.54512	0.206042
Hdlbp	1.5446	0.0565025
Aebp1	1.54213	0.0877651
Elavl1	1.54152	0.00284706
Trp53bp1	1.53705	0.25719
Hibch	1.537	0.177517
Xpnpep1	1.53692	0.20467
Mrps14	1.53637	0.198946
Ssb	1.53605	0.258478
Psma6	1.53599	0.08922
Mmab	1.535	0.18721
Lin7c	1.53154	0.30339
Yars	1.53092	0.105569
Chd4	1.52974	0.0819766
Rpl4	1.52965	0.0695445
[truncated: 476 more rows]
